# Supplementary material for: Mapping diphtheria-pertussis-tetanus vaccine coverage in Africa, 2000–2016: a spatial and temporal modelling study
Source: PubMed Central journal article supplement (PMC6497987; doi:10.1016/s0140-6736(19)30226-0), 2019-05-04
Supplement: mmc1.pdf [file mmc1.pdf]

# THE LANCET

## Supplementary appendix

This appendix formed part of the original submission and has been peer reviewed.  
We post it as supplied by the authors.

Supplement to: Mosser JF, Gagne-Maynard W, Rao PC, et al. Mapping diphtheria-pertussis-tetanus vaccine coverage in Africa, 2000–2016: a spatial and temporal modelling study. *Lancet* 2019; published online April 5. [http://dx.doi.org/10.1016/S0140-6736\(19\)30226-0](http://dx.doi.org/10.1016/S0140-6736(19)30226-0).

**Supplementary Information for  
Mapping diphtheria-pertussis-tetanus vaccine coverage in Africa, 2000-2016:  
a spatial and temporal modelling study**

**Table of Contents**

|                                                                                                        |    |
|--------------------------------------------------------------------------------------------------------|----|
| Figures and Tables.....                                                                                | 2  |
| 1.0    eFigures.....                                                                                   | 2  |
| 2.0    Supplementary Figures .....                                                                     | 2  |
| 3.0    Supplementary Tables.....                                                                       | 3  |
| Supplementary Materials .....                                                                          | 13 |
| 1.0    GATHER checklist .....                                                                          | 13 |
| 2.0    STROBE checklist .....                                                                          | 13 |
| 3.0    Data Sources and Processing .....                                                               | 15 |
| 3.1    Data sources excluded from model .....                                                          | 35 |
| 3.2    Data preparation.....                                                                           | 35 |
| 3.3    Geographic positioning of clusters and spatial integration of areal data.....                   | 38 |
| 4.0    Covariates .....                                                                                | 40 |
| 5.0    Geostatistical Model .....                                                                      | 44 |
| 5.1    Overview of modelling process .....                                                             | 44 |
| 5.2    Regional model geographies .....                                                                | 46 |
| 5.3    Covariate ensemble modelling using stacked generalization .....                                 | 46 |
| 5.3.1    Covariate extrapolation .....                                                                 | 49 |
| 5.3.2    Relative covariate importance.....                                                            | 51 |
| 5.4    Geostatistical Model .....                                                                      | 54 |
| 5.4.1    Model description .....                                                                       | 54 |
| 5.4.2    Priors .....                                                                                  | 55 |
| 5.4.3    Spatial mesh construction .....                                                               | 56 |
| 5.4.4    Model fitting and estimate generation.....                                                    | 56 |
| 5.4.5    Conditional ordinal regression modelling.....                                                 | 57 |
| 5.5    Model validation .....                                                                          | 68 |
| 5.5.1    Metrics of predictive validity .....                                                          | 68 |
| 5.5.2    Model comparisons .....                                                                       | 78 |
| 5.6    Post-estimation calibration to national estimates from the Global Burden of Disease Study ..... | 83 |
| 5.6.1    Production of GBD national coverage estimates .....                                           | 83 |
| 5.6.2    Calibration of geospatial estimates to GBD national coverage estimates .....                  | 84 |
| 6.0    Comparison of results to existing estimates .....                                               | 86 |
| 6.1    Comparison of pre-calibration geospatial model to GBD estimates .....                           | 86 |
| 6.2    Comparison to DHS estimates .....                                                               | 89 |
| 6.3    Comparison to Gavi Full Country Evaluations Project small area estimates .....                  | 93 |
| 6.0    References.....                                                                                 | 98 |

|    |                                                                                                                 |    |
|----|-----------------------------------------------------------------------------------------------------------------|----|
| 1  | <b>Figures and Tables</b>                                                                                       |    |
| 2  |                                                                                                                 |    |
| 3  | <b>1.0 eFigures</b>                                                                                             |    |
| 4  | eFigure 1: Data availability .....                                                                              | 4  |
| 5  | eFigure 2: Modelling regions used for geospatial estimation of DPT coverage.....                                | 5  |
| 6  | eFigure 3: Estimated changes in DPT3 coverage between 2000-2016, by second-level administrative unit.....       | 6  |
| 7  | eFigure 4: Changes in DPT1 coverage in Africa, 2000-2016.....                                                   | 7  |
| 8  | eFigure 5: Administrative-level DPT1 coverage in Africa, 2016.....                                              | 8  |
| 9  | eFigure 6: Relative DPT1-DPT3 dropout in Africa, 2000-2016.....                                                 | 9  |
| 10 | eFigure 7: Absolute DPT1-DPT3 dropout in Africa, 2000-2016.....                                                 | 10 |
| 11 | eFigure 8: Estimated changes in DPT1-3 absolute dropout in Africa, 2000-2016.....                               | 11 |
| 12 | eFigure 9: Administrative-level absolute and relative DPT1-DPT3 dropout in Africa, 2016.....                    | 12 |
| 13 |                                                                                                                 |    |
| 14 | <b>2.0 Supplementary Figures</b>                                                                                |    |
| 15 | Supplementary Figure 1: Flow diagram of survey identification and data loss during data cleaning.....           | 37 |
| 16 | Supplementary Figure 2: Weighted DPT3 coverage, by age cohort and survey.....                                   | 38 |
| 17 | Supplementary Figure 3: Spatial resampling of areal data.....                                                   | 40 |
| 18 | Supplementary Figure 4: Maps of included high-resolution covariates.....                                        | 43 |
| 19 | Supplementary Figure 5: Overview of modelling process.....                                                      | 45 |
| 20 | Supplementary Figure 6: Example of covariate ensemble modelling.....                                            | 46 |
| 21 | Supplementary Figure 7: Predicted in-sample DPT3 surfaces from the ensemble covariate modelling progress,       |    |
| 22 | 2016.....                                                                                                       | 48 |
| 23 | Supplementary Figure 8: Covariate extrapolation by model region.....                                            | 49 |
| 24 | Supplementary Figure 9: Relative covariate importance plots.....                                                | 51 |
| 25 | Supplementary Figure 10: Example finite elements mesh.....                                                      | 56 |
| 26 | Supplementary Figure 11: Ternary plot of estimates of the distribution of vaccination at a single 5x5 km pixel, |    |
| 27 | by draw.....                                                                                                    | 59 |
| 28 | Supplementary Figure 12: Model uncertainty for DPT3 coverage, 2000 – 2016.....                                  | 60 |
| 29 | Supplementary Figure 13: Model uncertainty for DPT1 coverage, 2000-2016.....                                    | 61 |
| 30 | Supplementary Figure 14: Model uncertainty for DPT1-3 absolute dropout, 2000-2016.....                          | 62 |
| 31 | Supplementary Figure 15: Comparison of uncertainty and coverage, 2016.....                                      | 63 |
| 32 | Supplementary Figure 16: Beta coefficients for ensemble sub-models.....                                         | 67 |
| 33 | Supplementary Figure 17: Visualization of spatial holdouts at the second administrative level.....              | 69 |
| 34 | Supplementary Figure 18: Out-of-sample 95% coverage of predictive intervals.....                                | 70 |
| 35 | Supplementary Figure 19: Out-of-sample mean absolute error.....                                                 | 70 |
| 36 | Supplementary Figure 20: Out-of-sample mean error (bias).....                                                   | 71 |
| 37 | Supplementary Figure 21: Out-of-sample RMSE.....                                                                | 71 |
| 38 | Supplementary Figure 22: Out-of-sample predictions of DPT3 coverage vs. observed data at the second             |    |
| 39 | administrative level.....                                                                                       | 72 |
| 40 | Supplementary Figure 23: Out-of-sample predictions of DPT1 coverage vs. observed data at the second             |    |
| 41 | administrative level.....                                                                                       | 73 |
| 42 | Supplementary Figure 24: Out-of-sample predictions of DPT1-3 absolute dropout vs. observed data at the          |    |
| 43 | second administrative level.....                                                                                | 74 |
| 44 | Supplementary Figure 25: Residual error maps for DPT3 coverage.....                                             | 75 |
| 45 | Supplementary Figure 26: Residual error maps for DPT1 coverage.....                                             | 76 |
| 46 | Supplementary Figure 27: Residual error maps for DPT 1-3 absolute dropout.....                                  | 77 |
| 47 | Supplementary Figure 28: Out-of-sample model comparisons for DPT3 coverage.....                                 | 79 |
| 48 | Supplementary Figure 37: Out-of-sample model comparisons for DPT1 coverage.....                                 | 80 |
| 49 | Supplementary Figure 38: Out-of-sample model comparisons for DPT1-3 absolute dropout comparisons.....           | 81 |
| 50 | Supplementary Figure 39: Estimated DPT3 coverage for each comparison model, 2016.....                           | 82 |
| 51 | Supplementary Figure 40: Ternary plot of example pixel-level calibration to GBD estimates.....                  | 85 |

|    |                                                                                                                                                                                   |    |
|----|-----------------------------------------------------------------------------------------------------------------------------------------------------------------------------------|----|
| 52 | Supplementary Figure 41: Comparison of national-level estimates of DPT3 coverage from model-based geostatistics (MBG) and the Global Burden of Disease study (GBD).....           | 87 |
| 53 |                                                                                                                                                                                   |    |
| 54 | Supplementary Figure 42: Comparison of national-level estimates of DPT1 coverage from model-based geostatistics (MBG) and the Global Burden of Disease study (GBD).....           | 88 |
| 55 |                                                                                                                                                                                   |    |
| 56 | Supplementary Figure 43: Comparison of national-level estimates of DPT1-3 absolute dropout from model-based geostatistics (MBG) and the Global Burden of Disease study (GBD)..... | 89 |
| 57 |                                                                                                                                                                                   |    |
| 58 | Supplementary Figure 45: Comparison of calibrated model-based geostatistical (MBG) and DHS estimates of DPT3 coverage at the first administrative level.....                      | 90 |
| 59 |                                                                                                                                                                                   |    |
| 60 | Supplementary Figure 47: Comparison of calibrated model-based geostatistical (MBG) and DHS estimates of DPT1 coverage at the first administrative level.....                      | 91 |
| 61 |                                                                                                                                                                                   |    |
| 62 | Supplementary Figure 49: Comparison of calibrated model-based geostatistical (MBG) and DHS estimates of DPT 1-3 absolute dropout at the first administrative level.....           | 92 |
| 63 |                                                                                                                                                                                   |    |
| 64 | Supplementary Figure 50: Comparison of MBG and Gavi FCE second-administrative-level estimates of DPT3 coverage for Cameroon, 2000-2015.....                                       | 93 |
| 65 |                                                                                                                                                                                   |    |
| 66 | Supplementary Figure 51: Comparison of MBG and Gavi FCE second-administrative-level estimates of DPT3 coverage for Mozambique, 2000-2015.....                                     | 94 |
| 67 |                                                                                                                                                                                   |    |
| 68 | Supplementary Figure 52: Comparison of MBG and Gavi FCE second-administrative-level estimates of DPT3 coverage for Chad, 2000-2015.....                                           | 95 |
| 69 |                                                                                                                                                                                   |    |
| 70 | Supplementary Figure 53: Comparison of MBG and Gavi FCE second-administrative-level estimates of DPT3 coverage for Uganda, 2000-2015.....                                         | 96 |
| 71 |                                                                                                                                                                                   |    |
| 72 | Supplementary Figure 54: Comparison of MBG and Gavi FCE second-administrative-level estimates of DPT3 coverage for Zambia, 2000-2015.....                                         | 97 |
| 73 |                                                                                                                                                                                   |    |

74

75 **3.0 Supplementary Tables**

76

|    |                                                                                                              |    |
|----|--------------------------------------------------------------------------------------------------------------|----|
| 77 | Supplementary Table 1: Household surveys used in mapping vaccine coverage.....                               | 16 |
| 78 | Supplementary Table 2: Data excluded from both the geostatistical model and GBD estimates.....               | 34 |
| 79 | Supplementary Table 3: Data excluded from GBD estimates but included in geostatistical model.....            | 34 |
| 80 | Supplementary Table 4: Covariates used in mapping of vaccine coverage.....                                   | 41 |
| 81 | Supplementary Table 5: Spatial hyperparameter priors selected by R-INLA, by region.....                      | 55 |
| 82 | Supplementary Table 6: Fitted geostatistical model parameters for DTP3 coverage.....                         | 64 |
| 83 | Supplementary Table 7: Fitted geostatistical model parameters for the 2-dose conditional coverage model..... | 65 |
| 84 | Supplementary Table 8: Fitted geostatistical model parameters for the 1-dose conditional coverage model..... | 66 |

85

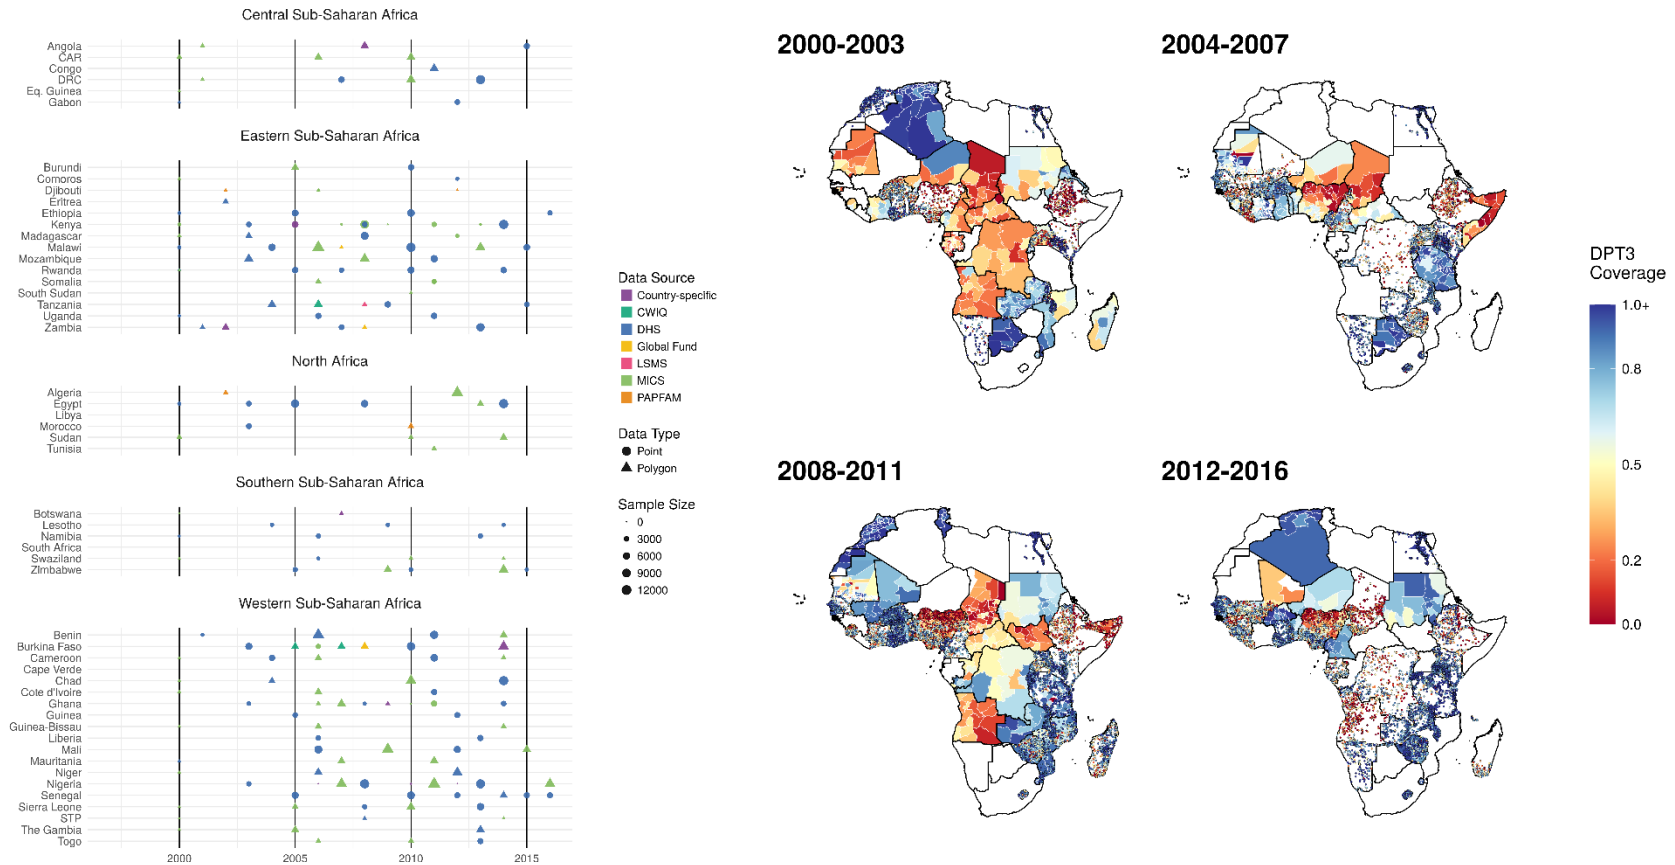

87

88

**eFigure 1: Data availability**

Data availability for DPT3 coverage. Left: scatter plot indicating the source, spatial resolution, and sample size of each survey included in the model. Right: spatial and temporal data availability, with the colour of each point or polygon representing the raw DPT3 coverage in the surveyed cluster or areal unit. Data used for modelling of the conditional vaccine coverage indicators was derived from the total data set shown here. Data sources are categorized by survey series as follows: Core Welfare Indicators Questionnaire Survey (CWIQ), Demographic and Health Survey (DHS), Global Fund Household Health Coverage Survey (Global Fund), Living Standards Measurement Study (LSMS), Multiple Indicator Cluster Survey (MICS), Pan Arab Project for Family Health (PAPFAM), or other country-specific surveys (see Supplementary Table 1 for details).

89

90

91

92

93

94

95

96

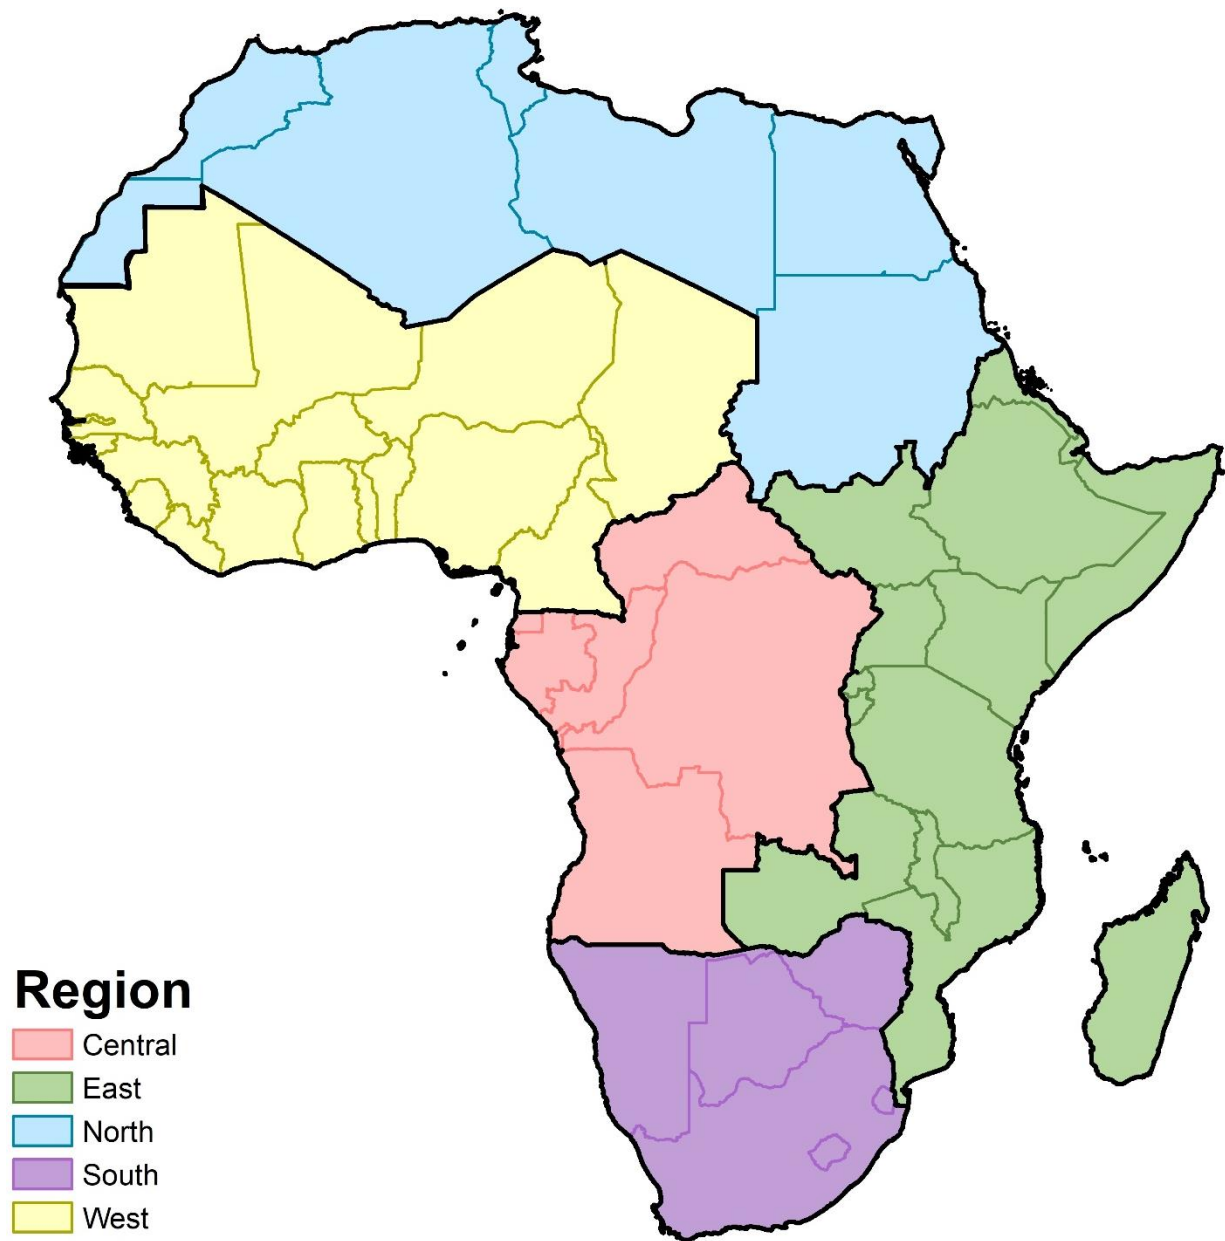

97  
 98 **eFigure 2: Modelling regions used for geospatial estimation of DPT coverage.**  
 99 Modelling regions were derived from five GBD regions: North Africa and the Middle East, Central sub-Saharan  
 100 Africa, Eastern sub-Saharan Africa, Western sub-Saharan Africa, and Southern sub-Saharan Africa. The GBD  
 101 region of North Africa and the Middle East includes several countries outside of the geographic scope of this study,  
 102 which were excluded: Afghanistan, Bahrain, Iran, Iraq, Jordan, Kuwait, Lebanon, Oman, Palestine, Qatar, Saudi  
 103 Arabia, Syria, Turkey, UAE, and Yemen.  
 104

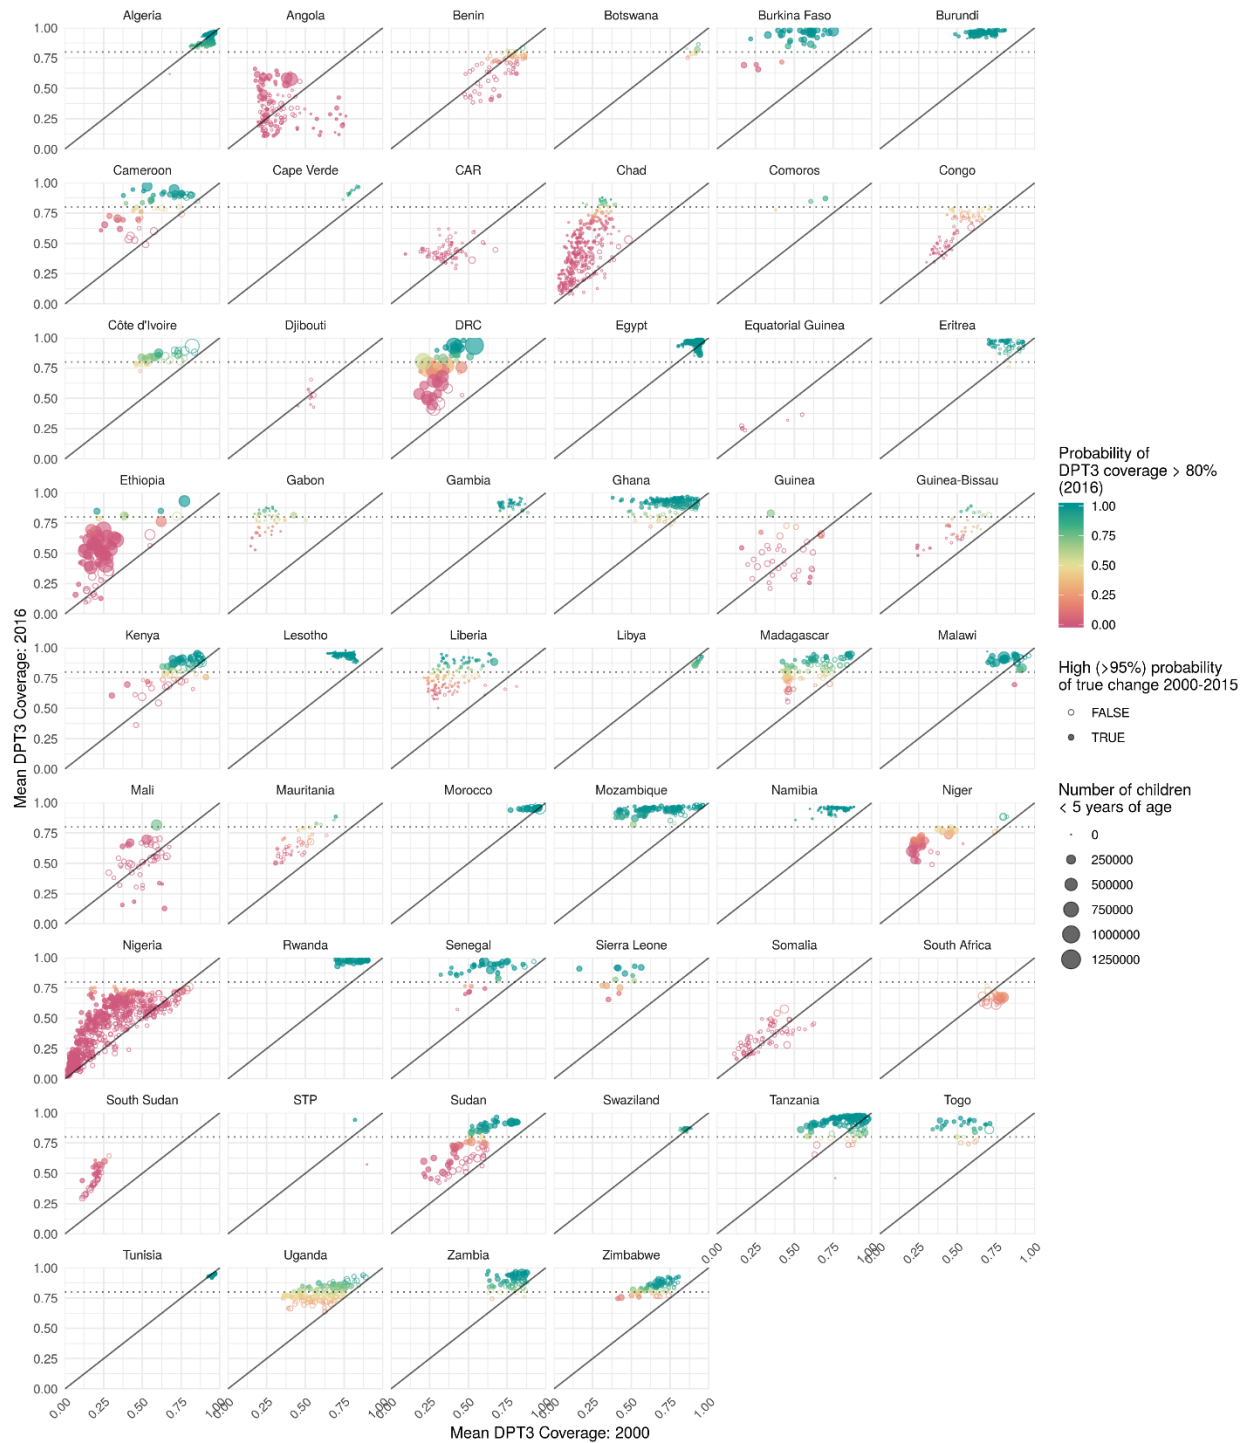

105  
 106  
 107  
 108  
 109  
 110  
 111  
 112  
 113

**eFigure 3: Estimated changes in DPT3 coverage between 2000-2016, by second-level administrative unit.**

Each point represents a single second-level administrative unit, with area proportional to the number of children < 5 years of age and colour representing the posterior probability of DPT3 coverage > 80% in that administrative unit in 2016. Administrative units with a high (> 95%) probability of having experienced a true increase or decrease in DPT3 coverage between 2000-2016 are rendered as filled points, while administrative units with intermediate probabilities of a true change are rendered as hollow circles.

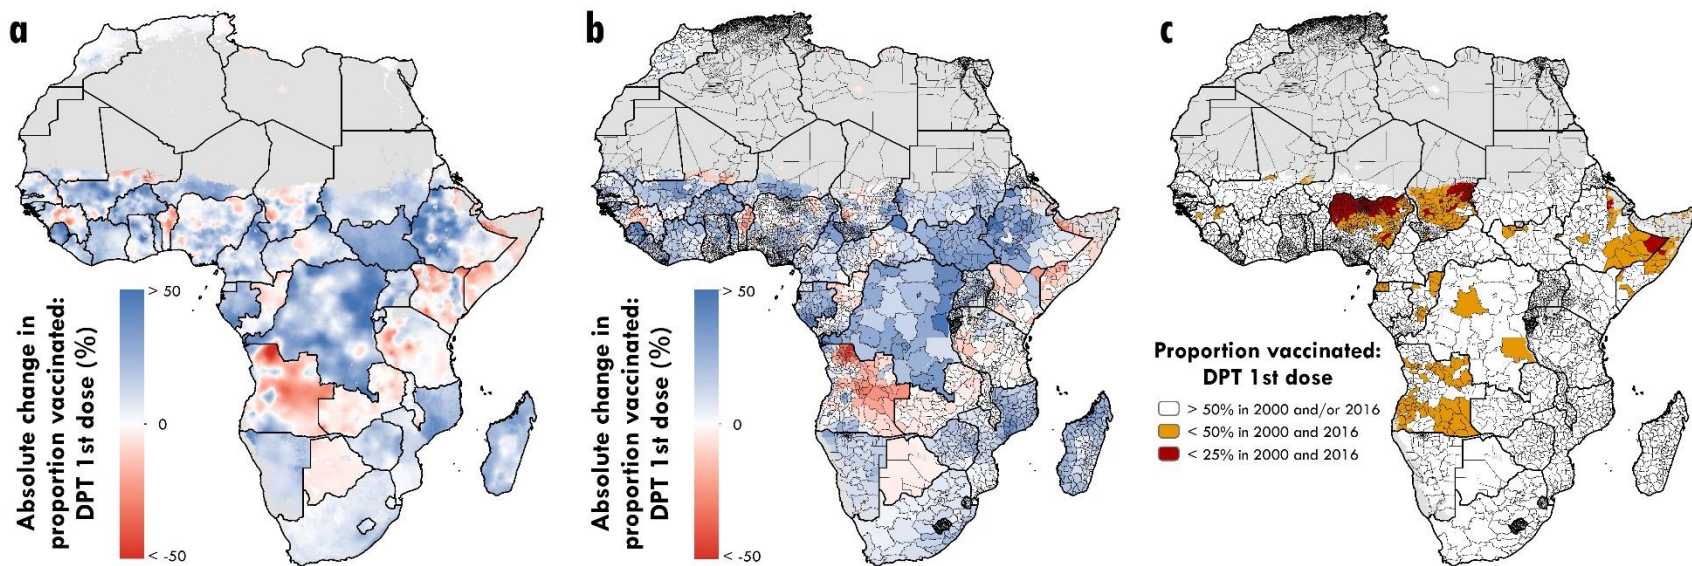

114  
 115 **eFigure 4: Changes in DPT1 coverage in Africa, 2000-2016.**  
 116 Mean estimated change in DPT1 coverage among 12-23 month old children at the 5x5 km resolution between 2000 and 2016 at the 5x5 km (a) and second  
 117 administrative level (b). Colours represent estimated absolute change, in percentage points, where positive changes (coverage increases) are represented in blue  
 118 and negative changes (coverage decreases) in red. Increases and decreases of  $\geq 50$  percentage points are represented by dark blue and dark red, respectively.  
 119 Panel (c) displays areas of low DPT1 coverage over time. Second administrative units with coverage  $< 25\%$  in both 2000 and 2016 are represented in red;  
 120 additional units with coverage  $< 50\%$  in both 2000 and 2016 are represented in orange. Results are masked in grey where total population density was less than  
 121 10 individuals per 1 km pixel in 2015 per WorldPop<sup>1</sup> estimates, or where land cover was classified as “barren or sparsely vegetated” based on MODIS<sup>2</sup> satellite  
 122 data in 2013.



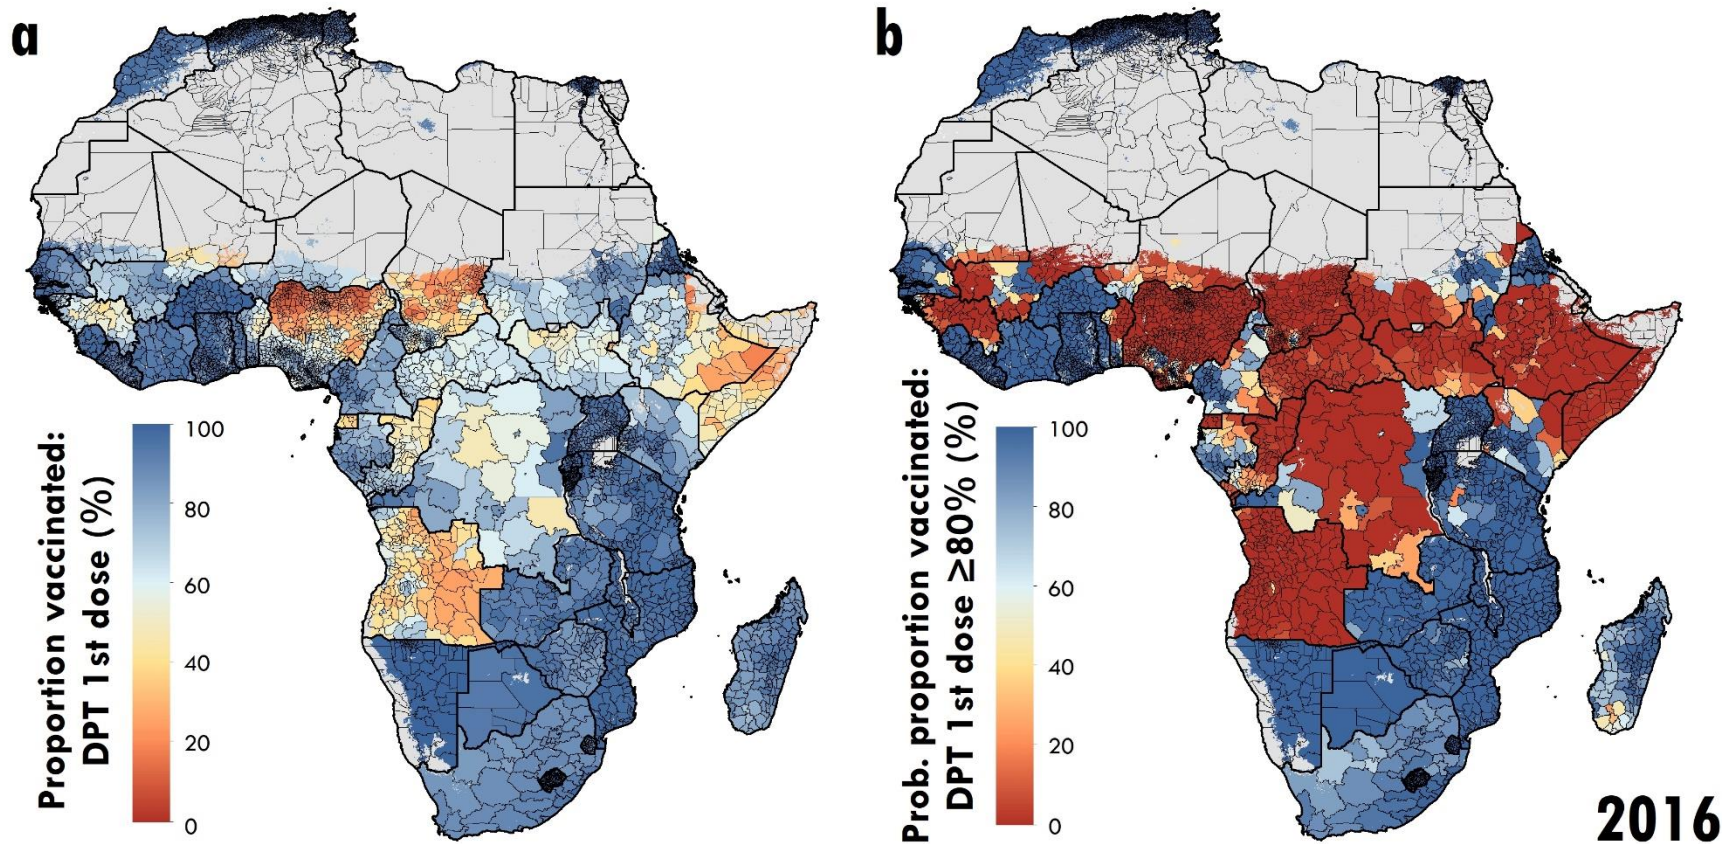

123  
124  
125  
126  
127

**eFigure 5: Administrative-level DPT1 coverage in Africa, 2016**

Estimated DPT1 coverage among 12-23 month old children at the second administrative level (a); probability of second-level administrative unit achieving  $\geq$  80% DPT1 coverage in 2016 (c). Results are masked in grey where total population density was less than 10 individuals per 1x1 km pixel in 2015 per WorldPop<sup>1</sup> estimates, or where land cover was classified as “barren or sparsely vegetated” based on MODIS<sup>2</sup> satellite data in 2013.

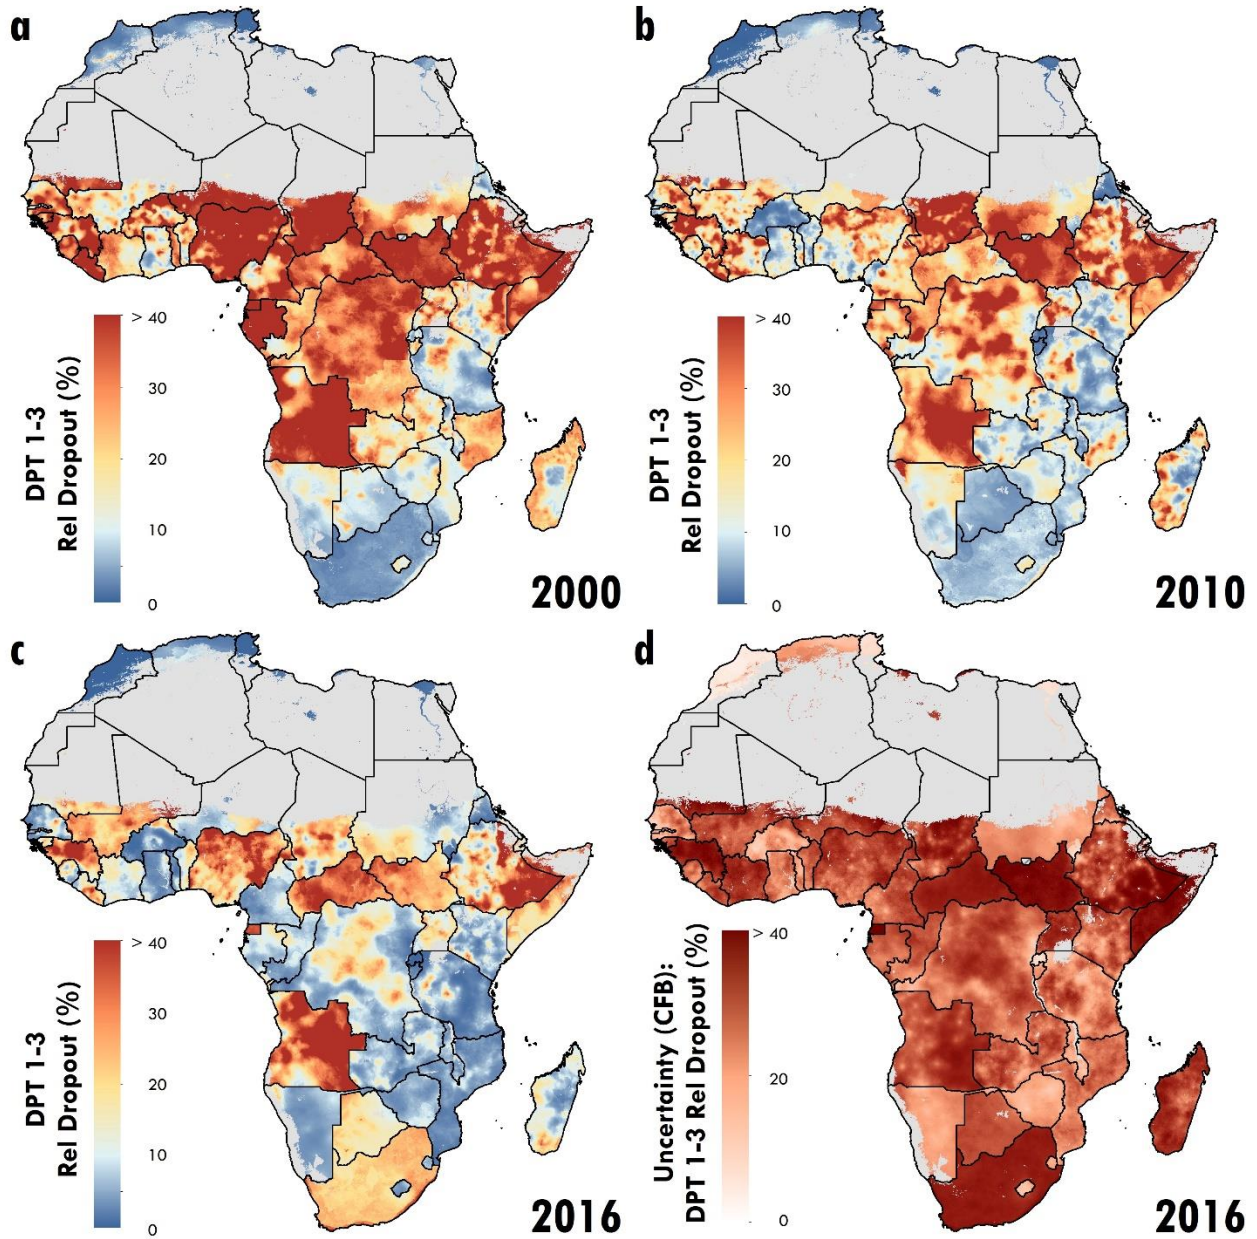

128  
 129 **eFigure 6: Relative DPT1-DPT3 dropout in Africa, 2000-2016.**  
 130 Estimated DPT1-DPT3 relative dropout among 12-23 month old children at the 5x5 kilometre resolution in 2000,  
 131 2010, and 2016 (a-c); model uncertainty in 2016 (d). Model uncertainty is displayed using the Coffey-Feingold-  
 132 Bromberg metric (CFB), a measure of uncertainty that is comparable regardless of mean coverage and scales from  
 133 0% (no uncertainty) to 100% (highest possible uncertainty for a given mean). Results are masked in grey where total  
 134 population density was less than 10 individuals per 1 km pixel in 2015 per WorldPop<sup>1</sup> estimates, or where land  
 135 cover was classified as “barren or sparsely vegetated” based on MODIS<sup>2</sup> satellite data in 2013.

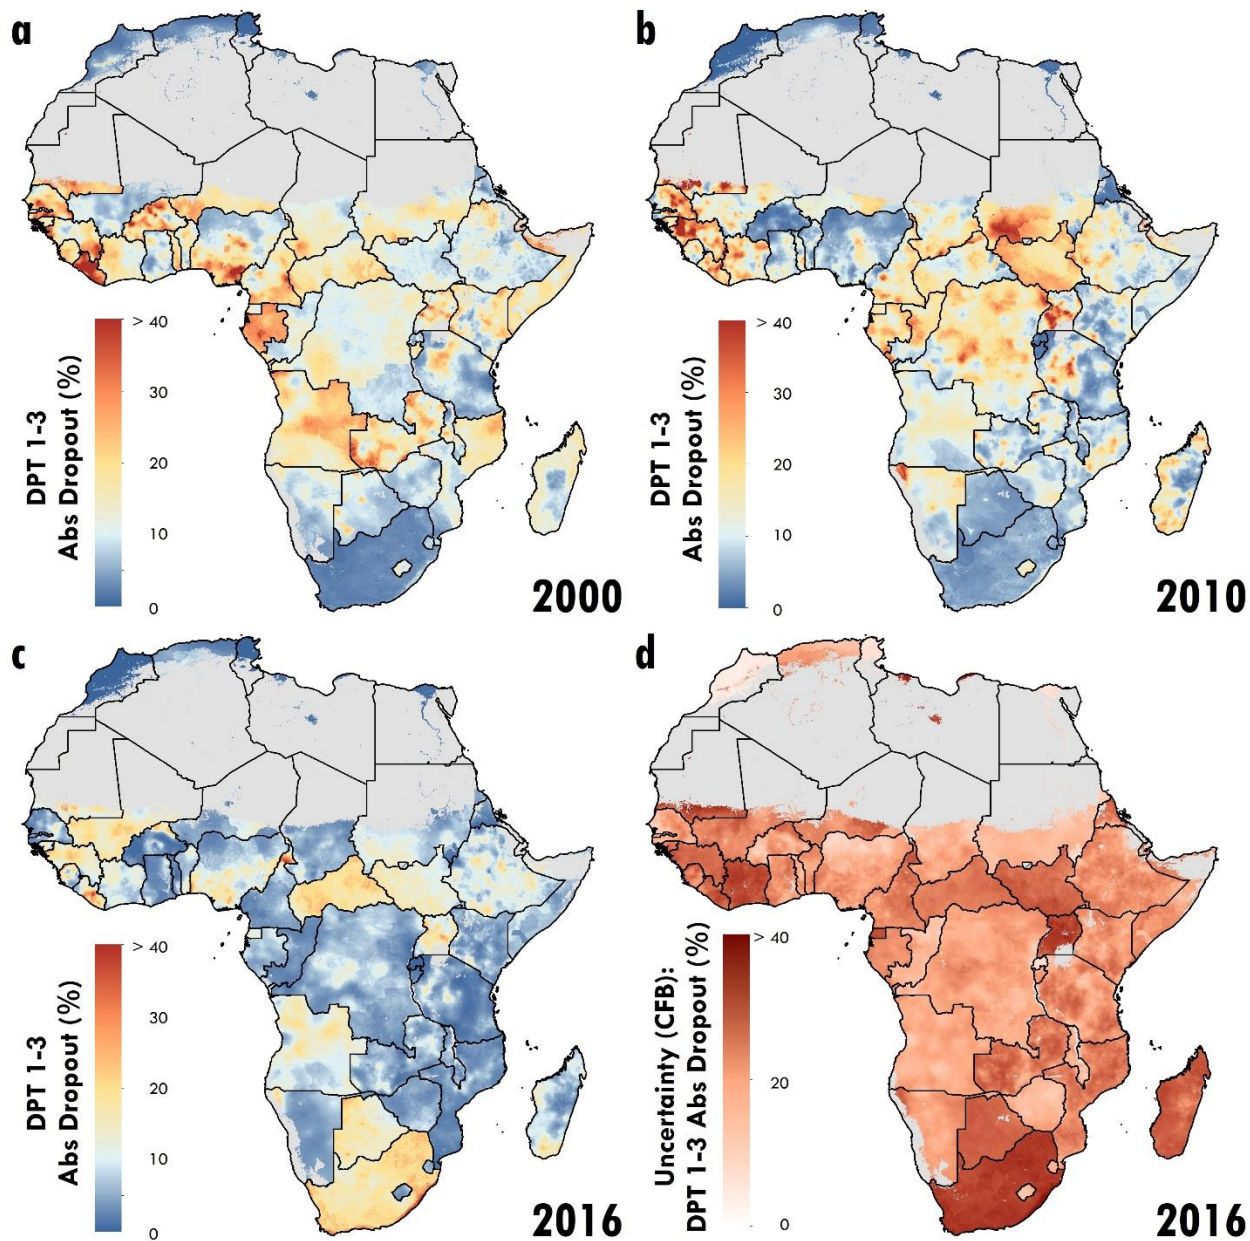

**eFigure 7: Absolute DPT1-DPT3 dropout in Africa, 2000-2016.**

Estimated DPT1-DPT3 relative dropout among 12-23 month old children at the 5x5 kilometre resolution in 2000, 2010, and 2016 (a-c); model uncertainty in 2016 (d). Model uncertainty is displayed using the Coffey-Feingold-Bromberg metric (CFB), a measure of uncertainty that is comparable regardless of mean coverage and scales from 0% (no uncertainty) to 100% (highest possible uncertainty for a given mean). Results are masked in grey where total population density was less than 10 individuals per 1 km pixel in 2015 per WorldPop<sup>1</sup> estimates, or where land cover was classified as “barren or sparsely vegetated” based on MODIS<sup>2</sup> satellite data in 2013.

136  
137  
138  
139  
140  
141  
142  
143  
144  
145

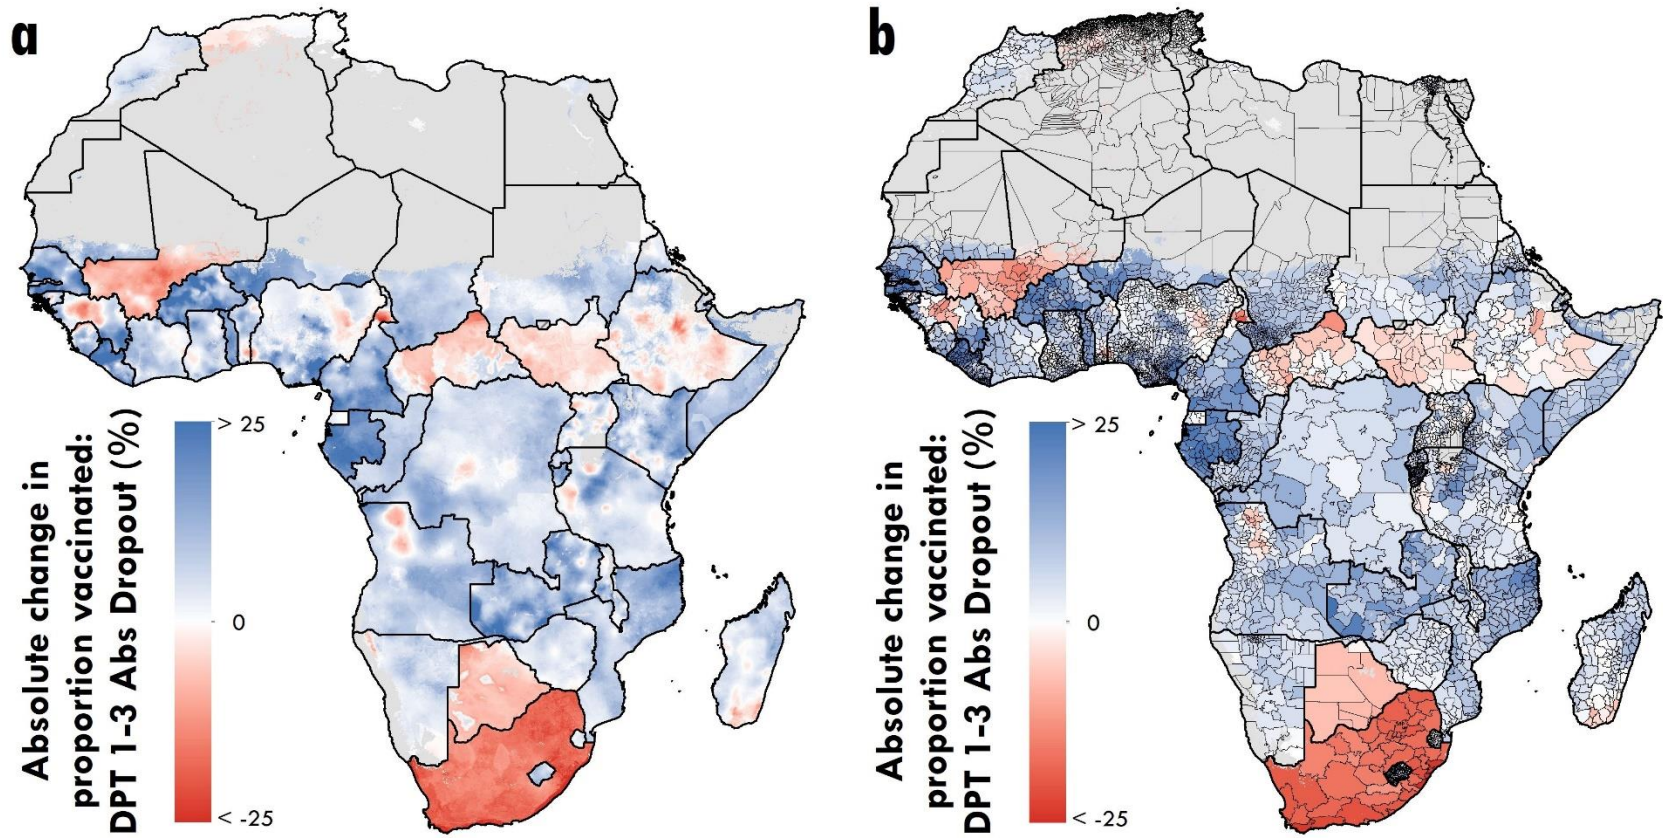

146  
147  
148  
149  
150  
151

**eFigure 8: Estimated changes in DPT1-3 absolute dropout in Africa, 2000-2016.**

Mean estimated change in DPT1-3 absolute dropout among 12-23 month old children at the 5x5 kilometre resolution between 2000 and 2016 at the 5x5 km (a) and second administrative level (b). Results are masked in grey where total population density was less than 10 individuals per 1 km pixel in 2015 per WorldPop<sup>1</sup> estimates, or where land cover was classified as “barren or sparsely vegetated” based on MODIS<sup>2</sup> satellite data in 2013.

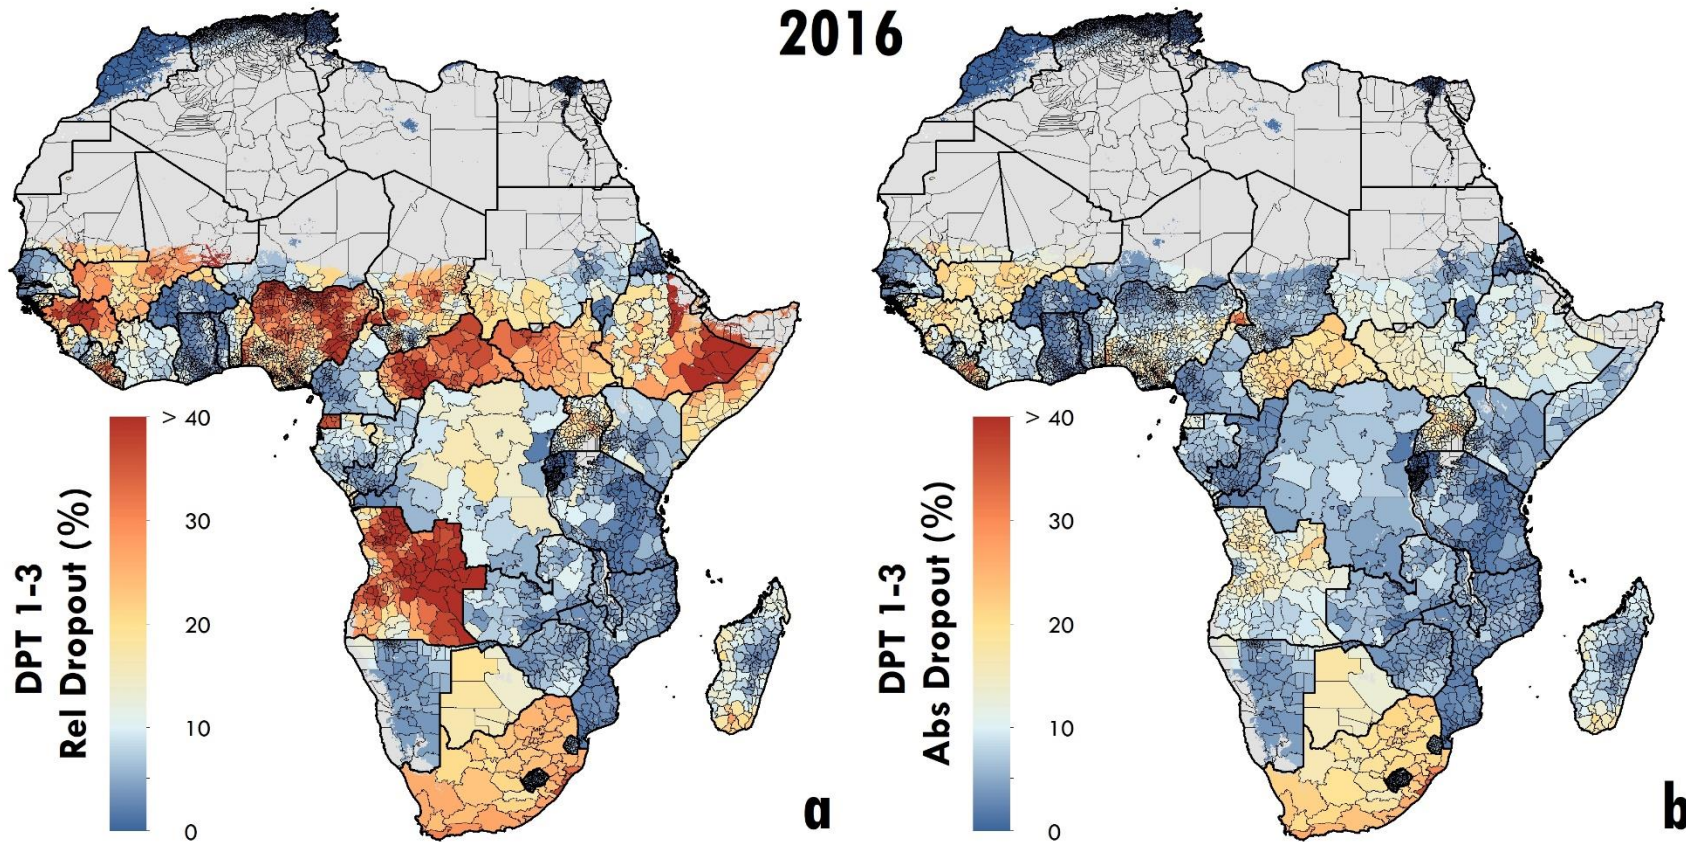

152  
153  
154  
155  
156

**eFigure 9: Administrative-level absolute and relative DPT1-DPT3 dropout in Africa, 2016.**

Estimated DPT1-DPT3 relative dropout (a) and absolute dropout (b) among 12-23 month old children at the second administrative level in 2016. Results are masked in grey where total population density was less than 10 individuals per 1 km pixel in 2015 per WorldPop<sup>1</sup> estimates, or where land cover was classified as “barren or sparsely vegetated” based on MODIS<sup>2</sup> satellite data in 2013.

157  
158  
159  
160  
161

**Supplementary Materials**

**1.0 GATHER checklist**

| Item #                                                                                                | Checklist item                                                                                                                                                                                                                                                                                                                                                                            | Reported on page #                        |
|-------------------------------------------------------------------------------------------------------|-------------------------------------------------------------------------------------------------------------------------------------------------------------------------------------------------------------------------------------------------------------------------------------------------------------------------------------------------------------------------------------------|-------------------------------------------|
| <b>Objectives and funding</b>                                                                         |                                                                                                                                                                                                                                                                                                                                                                                           |                                           |
| 1                                                                                                     | Define the indicator(s), populations (including age, sex, and geographic entities), and time period(s) for which estimates were made.                                                                                                                                                                                                                                                     | 7-9                                       |
| 2                                                                                                     | List the funding sources for the work.                                                                                                                                                                                                                                                                                                                                                    | 18                                        |
| <b>Data Inputs</b>                                                                                    |                                                                                                                                                                                                                                                                                                                                                                                           |                                           |
| <i>For all data inputs from multiple sources that are synthesized as part of the study:</i>           |                                                                                                                                                                                                                                                                                                                                                                                           |                                           |
| 3                                                                                                     | Describe how the data were identified and how the data were accessed.                                                                                                                                                                                                                                                                                                                     | 7-8                                       |
| 4                                                                                                     | Specify the inclusion and exclusion criteria. Identify all ad-hoc exclusions.                                                                                                                                                                                                                                                                                                             | 7-8; Supplementary Information (SI) 34-35 |
| 5                                                                                                     | Provide information on all included data sources and their main characteristics. For each data source used, report reference information or contact name/institution, population represented, data collection method, year(s) of data collection, sex and age range, diagnostic criteria or measurement method, and sample size, as relevant.                                             | SI 16-43                                  |
| 6                                                                                                     | Identify and describe any categories of input data that have potentially important biases (e.g., based on characteristics listed in item 5).                                                                                                                                                                                                                                              | SI 18-44                                  |
| <i>For data inputs that contribute to the analysis but were not synthesized as part of the study:</i> |                                                                                                                                                                                                                                                                                                                                                                                           |                                           |
| 7                                                                                                     | Describe and give sources for any other data inputs.                                                                                                                                                                                                                                                                                                                                      | SI 48-51                                  |
| <i>For all data inputs:</i>                                                                           |                                                                                                                                                                                                                                                                                                                                                                                           |                                           |
| 8                                                                                                     | Provide all data inputs in a file format from which data can be efficiently extracted (e.g., a spreadsheet rather than a PDF), including all relevant meta-data listed in item 5. For any data inputs that cannot be shared because of ethical or legal reasons, such as third-party ownership, provide a contact name or the name of the institution that retains the right to the data. | SI 18-43                                  |
| <b>Data analysis</b>                                                                                  |                                                                                                                                                                                                                                                                                                                                                                                           |                                           |
| 9                                                                                                     | Provide a conceptual overview of the data analysis method. A diagram may be helpful.                                                                                                                                                                                                                                                                                                      | SI 45                                     |
| 10                                                                                                    | Provide a detailed description of all steps of the analysis, including mathematical formulae. This description should cover, as relevant, data cleaning, data pre-processing, data adjustments and weighting of data sources, and mathematical or statistical model(s).                                                                                                                   | SI 44-46, 53-92                           |
| 11                                                                                                    | Describe how candidate models were evaluated and how the final model(s) were selected.                                                                                                                                                                                                                                                                                                    | 9, SI 68-82                               |
| 12                                                                                                    | Provide the results of an evaluation of model performance, if done, as well as the results of any relevant sensitivity analysis.                                                                                                                                                                                                                                                          | SI 68-92                                  |
| 13                                                                                                    | Describe methods for calculating uncertainty of the estimates. State which sources of uncertainty were, and were not, accounted for in the uncertainty analysis.                                                                                                                                                                                                                          | 7, SI 61-62                               |
| 14                                                                                                    | State how analytic or statistical source code used to generate estimates can be accessed.                                                                                                                                                                                                                                                                                                 | 7                                         |
| <b>Results and Discussion</b>                                                                         |                                                                                                                                                                                                                                                                                                                                                                                           |                                           |
| 15                                                                                                    | Provide published estimates in a file format from which data can be efficiently extracted.                                                                                                                                                                                                                                                                                                | 7                                         |
| 16                                                                                                    | Report a quantitative measure of the uncertainty of the estimates (e.g. uncertainty intervals).                                                                                                                                                                                                                                                                                           | 7-11                                      |
| 17                                                                                                    | Interpret results in light of existing evidence. If updating a previous set of estimates, describe the reasons for changes in estimates.                                                                                                                                                                                                                                                  | 11-14                                     |
| 18                                                                                                    | Discuss limitations of the estimates. Include a discussion of any modelling assumptions or data limitations that affect interpretation of the estimates.                                                                                                                                                                                                                                  | 13-14                                     |

162  
163  
164  
165  
166

**2.0 STROBE checklist**

|                           | Item No | Recommendation                                                                                      | Reported on Page # |
|---------------------------|---------|-----------------------------------------------------------------------------------------------------|--------------------|
| <b>Title and abstract</b> | 1       | (a) Indicate the study's design with a commonly used term in the title or the abstract              | 1-3                |
|                           |         | (b) Provide in the abstract an informative and balanced summary of what was done and what was found | 3                  |
| <b>Introduction</b>       |         |                                                                                                     | <b>6</b>           |
| Background/rationale      | 2       | Explain the scientific background and rationale for the investigation being reported                | 6                  |
| Objectives                | 3       | State specific objectives, including any prespecified hypotheses                                    | 7                  |
| <b>Methods</b>            |         |                                                                                                     | <b>7</b>           |

|                              |    |                                                                                                                                                                                                                                                                                                                                                                                                                                                                        |                                           |
|------------------------------|----|------------------------------------------------------------------------------------------------------------------------------------------------------------------------------------------------------------------------------------------------------------------------------------------------------------------------------------------------------------------------------------------------------------------------------------------------------------------------|-------------------------------------------|
| Study design                 | 4  | Present key elements of study design early in the paper                                                                                                                                                                                                                                                                                                                                                                                                                | 7-9                                       |
| Setting                      | 5  | Describe the setting, locations, and relevant dates, including periods of recruitment, exposure, follow-up, and data collection                                                                                                                                                                                                                                                                                                                                        | 7-9                                       |
| Participants                 | 6  | (a) <i>Cohort study</i> —Give the eligibility criteria, and the sources and methods of selection of participants. Describe methods of follow-up<br><i>Case-control study</i> —Give the eligibility criteria, and the sources and methods of case ascertainment and control selection. Give the rationale for the choice of cases and controls<br><i>Cross-sectional study</i> —Give the eligibility criteria, and the sources and methods of selection of participants | 7-8, Supplementary Information (SI) 24-42 |
|                              |    | (b) <i>Cohort study</i> —For matched studies, give matching criteria and number of exposed and unexposed. <sup>31</sup><br><i>Case-control study</i> —For matched studies, give matching criteria and the number of controls per case                                                                                                                                                                                                                                  | NA                                        |
| Variables                    | 7  | Clearly define all outcomes, exposures, predictors, potential confounders, and effect modifiers. Give diagnostic criteria, if applicable                                                                                                                                                                                                                                                                                                                               | 7-9                                       |
| Data sources/<br>measurement | 8* | For each variable of interest, give sources of data and details of methods of assessment (measurement). Describe comparability of assessment methods if there is more than one group                                                                                                                                                                                                                                                                                   | 7-9, SI 17-43                             |
| Bias                         | 9  | Describe any efforts to address potential sources of bias                                                                                                                                                                                                                                                                                                                                                                                                              | SI 18-44                                  |
| Study size                   | 10 | Explain how the study size was arrived at                                                                                                                                                                                                                                                                                                                                                                                                                              | 7-8                                       |
| Quantitative<br>variables    | 11 | Explain how quantitative variables were handled in the analyses. If applicable, describe which groupings were chosen and why                                                                                                                                                                                                                                                                                                                                           | 8-9                                       |
| Statistical methods          | 12 | (a) Describe all statistical methods, including those used to control for confounding                                                                                                                                                                                                                                                                                                                                                                                  | 8-9                                       |
|                              |    | (b) Describe any methods used to examine subgroups and interactions                                                                                                                                                                                                                                                                                                                                                                                                    | 8-9                                       |
|                              |    | (c) Explain how missing data were addressed                                                                                                                                                                                                                                                                                                                                                                                                                            | 8-9                                       |
|                              |    | (d) <i>Cohort study</i> —If applicable, explain how loss to follow-up was addressed<br><i>Case-control study</i> —If applicable, explain how matching of cases and controls was addressed<br><i>Cross-sectional study</i> —If applicable, describe analytical methods taking account of sampling strategy                                                                                                                                                              | SI 44-46, 53-92                           |
|                              |    | (e) Describe any sensitivity analyses                                                                                                                                                                                                                                                                                                                                                                                                                                  | SI 68-92                                  |

167

| <b>Results</b>   |     |                                                                                                                                                                                                              |                                                                                       |
|------------------|-----|--------------------------------------------------------------------------------------------------------------------------------------------------------------------------------------------------------------|---------------------------------------------------------------------------------------|
| Participants     | 13* | (a) Report numbers of individuals at each stage of study—eg numbers potentially eligible, examined for eligibility, confirmed eligible, included in the study, completing follow-up, and analysed            | 7, SI 43                                                                              |
|                  |     | (b) Give reasons for non-participation at each stage                                                                                                                                                         | Non-participation reasons largely unknown; see individual survey reports for details. |
|                  |     | (c) Consider use of a flow diagram                                                                                                                                                                           | SI 43                                                                                 |
| Descriptive data | 14* | (a) Give characteristics of study participants (eg demographic, clinical, social) and information on exposures and potential confounders                                                                     | Varies by survey; see individual survey reports for details                           |
|                  |     | (b) Indicate number of participants with missing data for each variable of interest                                                                                                                          | SI 43                                                                                 |
|                  |     | (c) <i>Cohort study</i> —Summarise follow-up time (eg, average and total amount)                                                                                                                             | NA                                                                                    |
| Outcome data     | 15* | <i>Cohort study</i> —Report numbers of outcome events or summary measures over time                                                                                                                          | NA                                                                                    |
|                  |     | <i>Case-control study</i> —Report numbers in each exposure category, or summary measures of exposure                                                                                                         | NA                                                                                    |
|                  |     | <i>Cross-sectional study</i> —Report numbers of outcome events or summary measures                                                                                                                           | SI 44-46, 53-92                                                                       |
| Main results     | 16  | (a) Give unadjusted estimates and, if applicable, confounder-adjusted estimates and their precision (eg, 95% confidence interval). Make clear which confounders were adjusted for and why they were included | 7, SI 61-62                                                                           |
|                  |     | (b) Report category boundaries when continuous variables were categorized                                                                                                                                    | SI 35, SI 40                                                                          |
|                  |     | (c) If relevant, consider translating estimates of relative risk into absolute risk for a meaningful time period                                                                                             | NA                                                                                    |
| Other analyses   | 17  | Report other analyses done—eg analyses of subgroups and interactions, and sensitivity analyses                                                                                                               | SI 68-92                                                                              |

|                          |           |                                                                                                                                                                            |           |
|--------------------------|-----------|----------------------------------------------------------------------------------------------------------------------------------------------------------------------------|-----------|
| <b>Discussion</b>        |           |                                                                                                                                                                            | <b>14</b> |
| Key results              | <b>18</b> | Summarise key results with reference to study objectives                                                                                                                   | 3-5       |
| Limitations              | <b>19</b> | Discuss limitations of the study, taking into account sources of potential bias or imprecision. Discuss both direction and magnitude of any potential bias                 | 16-17     |
| Interpretation           | <b>20</b> | Give a cautious overall interpretation of results considering objectives, limitations, multiplicity of analyses, results from similar studies, and other relevant evidence | 14-16     |
| Generalisability         | <b>21</b> | Discuss the generalisability (external validity) of the study results                                                                                                      | 14-15     |
| <b>Other information</b> |           |                                                                                                                                                                            |           |
| Funding                  | <b>22</b> | Give the source of funding and the role of the funders for the present study and, if applicable, for the original study on which the present article is based              | 17        |

168

169

170

171

172

173

174

175

176

177

178

179

180

181

182

**3.0 Data Sources and Processing**

The sources of data used to model vaccine coverage are described below in Supplementary Table 1 along with the number of individuals and clusters included as well as information about the spatial resolution available (GPS-located or areal data). Of 183 surveys, 88 were from the Demographic and Health (DHS) series, 73 from the UNICEF Multiple Indicator Cluster Survey (MICS) series, and 22 from other sources. eFigure 1 shows the spatial and temporal extent of data availability by country.

Note that in three countries (South Africa, Libya, and Cape Verde), no data were identified meeting the inclusion and exclusion criteria described below. In these places, coverage estimates are produced from the relationships between DPT coverage and covariates (from other countries within the modelling region) and national-level estimates of coverage from the Global Burden of Disease study.



183  
184  
185  
186

**Supplementary Table 1: Household surveys used in mapping vaccine coverage.**

Sources can be located in the Global Health Data Exchange (GHDx, <http://ghdx.healthdata.org>) through the provided hyperlinks. The GHDx contains additional information about each survey source and links to the underlying source data where publicly available.

| Country | GPS-located clusters | Areally-located clusters | Number of children included | Series                                             | Year(s)   | Citation                                                                                                                                                                                                                                      | Link                 |
|---------|----------------------|--------------------------|-----------------------------|----------------------------------------------------|-----------|-----------------------------------------------------------------------------------------------------------------------------------------------------------------------------------------------------------------------------------------------|----------------------|
| Algeria | 0                    | 496                      | 1911                        | Pan Arab Project for Family Health (PAPFAM)        | 2002-2003 | National Office of Statistics (Algeria), Ministry of Health, Population and Hospital Reform (Algeria), League of Arab States. Algeria Family Health Survey 2002-2003.                                                                         | <a href="#">GHDx</a> |
| Algeria | 0                    | 1119                     | 11042                       | Multiple Indicator Cluster Survey (MICS)           | 2012-2013 | Ministry of Health and Population (Algeria), United Nations Children's Fund (UNICEF). Algeria Multiple Indicator Cluster Survey 2012-2013. New York, United States: United Nations Children's Fund (UNICEF), 2016.                            | <a href="#">GHDx</a> |
| Angola  | 0                    | 330                      | 2240                        | Multiple Indicator Cluster Survey (MICS)           | 2001      | National Institute of Statistics (Angola), United Nations Children's Fund (UNICEF). Angola Multiple Indicator Cluster Survey 2001. New York, United States: United Nations Children's Fund (UNICEF).                                          | <a href="#">GHDx</a> |
| Angola  | 0                    | 18                       | 6167                        | Angola Integrated Inquiry into People's Well-Being | 2008-2009 | National Institute of Statistics (Angola), Oxford Policy Management, United Nations Children's Fund (UNICEF). Angola Integrated Inquiry into People's Well-Being 2008-2009.                                                                   | <a href="#">GHDx</a> |
| Angola  | 624                  | 0                        | 5425                        | Demographic and Health Survey (DHS)                | 2015-2016 | ICF International, Ministry of Health (Angola), National Institute of Statistics (Angola), United Nations Children's Fund (UNICEF). Angola Demographic and Health Survey 2015-2016. Fairfax, United States: ICF International, 2017.          | <a href="#">GHDx</a> |
| Benin   | 243                  | 0                        | 1854                        | Demographic and Health Survey (DHS)                | 2001      | National Institute of Statistics and Economic Analysis (INSAE) (Benin), ORC Macro. Benin Demographic and Health Survey 2001. Calverton, United States: ORC Macro.                                                                             | <a href="#">GHDx</a> |
| Benin   | 0                    | 750                      | 11234                       | Demographic and Health Survey (DHS)                | 2006      | National Institute of Statistics and Economic Analysis (INSAE) (Benin), National Program Against AIDS (PNLS) (Benin), Macro International, Inc. Benin Demographic and Health Survey 2006. Calverton, United States: Macro International, Inc. | <a href="#">GHDx</a> |
| Benin   | 746                  | 0                        | 9844                        | Demographic and Health Survey (DHS)                | 2011-2012 | ICF International, National Institute of Statistics and Economic Analysis (INSAE) (Benin), National Program Against AIDS (PNLS) (Benin). Benin Demographic and Health Survey 2011-2012. Fairfax, United States: ICF International, 2014.      | <a href="#">GHDx</a> |
| Benin   | 0                    | 723                      | 4612                        | Multiple Indicator Cluster Survey (MICS)           | 2014      | National Institute of Statistics and Economic Analysis (INSAE) (Benin), United Nations Children's Fund (UNICEF). Benin Multiple Indicator Cluster Survey 2014. New York, United States: United Nations Children's Fund (UNICEF), 2017.        | <a href="#">GHDx</a> |

| Country      | GPS-located clusters | Areally-located clusters | Number of children included | Series                                                                            | Year(s)   | Citation                                                                                                                                                                                                                                                 | Link                 |
|--------------|----------------------|--------------------------|-----------------------------|-----------------------------------------------------------------------------------|-----------|----------------------------------------------------------------------------------------------------------------------------------------------------------------------------------------------------------------------------------------------------------|----------------------|
| Botswana     | 0                    | 21                       | 544                         | Multiple Indicator Cluster Survey (MICS)                                          | 2000      | Central Statistics Office (Botswana), United Nations Children's Fund (UNICEF). Botswana Multiple Indicator Cluster Survey 2000. New York, United States: United Nations Children's Fund (UNICEF), 2015.                                                  | <a href="#">GHDx</a> |
| Botswana     | 0                    | 358                      | 1790                        | Botswana Family Health Survey                                                     | 2007-2008 | Central Statistics Office (Botswana). Botswana Family Health Survey 2007-2008. Gaborone, Botswana: Central Statistics Office (Botswana), 2009.                                                                                                           | <a href="#">GHDx</a> |
| Burkina Faso | 397                  | 0                        | 7133                        | Demographic and Health Survey (DHS)                                               | 2003      | Macro International, Inc, National Institute of Statistics and Demography (Burkina Faso). Burkina Faso Demographic and Health Survey 2003. Calverton, United States: Macro International, Inc.                                                           | <a href="#">GHDx</a> |
| Burkina Faso | 0                    | 422                      | 4537                        | Core Welfare Indicators Questionnaire Survey (CWIQ)                               | 2005      | National Institute of Statistics and Demography (Burkina Faso), World Bank. Burkina Faso Core Welfare Indicators Questionnaire Survey 2005. Ouagadougou, Burkina Faso: National Institute of Statistics and Demography (Burkina Faso).                   | <a href="#">GHDx</a> |
| Burkina Faso | 195                  | 0                        | 3519                        | Multiple Indicator Cluster Survey (MICS)                                          | 2006      | National Institute of Statistics and Demography (Burkina Faso), United Nations Children's Fund (UNICEF). Burkina Faso Multiple Indicator Cluster Survey 2006. New York, United States: United Nations Children's Fund (UNICEF).                          | <a href="#">GHDx</a> |
| Burkina Faso | 0                    | 424                      | 5128                        | Core Welfare Indicators Questionnaire Survey (CWIQ)                               | 2007      | National Institute of Statistics and Demography (INSD). Burkina Faso Core Welfare Indicators Questionnaire Survey 2007. Ouagadougou, Burkina Faso: National Institute of Statistics and Demography (INSD), 2008.                                         | <a href="#">GHDx</a> |
| Burkina Faso | 0                    | 324                      | 5156                        | Global Fund Household Health Coverage Survey                                      | 2008      | Global Fund to Fight Aids Tuberculosis and Malaria (GFATM). Burkina Faso Global Fund Household Health Coverage Survey 2008.                                                                                                                              | <a href="#">GHDx</a> |
| Burkina Faso | 541                  | 0                        | 10132                       | Demographic and Health Survey (DHS)                                               | 2010-2011 | ICF Macro, Ministry of Health (Burkina Faso), National Institute of Statistics and Demography (Burkina Faso). Burkina Faso Demographic and Health Survey 2010-2011. Calverton, United States: ICF Macro.                                                 | <a href="#">GHDx</a> |
| Burkina Faso | 0                    | 890                      | 9124                        | Living Standards Measurement Study - Integrated Surveys on Agriculture (LSMS-ISA) | 2014      | National Institute of Statistics and Demography (Burkina Faso), World Bank. Burkina Faso Continuous Multisectoral Survey 2014. Washington DC, United States: World Bank.                                                                                 | <a href="#">GHDx</a> |
| Burundi      | 0                    | 547                      | 4595                        | Multiple Indicator Cluster Survey (MICS)                                          | 2005      | United Nations Children's Fund (UNICEF), Burundi Institute of Statistics and Economic Studies, United Nations Population Fund (UNFPA). Burundi Multiple Indicator Cluster Survey 2005. New York, United States: United Nations Children's Fund (UNICEF). | <a href="#">GHDx</a> |
| Burundi      | 376                  | 0                        | 5732                        | Demographic and Health Survey (DHS)                                               | 2010-2011 | Burundi Institute of Statistics and Economic Studies, ICF International, Ministry of Public Health and the Fight against AIDS (Burundi). Burundi Demographic and Health Survey 2010-2011. Fairfax, United States: ICF International, 2012.               | <a href="#">GHDx</a> |

| Country                  | GPS-located clusters | Areally-located clusters | Number of children included | Series                                   | Year(s)   | Citation                                                                                                                                                                                                                                                                                                                                    | Link                 |
|--------------------------|----------------------|--------------------------|-----------------------------|------------------------------------------|-----------|---------------------------------------------------------------------------------------------------------------------------------------------------------------------------------------------------------------------------------------------------------------------------------------------------------------------------------------------|----------------------|
| Cameroon                 | 0                    | 140                      | 670                         | Multiple Indicator Cluster Survey (MICS) | 2000      | Department of Statistics and Accounting, Ministry of the Economy and Finance (Cameroon) and United Nations Children's Fund (UNICEF). Cameroon Multiple Indicator Cluster Survey 2000. New York, United States: United Nations Children's Fund (UNICEF).                                                                                     | <a href="#">GHDx</a> |
| Cameroon                 | 460                  | 0                        | 5590                        | Demographic and Health Survey (DHS)      | 2004      | Macro International, Inc, National Institute of Statistics (Cameroon). Cameroon Demographic and Health Survey 2004. Calverton, United States: Macro International, Inc.                                                                                                                                                                     | <a href="#">GHDx</a> |
| Cameroon                 | 0                    | 459                      | 3867                        | Multiple Indicator Cluster Survey (MICS) | 2006      | United Nations Children's Fund (UNICEF), National Institute of Statistics (Cameroon). Cameroon Multiple Indicator Cluster Survey 2006. New York, United States: United Nations Children's Fund (UNICEF).                                                                                                                                    | <a href="#">GHDx</a> |
| Cameroon                 | 576                  | 0                        | 8258                        | Demographic and Health Survey (DHS)      | 2011      | ICF International, Ministry of Economy, Planning and Regional Development (Cameroon), Ministry of Public Health (Cameroon), National Institute of Statistics (Cameroon), Pasteur Center of Cameroon. Cameroon Demographic and Health Survey 2011. Fairfax, United States: ICF International.                                                | <a href="#">GHDx</a> |
| Cameroon                 | 0                    | 471                      | 2536                        | Multiple Indicator Cluster Survey (MICS) | 2014      | Ministry of Public Health (Cameroon), National Institute of Statistics (Cameroon), United Nations Children's Fund (UNICEF). Cameroon Multiple Indicator Cluster Survey 2014. New York, United States: United Nations Children's Fund (UNICEF), 2017.                                                                                        | <a href="#">GHDx</a> |
| Central African Republic | 0                    | 500                      | 2865                        | Multiple Indicator Cluster Survey (MICS) | 2000      | Division of Statistics and Economic Studies (Central African Republic), Ministry of Economy, Planning and International Cooperation (Central African Republic), United Nations Children's Fund (UNICEF). Central African Republic Multiple Indicator Cluster Survey 2000. New York, United States: United Nations Children's Fund (UNICEF). | <a href="#">GHDx</a> |
| Central African Republic | 0                    | 265                      | 5565                        | Multiple Indicator Cluster Survey (MICS) | 2006      | United Nations Children's Fund (UNICEF). Central African Republic Multiple Indicator Cluster Survey 2006. New York, United States: United Nations Children's Fund (UNICEF).                                                                                                                                                                 | <a href="#">GHDx</a> |
| Central African Republic | 0                    | 428                      | 6329                        | Multiple Indicator Cluster Survey (MICS) | 2010-2011 | Central African Institute of Statistics, Economic and Social Studies (ICASEES) (Central African Republic), ICF International. Central African Republic Multiple Indicator Cluster Survey 2010-2011. Fairfax, United States: ICF International, 2013.                                                                                        | <a href="#">GHDx</a> |
| Chad                     | 0                    | 174                      | 936                         | Multiple Indicator Cluster Survey (MICS) | 2000      | United Nations Children's Fund (UNICEF), Census Bureau (Chad), National Institute of Statistical, Economic and Demographic Studies (Chad). Chad Multiple Indicator Cluster Survey 2000. New York, United States: United Nations Children's Fund (UNICEF).                                                                                   | <a href="#">GHDx</a> |

| Country                          | GPS-located clusters | Areally-located clusters | Number of children included | Series                                   | Year(s)   | Citation                                                                                                                                                                                                                                                                                                       | Link                 |
|----------------------------------|----------------------|--------------------------|-----------------------------|------------------------------------------|-----------|----------------------------------------------------------------------------------------------------------------------------------------------------------------------------------------------------------------------------------------------------------------------------------------------------------------|----------------------|
| Chad                             | 0                    | 196                      | 3756                        | Demographic and Health Survey (DHS)      | 2004      | Macro International, Inc, National Institute of Statistical, Economic and Demographic Studies (Chad). Chad Demographic and Health Survey 2004. Calverton, United States: Macro International, Inc.                                                                                                             | <a href="#">GHDx</a> |
| Chad                             | 0                    | 459                      | 9967                        | Multiple Indicator Cluster Survey (MICS) | 2010      | Ministry of Planning, Economy, and International Cooperation (Chad), National Institute of Statistical, Economic and Demographic Studies (Chad), United Nations Children's Fund (UNICEF). Chad Multiple Indicator Cluster Survey 2010. New York, United States: United Nations Children's Fund (UNICEF), 2014. | <a href="#">GHDx</a> |
| Chad                             | 624                  | 0                        | 13057                       | Demographic and Health Survey (DHS)      | 2014-2015 | ICF International, National Institute of Statistical, Economic and Demographic Studies (Chad). Chad Demographic and Health Survey 2014-2015. Fairfax, United States: ICF International, 2016.                                                                                                                  | <a href="#">GHDx</a> |
| Comoros                          | 0                    | 218                      | 951                         | Multiple Indicator Cluster Survey (MICS) | 2000      | United Nations Development Programme (UNDP), United Nations Children's Fund (UNICEF). Comoros Multiple Indicator Cluster Survey 2000. New York, United States: United Nations Children's Fund (UNICEF).                                                                                                        | <a href="#">GHDx</a> |
| Comoros                          | 242                  | 0                        | 2196                        | Demographic and Health Survey (DHS)      | 2012-2013 | General Directorate of Statistics and Forecasting (Comoros), ICF International. Comoros Demographic and Health Survey 2012-2013. Fairfax, United States: ICF International, 2014.                                                                                                                              | <a href="#">GHDx</a> |
| Congo                            | 0                    | 384                      | 6876                        | Demographic and Health Survey (DHS)      | 2011-2012 | ICF International, Ministry of Health (Congo, Rep.), National Center for Statistics and Economic Studies (Congo, Rep.). Congo Demographic and Health Survey 2011-2012. Fairfax, United States: ICF International, 2013.                                                                                        | <a href="#">GHDx</a> |
| Cote d'Ivoire                    | 0                    | 289                      | 1572                        | Multiple Indicator Cluster Survey (MICS) | 2000      | National School for Statistics and Economics Applied (ENSEA), United Nations Children's Fund (UNICEF), United Nations Educational, Scientific and Cultural Organization (UNESCO). Côte d'Ivoire Multiple Indicator Cluster Survey 2000. New York, United States: United Nations Children's Fund (UNICEF).      | <a href="#">GHDx</a> |
| Cote d'Ivoire                    | 0                    | 304                      | 5457                        | Multiple Indicator Cluster Survey (MICS) | 2006      | United Nations Children's Fund (UNICEF), National Institute of Statistics (Côte d'Ivoire). Côte d'Ivoire Multiple Indicator Cluster Survey 2006. New York, United States: United Nations Children's Fund (UNICEF).                                                                                             | <a href="#">GHDx</a> |
| Cote d'Ivoire                    | 341                  | 0                        | 5252                        | Demographic and Health Survey (DHS)      | 2011-2012 | ICF International, Ministry of the Fight Against AIDS (Côte d'Ivoire), National Institute of Statistics (Côte d'Ivoire). Côte d'Ivoire Demographic and Health Survey 2011-2012. Fairfax, United States: ICF International, 2013.                                                                               | <a href="#">GHDx</a> |
| Democratic Republic of the Congo | 0                    | 285                      | 1601                        | Multiple Indicator Cluster Survey (MICS) | 2001      | Ministry of Planning and Reconstruction (Congo, DR), United Nations Children's Fund (UNICEF). Congo, DR Multiple Indicator Cluster Survey 2001. New York, United States: United Nations Children's Fund (UNICEF).                                                                                              | <a href="#">GHDx</a> |

| Country                          | GPS-located clusters | Areally-located clusters | Number of children included | Series                                      | Year(s)   | Citation                                                                                                                                                                                                                                                                                                                          | Link                 |
|----------------------------------|----------------------|--------------------------|-----------------------------|---------------------------------------------|-----------|-----------------------------------------------------------------------------------------------------------------------------------------------------------------------------------------------------------------------------------------------------------------------------------------------------------------------------------|----------------------|
| Democratic Republic of the Congo | 293                  | 0                        | 5855                        | Demographic and Health Survey (DHS)         | 2007      | Macro International, Inc, Ministry of Planning (Congo, DR). Democratic Republic of the Congo Demographic and Health Survey 2007. Calverton, United States: Macro International, Inc.                                                                                                                                              | <a href="#">GHDx</a> |
| Democratic Republic of the Congo | 0                    | 383                      | 7462                        | Multiple Indicator Cluster Survey (MICS)    | 2010      | National Statistical Institute (Congo, DR), Ministry of Planning (Congo, DR), United Nations Children's Fund (UNICEF). Congo, DR Multiple Indicator Cluster Survey 2010. New York, United States: United Nations Children's Fund (UNICEF).                                                                                        | <a href="#">GHDx</a> |
| Democratic Republic of the Congo | 491                  | 1                        | 12205                       | Demographic and Health Survey (DHS)         | 2013-2014 | ICF International, Ministry of Planning and Monitoring Implementation of the Revolution of Modernity (Congo, DR), Ministry of Public Health (Congo, DR), National Institute of Statistics (Congo, DR). Democratic Republic of the Congo Demographic and Health Survey 2013-2014. Fairfax, United States: ICF International, 2014. | <a href="#">GHDx</a> |
| Djibouti                         | 0                    | 212                      | 846                         | Pan Arab Project for Family Health (PAPFAM) | 2002      | Department of Statistics and Demographic Studies (Djibouti), League of Arab States, Ministry of Health (Djibouti), Pan Arab Project for Family Health (PAPFAM). Djibouti Family Health Survey 2002.                                                                                                                               | <a href="#">GHDx</a> |
| Djibouti                         | 96                   | 113                      | 1605                        | Multiple Indicator Cluster Survey (MICS)    | 2006      | Ministry of Economy, Finance, and Planning in charge of Privatization (Djibouti), Ministry of Health (Djibouti), United Nations Children's Fund (UNICEF). Djibouti Multiple Indicator Cluster Survey 2006. New York, United States: United Nations Children's Fund (UNICEF).                                                      | <a href="#">GHDx</a> |
| Djibouti                         | 0                    | 198                      | 686                         | Family Health Survey                        | 2012      | Department of Statistics and Demographic Studies (Djibouti), League of Arab States, Ministry of Health (Djibouti), Pan Arab Project for Family Health (PAPFAM). Djibouti Family Health Survey 2012.                                                                                                                               | <a href="#">GHDx</a> |
| Egypt                            | 809                  | 0                        | 2186                        | Demographic and Health Survey (DHS)         | 2000      | Macro International, Inc, National Population Council (Egypt). Egypt Demographic and Health Survey 2000. Calverton, United States: Macro International, Inc.                                                                                                                                                                      | <a href="#">GHDx</a> |
| Egypt                            | 861                  | 0                        | 4268                        | DHS Interim Demographic and Health Survey   | 2003      | El-Zanaty and Associates, Macro International, Inc, Ministry of Health and Population (Egypt), National Population Council (Egypt). Egypt Interim Demographic and Health Survey 2003. Calverton, United States: Macro International, Inc.                                                                                         | <a href="#">GHDx</a> |
| Egypt                            | 1280                 | 0                        | 9873                        | Demographic and Health Survey (DHS)         | 2005      | El-Zanaty and Associates, Macro International, Inc, Ministry of Health and Population (Egypt), National Population Council (Egypt). Egypt Demographic and Health Survey 2005. Calverton, United States: Macro International, Inc.                                                                                                 | <a href="#">GHDx</a> |
| Egypt                            | 1208                 | 0                        | 7809                        | Demographic and Health Survey (DHS)         | 2008      | El-Zanaty and Associates, Macro International, Inc, Ministry of Health and Population (Egypt). Egypt Demographic and Health Survey 2008. Calverton, United States: Macro International, Inc, 2009.                                                                                                                                | <a href="#">GHDx</a> |

| Country           | GPS-located clusters | Areally-located clusters | Number of children included | Series                                   | Year(s)   | Citation                                                                                                                                                                                                                                                      | Link                 |
|-------------------|----------------------|--------------------------|-----------------------------|------------------------------------------|-----------|---------------------------------------------------------------------------------------------------------------------------------------------------------------------------------------------------------------------------------------------------------------|----------------------|
| Egypt             | 0                    | 234                      | 3937                        | Multiple Indicator Cluster Survey (MICS) | 2013-2014 | El-Zanaty and Associates, Ministry of Health and Population (Egypt), United Nations Children's Fund (UNICEF). Egypt IPHN Rural Districts Multiple Indicator Cluster Survey 2013-2014. New York, United States: United Nations Children's Fund (UNICEF), 2016. | <a href="#">GHDx</a> |
| Egypt             | 1714                 | 0                        | 12048                       | Demographic and Health Survey (DHS)      | 2014      | El-Zanaty and Associates, ICF International, Ministry of Health and Population (Egypt). Egypt Demographic and Health Survey 2014. Fairfax, United States: ICF International, 2015.                                                                            | <a href="#">GHDx</a> |
| Equatorial Guinea | 0                    | 147                      | 520                         | Multiple Indicator Cluster Survey (MICS) | 2000      | Ministry of Planning, Economic Development and Public Investment (Equatorial Guinea), United Nations Children's Fund (UNICEF). Equatorial Guinea Multiple Indicator Cluster Survey 2000. New York, United States: United Nations Children's Fund (UNICEF).    | <a href="#">GHDx</a> |
| Eritrea           | 0                    | 368                      | 3222                        | Demographic and Health Survey (DHS)      | 2002      | Macro International, Inc, National Statistics and Evaluation Office (Eritrea). Eritrea Demographic and Health Survey 2002. Calverton, United States: Macro International, Inc.                                                                                | <a href="#">GHDx</a> |
| Ethiopia          | 500                  | 0                        | 1807                        | Demographic and Health Survey (DHS)      | 2000      | Central Statistical Agency (Ethiopia), ORC Macro. Ethiopia Demographic and Health Survey 2000. Calverton, United States: ORC Macro, 2001.                                                                                                                     | <a href="#">GHDx</a> |
| Ethiopia          | 527                  | 0                        | 6839                        | Demographic and Health Survey (DHS)      | 2005      | Macro International, Inc, Population and Housing Census Commissions Office (PHCCO). Ethiopia Demographic and Health Survey 2005. Calverton, United States: Macro International, Inc.                                                                          | <a href="#">GHDx</a> |
| Ethiopia          | 571                  | 0                        | 8152                        | Demographic and Health Survey (DHS)      | 2010-2011 | Central Statistical Agency (Ethiopia), ICF Macro, Ministry of Health (Ethiopia). Ethiopia Demographic and Health Survey 2010-2011. Calverton, United States: ICF Macro.                                                                                       | <a href="#">GHDx</a> |
| Ethiopia          | 611                  | 0                        | 3757                        | Demographic and Health Survey (DHS)      | 2016      | Central Statistical Agency (Ethiopia), ICF International. Ethiopia Demographic and Health Survey 2016. Fairfax, United States: ICF International, 2017.                                                                                                       | <a href="#">GHDx</a> |
| Gabon             | 0                    | 226                      | 883                         | Demographic and Health Survey (DHS)      | 2000-2001 | General Directorate of Statistics and Economic Studies (Gabon), Macro International, Inc. Gabon Demographic and Health Survey 2000-2001. Calverton, United States: Macro International, Inc.                                                                  | <a href="#">GHDx</a> |
| Gabon             | 329                  | 0                        | 4293                        | Demographic and Health Survey (DHS)      | 2012      | General Directorate of Statistics (Gabon), ICF International, Ministry of Economy, Employment and Sustainable Development (Gabon), Ministry of Health (Gabon). Gabon Demographic and Health Survey 2012. Fairfax, United States: ICF International, 2013.     | <a href="#">GHDx</a> |
| Ghana             | 407                  | 0                        | 2717                        | Demographic and Health Survey (DHS)      | 2003      | Ghana Statistical Service, Macro International, Inc. Ghana Demographic and Health Survey 2003. Calverton, United States: Macro International, Inc.                                                                                                            | <a href="#">GHDx</a> |
| Ghana             | 0                    | 282                      | 1806                        | Multiple Indicator Cluster Survey (MICS) | 2006      | Ministry of Health (MOH) (Ghana), Ghana Statistical Service and United Nations Children's Fund (UNICEF). Ghana Multiple Indicator Cluster Survey 2006. New York, United States: United Nations Children's Fund (UNICEF).                                      | <a href="#">GHDx</a> |

| Country       | GPS-located clusters | Areally-located clusters | Number of children included | Series                                    | Year(s)   | Citation                                                                                                                                                                                                                                                                                                                                                                     | Link                 |
|---------------|----------------------|--------------------------|-----------------------------|-------------------------------------------|-----------|------------------------------------------------------------------------------------------------------------------------------------------------------------------------------------------------------------------------------------------------------------------------------------------------------------------------------------------------------------------------------|----------------------|
| Ghana         | 0                    | 631                      | 6361                        | Multiple Indicator Cluster Survey (MICS)  | 2007-2008 | Ghana Statistical Service, Ministry of Health (Ghana), United Nations Children's Fund (UNICEF). Ghana District Multiple Indicator Cluster Survey 2007-2008.                                                                                                                                                                                                                  | <a href="#">GHDx</a> |
| Ghana         | 400                  | 0                        | 2087                        | Demographic and Health Survey (DHS)       | 2008      | Ghana Statistical Service, Macro International, Inc, Ministry of Health (Ghana). Ghana Demographic and Health Survey 2008. Calverton, United States: Macro International, Inc.                                                                                                                                                                                               | <a href="#">GHDx</a> |
| Ghana         | 0                    | 293                      | 1686                        | Living Standards Measurement Study (LSMS) | 2009-2010 | Economic Growth Center, Yale University, Institute of Statistical, Social and Economic Research, University of Ghana. Ghana Socioeconomic Panel Survey 2009-2010. Washington DC, United States: World Bank.                                                                                                                                                                  | <a href="#">GHDx</a> |
| Ghana         | 96                   | 0                        | 339                         | Multiple Indicator Cluster Survey (MICS)  | 2010-2011 | Institute of Statistical, Social and Economic Research, University of Ghana, United Nations Children's Fund (UNICEF). Ghana - Accra Multiple Indicator Cluster Survey 2010-2011. New York, United States: United Nations Children's Fund (UNICEF), 2014.                                                                                                                     | <a href="#">GHDx</a> |
| Ghana         | 738                  | 0                        | 5398                        | Multiple Indicator Cluster Survey (MICS)  | 2011      | Centers for Disease Control and Prevention (CDC), Ghana Statistical Service, Government of Japan, Ministry of Health (Ghana), Navrongo Health Research Centre, USAID, United Nations Children's Fund (UNICEF), United Nations Population Fund (UNFPA). Ghana Multiple Indicator Cluster Survey 2011. New York, United States: United Nations Children's Fund (UNICEF), 2013. | <a href="#">GHDx</a> |
| Ghana         | 422                  | 0                        | 4307                        | Demographic and Health Survey (DHS)       | 2014      | Ghana Health Service, Ghana Statistical Service, ICF International. Ghana Demographic and Health Survey 2014. Fairfax, United States: ICF International, 2015.                                                                                                                                                                                                               | <a href="#">GHDx</a> |
| Guinea        | 291                  | 0                        | 4132                        | Demographic and Health Survey (DHS)       | 2005      | Macro International, Inc, National Statistics Directorate (Guinea). Guinea Demographic and Health Survey 2005. Calverton, United States: Macro International, Inc.                                                                                                                                                                                                           | <a href="#">GHDx</a> |
| Guinea        | 300                  | 0                        | 4975                        | Demographic and Health Survey (DHS)       | 2012      | ICF Macro, Ministry of Health and Public Hygiene (Guinea), National Institute of Statistics (Guinea). Guinea Demographic and Health Survey 2012. Calverton, United States: ICF Macro, 2014.                                                                                                                                                                                  | <a href="#">GHDx</a> |
| Guinea-Bissau | 0                    | 17                       | 1116                        | Multiple Indicator Cluster Survey (MICS)  | 2000      | Secretary State of Planning, National Institute of Statistics and Census (INEC), United Nations Children's Fund (UNICEF). Guinea-Bissau Multiple Indicator Cluster Survey 2000. New York, United States: United Nations Children's Fund (UNICEF).                                                                                                                            | <a href="#">GHDx</a> |
| Guinea-Bissau | 0                    | 321                      | 3871                        | Multiple Indicator Cluster Survey (MICS)  | 2006      | United Nations Children's Fund (UNICEF), Government of Guinea-Bissau. Guinea-Bissau Multiple Indicator Cluster Survey 2006. New York, United States: United Nations Children's Fund (UNICEF).                                                                                                                                                                                | <a href="#">GHDx</a> |
| Guinea-Bissau | 0                    | 341                      | 2915                        | Multiple Indicator Cluster Survey (MICS)  | 2014      | National Statistics Institute (Guinea-Bissau), United Nations Children's Fund (UNICEF). Guinea-Bissau Multiple Cluster Indicator Survey 2014. New York, United States: United Nations Children's Fund (UNICEF), 2016.                                                                                                                                                        | <a href="#">GHDx</a> |

| Country | GPS-located clusters | Areally-located clusters | Number of children included | Series                                   | Year(s)   | Citation                                                                                                                                                                                                                                                                                                                                                                                             | Link                 |
|---------|----------------------|--------------------------|-----------------------------|------------------------------------------|-----------|------------------------------------------------------------------------------------------------------------------------------------------------------------------------------------------------------------------------------------------------------------------------------------------------------------------------------------------------------------------------------------------------------|----------------------|
| Kenya   | 678                  | 0                        | 1530                        | Multiple Indicator Cluster Survey (MICS) | 2000      | Central Bureau of Statistics (Kenya), United Nations Children's Fund (UNICEF). Kenya Multiple Indicator Cluster Survey 2000. New York, United States: United Nations Children's Fund (UNICEF).                                                                                                                                                                                                       | <a href="#">GHDx</a> |
| Kenya   | 398                  | 0                        | 4186                        | Demographic and Health Survey (DHS)      | 2003      | Centers for Disease Control and Prevention (CDC), Central Bureau of Statistics (Kenya), Macro International, Inc, Ministry of Health (Kenya), National Council for Population and Development (Kenya). Kenya Demographic and Health Survey 2003. Calverton, United States: Macro International, Inc.                                                                                                 | <a href="#">GHDx</a> |
| Kenya   | 1294                 | 0                        | 6086                        | Kenya Integrated Household Budget Survey | 2005-2006 | Central Bureau of Statistics (Kenya), UK Department for International Development (DFID), United States Agency for International Development (USAID), European Union (EU), Danish International Development Agency (DANIDA), World Bank (WB), United Nations Development Programme (UNDP). Kenya Integrated Household Budget Survey 2005-2006. Nairobi, Kenya: Central Bureau of Statistics (Kenya). | <a href="#">GHDx</a> |
| Kenya   | 78                   | 0                        | 706                         | Multiple Indicator Cluster Survey (MICS) | 2007      | Kenya National Bureau of Statistics, United Nations Children's Fund (UNICEF). Kenya - North Eastern Province Multiple Indicator Cluster Survey 2007. Nairobi, Kenya: Kenya National Bureau of Statistics.                                                                                                                                                                                            | <a href="#">GHDx</a> |
| Kenya   | 650                  | 0                        | 10589                       | Multiple Indicator Cluster Survey (MICS) | 2008      | Kenya National Bureau of Statistics, United Nations Children's Fund (UNICEF). Kenya - Eastern Province Multiple Indicator Cluster Survey 2008. Nairobi, Kenya: Kenya National Bureau of Statistics.                                                                                                                                                                                                  | <a href="#">GHDx</a> |
| Kenya   | 396                  | 0                        | 4419                        | Demographic and Health Survey (DHS)      | 2008-2009 | ICF Macro, Kenya Medical Research Institute (KEMRI), Kenya National Bureau of Statistics, Ministry of Public Health and Sanitation (Kenya), National AIDS and STI Control Program (Kenya), National Aids Control Council (NACC), National Coordinating Agency for Population and Development (Kenya). Kenya Demographic and Health Survey 2008-2009. Calverton, United States: ICF Macro.            | <a href="#">GHDx</a> |
| Kenya   | 0                    | 45                       | 351                         | Multiple Indicator Cluster Survey (MICS) | 2009      | Kenya National Bureau of Statistics, United Nations Children's Fund (UNICEF). Kenya - Coast Multiple Indicator Cluster Survey 2009. New York, United States: United Nations Children's Fund (UNICEF), 2014.                                                                                                                                                                                          | <a href="#">GHDx</a> |
| Kenya   | 292                  | 0                        | 3757                        | Multiple Indicator Cluster Survey (MICS) | 2011      | Kenya National Bureau of Statistics, United Nations Children's Fund (UNICEF). Kenya - Nyanza Province Multiple Indicator Cluster Survey 2011. Nairobi, Kenya: Kenya National Bureau of Statistics.                                                                                                                                                                                                   | <a href="#">GHDx</a> |



| Country | GPS-located clusters | Areally-located clusters | Number of children included | Series                                   | Year(s)   | Citation                                                                                                                                                                                                                                                                                                                 | Link                 |
|---------|----------------------|--------------------------|-----------------------------|------------------------------------------|-----------|--------------------------------------------------------------------------------------------------------------------------------------------------------------------------------------------------------------------------------------------------------------------------------------------------------------------------|----------------------|
| Kenya   | 50                   | 0                        | 663                         | Multiple Indicator Cluster Survey (MICS) | 2013-2014 | Kenya National Bureau of Statistics, Population Studies and Research Institute, University of Nairobi (Kenya), United Nations Children's Fund (UNICEF). Kenya - Bungoma County Multiple Indicator Survey 2013-2014. New York, United States: United Nations Children's Fund (UNICEF), 2015.                              | <a href="#">GHDx</a> |
| Kenya   | 48                   | 0                        | 615                         | Multiple Indicator Cluster Survey (MICS) | 2013-2014 | Kenya National Bureau of Statistics, Population Studies and Research Institute, University of Nairobi (Kenya), United Nations Children's Fund (UNICEF). Kenya - Kakamega County Multiple Indicator Survey 2013-2014. New York, United States: United Nations Children's Fund (UNICEF), 2015.                             | <a href="#">GHDx</a> |
| Kenya   | 57                   | 0                        | 794                         | Multiple Indicator Cluster Survey (MICS) | 2013-2014 | Kenya National Bureau of Statistics, Population Studies and Research Institute, University of Nairobi (Kenya), United Nations Children's Fund (UNICEF). Kenya - Turkana County Multiple Indicator Survey 2013-2014. New York, United States: United Nations Children's Fund (UNICEF), 2015.                              | <a href="#">GHDx</a> |
| Kenya   | 1582                 | 0                        | 16025                       | Demographic and Health Survey (DHS)      | 2014      | ICF International, Kenya Medical Research Institute (KEMRI), Kenya National Bureau of Statistics, Ministry of Health (Kenya), National AIDS Control Council (Kenya), National Council for Population and Development (Kenya). Kenya Demographic and Health Survey 2014. Fairfax, United States: ICF International, 2015. | <a href="#">GHDx</a> |
| Lesotho | 377                  | 0                        | 2409                        | Demographic and Health Survey (DHS)      | 2004-2005 | Bureau of Statistics (Lesotho), Macro International, Inc, Ministry of Health and Social Welfare (Lesotho). Lesotho Demographic and Health Survey 2004-2005. Calverton, United States: Macro International, Inc.                                                                                                          | <a href="#">GHDx</a> |
| Lesotho | 394                  | 0                        | 2721                        | Demographic and Health Survey (DHS)      | 2009-2010 | ICF Macro, Ministry of Health and Social Welfare (Lesotho). Lesotho Demographic and Health Survey 2009-2010. Calverton, United States: ICF Macro.                                                                                                                                                                        | <a href="#">GHDx</a> |
| Lesotho | 395                  | 0                        | 2205                        | Demographic and Health Survey (DHS)      | 2014      | ICF International, Ministry of Health and Social Welfare (Lesotho). Lesotho Demographic and Health Survey 2014. Fairfax, United States: ICF International, 2016.                                                                                                                                                         | <a href="#">GHDx</a> |
| Liberia | 291                  | 0                        | 4007                        | Demographic and Health Survey (DHS)      | 2006-2007 | Liberia Institute for Statistics and Geo-information Services (LISGIS), Macro International, Inc. Liberia Demographic and Health Survey 2006-2007. Calverton, United States: Macro International, Inc.                                                                                                                   | <a href="#">GHDx</a> |
| Liberia | 322                  | 0                        | 5430                        | Demographic and Health Survey (DHS)      | 2013      | ICF International, Liberia Institute for Statistics and Geo-information Services (LISGIS), National AIDS and STI Control Program (NACP), Ministry of Health and Social Welfare (Liberia). Liberia Demographic and Health Survey 2013.                                                                                    | <a href="#">GHDx</a> |

| Country    | GPS-located clusters | Areally-located clusters | Number of children included | Series                                       | Year(s)   | Citation                                                                                                                                                                                                                   | Link                 |
|------------|----------------------|--------------------------|-----------------------------|----------------------------------------------|-----------|----------------------------------------------------------------------------------------------------------------------------------------------------------------------------------------------------------------------------|----------------------|
| Madagascar | 0                    | 270                      | 1670                        | Multiple Indicator Cluster Survey (MICS)     | 2000      | National Institute of Statistics (Madagascar), United Nations Children's Fund (UNICEF). Madagascar Multiple Indicator Cluster Survey 2000. New York, United States: United Nations Children's Fund (UNICEF).               | <a href="#">GHDx</a> |
| Madagascar | 0                    | 300                      | 3982                        | Demographic and Health Survey (DHS)          | 2003-2004 | Macro International, Inc, National Institute of Statistics (Madagascar). Madagascar Demographic and Health Survey 2003-2004. Calverton, United States: Macro International, Inc.                                           | <a href="#">GHDx</a> |
| Madagascar | 585                  | 0                        | 8992                        | Demographic and Health Survey (DHS)          | 2008-2009 | ICF Macro, National Institute of Statistics (Madagascar). Madagascar Demographic and Health Survey 2008-2009. Calverton, United States: ICF Macro, 2010.                                                                   | <a href="#">GHDx</a> |
| Madagascar | 127                  | 0                        | 2001                        | Multiple Indicator Cluster Survey (MICS)     | 2012      | National Institute of Statistics (Madagascar), United Nations Children's Fund (UNICEF). Madagascar - South Multiple Indicator Cluster Survey 2012. New York, United States: United Nations Children's Fund (UNICEF), 2015. | <a href="#">GHDx</a> |
| Malawi     | 549                  | 0                        | 2186                        | Demographic and Health Survey (DHS)          | 2000      | Macro International, Inc, National Statistical Office of Malawi. Malawi Demographic and Health Survey 2000. Calverton, United States: Macro International, Inc.                                                            | <a href="#">GHDx</a> |
| Malawi     | 520                  | 0                        | 7477                        | Demographic and Health Survey (DHS)          | 2004-2005 | Macro International, Inc, National Statistical Office of Malawi. Malawi Demographic and Health Survey 2004-2005. Calverton, United States: Macro International, Inc.                                                       | <a href="#">GHDx</a> |
| Malawi     | 0                    | 1040                     | 17586                       | Multiple Indicator Cluster Survey (MICS)     | 2006      | United Nations Children's Fund (UNICEF), National Statistics Office (Malawi). Malawi Multiple Indicator Cluster Survey 2006. New York, United States: United Nations Children's Fund (UNICEF).                             | <a href="#">GHDx</a> |
| Malawi     | 0                    | 273                      | 1329                        | Global Fund Household Health Coverage Survey | 2007-2008 | Ministry of Economic Planning and Development (Malawi), National Statistical Office of Malawi. Malawi Global Fund Household Health Coverage Survey 2007-2008.                                                              | <a href="#">GHDx</a> |
| Malawi     | 827                  | 0                        | 14087                       | Demographic and Health Survey (DHS)          | 2010      | ICF Macro, National Statistical Office of Malawi. Malawi Demographic and Health Survey 2010. Calverton, United States: ICF Macro.                                                                                          | <a href="#">GHDx</a> |
| Malawi     | 0                    | 1138                     | 7676                        | Multiple Indicator Cluster Survey (MICS)     | 2013-2014 | National Statistical Office of Malawi, United Nations Children's Fund (UNICEF). Malawi Multiple Indicator Cluster Survey 2013-2014. New York, United States: United Nations Children's Fund (UNICEF), 2015.                | <a href="#">GHDx</a> |
| Malawi     | 849                  | 0                        | 6403                        | Demographic and Health Survey (DHS)          | 2015-2016 | ICF International, Ministry of Health (Malawi), National Statistical Office of Malawi. Malawi Demographic and Health Survey 2015-2016. Fairfax, United States: ICF International, 2017.                                    | <a href="#">GHDx</a> |
| Mali       | 405                  | 0                        | 9430                        | Demographic and Health Survey (DHS)          | 2006      | Macro International, Inc, Ministry of Health (Mali), National Directorate of Statistics and Informatics (DNSI) (Mali). Mali Demographic and Health Survey 2006. Calverton, United States: Macro International, Inc.        | <a href="#">GHDx</a> |

| Country    | GPS-located clusters | Areally-located clusters | Number of children included | Series                                      | Year(s)   | Citation                                                                                                                                                                                                                                                                  | Link                 |
|------------|----------------------|--------------------------|-----------------------------|---------------------------------------------|-----------|---------------------------------------------------------------------------------------------------------------------------------------------------------------------------------------------------------------------------------------------------------------------------|----------------------|
| Mali       | 0                    | 419                      | 11910                       | Multiple Indicator Cluster Survey (MICS)    | 2009-2010 | Ministry of Health (Mali), National Institute of Statistics (INSTAT) (Mali), United Nations Children's Fund (UNICEF). Mali Multiple Indicator Cluster Survey 2009-2010. New York, United States: United Nations Children's Fund (UNICEF), 2017.                           | <a href="#">GHDx</a> |
| Mali       | 413                  | 0                        | 7309                        | Demographic and Health Survey (DHS)         | 2012-2013 | ICF International, INFO-STAT (Mali), Ministry of Health (Mali), National Institute of Statistics (INSTAT) (Mali), Planning and Statistics Unit, Ministry of Health (Mali). Mali Demographic and Health Survey 2012-2013. Fairfax, United States: ICF International, 2014. | <a href="#">GHDx</a> |
| Mali       | 0                    | 594                      | 5850                        | Multiple Indicator Cluster Survey (MICS)    | 2015      | Ministry of Health (Mali), Ministry of Planning (Mali), National Institute of Statistics (INSTAT) (Mali), United Nations Children's Fund (UNICEF). Mali Multiple Indicator Cluster Survey 2015. New York, United States: United Nations Children's Fund (UNICEF), 2017.   | <a href="#">GHDx</a> |
| Mauritania | 0                    | 248                      | 860                         | Demographic and Health Survey (DHS)         | 2000-2001 | Macro International, Inc, National Office of Statistics (Mauritania). Mauritania Demographic and Health Survey 2000-2001. Calverton, United States: Macro International, Inc.                                                                                             | <a href="#">GHDx</a> |
| Mauritania | 0                    | 457                      | 5051                        | Multiple Indicator Cluster Survey (MICS)    | 2007      | National Office of Statistics (Mauritania), United Nations Children's Fund (UNICEF). Mauritania Multiple Indicator Cluster Survey 2007. New York, United States: United Nations Children's Fund (UNICEF).                                                                 | <a href="#">GHDx</a> |
| Mauritania | 0                    | 513                      | 6393                        | Multiple Indicator Cluster Survey (MICS)    | 2011      | National Office of Statistics (Mauritania), United Nations Children's Fund (UNICEF). Mauritania Multiple Indicator Cluster Survey 2011. New York, United States: United Nations Children's Fund (UNICEF), 2015.                                                           | <a href="#">GHDx</a> |
| Morocco    | 480                  | 0                        | 4737                        | Demographic and Health Survey (DHS)         | 2003-2004 | League of Arab States, Macro International, Inc, Ministry of Health (Morocco). Morocco Demographic and Health Survey 2003-2004. Calverton, United States: Macro International, Inc.                                                                                       | <a href="#">GHDx</a> |
| Morocco    | 0                    | 603                      | 3025                        | Pan Arab Project for Family Health (PAPFAM) | 2010-2011 | Ministry of Health (Morocco), Pan Arab Project for Family Health (PAPFAM), United Nations Children's Fund (UNICEF), United Nations Population Fund (UNFPA), World Health Organization (WHO). Morocco National Survey on Population and Family Health 2010-2011.           | <a href="#">GHDx</a> |
| Mozambique | 0                    | 603                      | 6988                        | Demographic and Health Survey (DHS)         | 2003-2004 | Macro International, Inc, National Institute of Statistics (INE) (Mozambique). Mozambique Demographic and Health Survey 2003-2004. Calverton, United States: Macro International, Inc.                                                                                    | <a href="#">GHDx</a> |
| Mozambique | 0                    | 6158                     | 8134                        | Multiple Indicator Cluster Survey (MICS)    | 2008-2009 | United Nations Children's Fund (UNICEF), National Statistics Institute (Mozambique). Mozambique Multiple Indicator Cluster Survey 2008-2009. New York, United States: United Nations Children's Fund (UNICEF)                                                             | <a href="#">GHDx</a> |

| Country    | GPS-located clusters | Areally-located clusters | Number of children included | Series                                   | Year(s)   | Citation                                                                                                                                                                                                                                                                    | Link                 |
|------------|----------------------|--------------------------|-----------------------------|------------------------------------------|-----------|-----------------------------------------------------------------------------------------------------------------------------------------------------------------------------------------------------------------------------------------------------------------------------|----------------------|
| Mozambique | 609                  | 0                        | 7744                        | Demographic and Health Survey (DHS)      | 2011      | ICF Macro, Manhica Health Research Center (CISM), Ministry of Health (Mozambique), National Institute of Statistics (INE) (Mozambique). Mozambique Demographic and Health Survey 2011. Calverton, United States: ICF Macro, 2013.                                           | <a href="#">GHDx</a> |
| Namibia    | 236                  | 0                        | 787                         | Demographic and Health Survey (DHS)      | 2000      | Macro International, Inc, Ministry of Health and Social Services (Namibia), National Planning Commission (Namibia). Namibia Demographic and Health Survey 2000. Calverton, United States: Macro International, Inc.                                                         | <a href="#">GHDx</a> |
| Namibia    | 485                  | 0                        | 3545                        | Demographic and Health Survey (DHS)      | 2006-2007 | Macro International, Inc, Ministry of Health and Social Services (Namibia). Namibia Demographic and Health Survey 2006-2007. Calverton, United States: Macro International, Inc.                                                                                            | <a href="#">GHDx</a> |
| Namibia    | 533                  | 0                        | 3611                        | Demographic and Health Survey (DHS)      | 2013      | ICF International, Ministry of Health and Social Services (Namibia), Namibia Institute of Pathology, Namibia Statistics Agency. Namibia Demographic and Health Survey 2013. Fairfax, United States: ICF International, 2015.                                                | <a href="#">GHDx</a> |
| Niger      | 0                    | 197                      | 950                         | Multiple Indicator Cluster Survey (MICS) | 2000      | Government of Niger, Macro International, Inc, United Nations Children's Fund (UNICEF). Niger Multiple Indicator Cluster Survey 2000. New York, United States: United Nations Children's Fund (UNICEF).                                                                     | <a href="#">GHDx</a> |
| Niger      | 0                    | 342                      | 6263                        | Demographic and Health Survey (DHS)      | 2006      | Department of Statistics and National Accounts (Niger), Macro International, Inc. Niger Demographic and Health Survey 2006. Calverton, United States: Macro International, Inc.                                                                                             | <a href="#">GHDx</a> |
| Niger      | 0                    | 476                      | 8906                        | Demographic and Health Survey (DHS)      | 2012      | ICF International, Ministry of Public Health (Niger), National Institute of Statistics (Niger). Niger Demographic and Health Survey 2012. Fairfax, United States: ICF International, 2014.                                                                                  | <a href="#">GHDx</a> |
| Nigeria    | 357                  | 0                        | 3839                        | Demographic and Health Survey (DHS)      | 2003      | National Population Commission of Nigeria, ORC Macro, UK Department for International Development (DFID), United Nations Children's Fund (UNICEF), United Nations Population Fund (UNFPA). Nigeria Demographic and Health Survey 2003. Calverton, United States: ORC Macro. | <a href="#">GHDx</a> |
| Nigeria    | 0                    | 1100                     | 10516                       | Multiple Indicator Cluster Survey (MICS) | 2007      | United Nations Children's Fund (UNICEF), National Bureau of Statistics (Nigeria). Nigeria Multiple Indicator Cluster Survey 2007. New York, United States: United Nations Children's Fund (UNICEF).                                                                         | <a href="#">GHDx</a> |
| Nigeria    | 0                    | 31                       | 187                         | Nigeria General Household Survey         | 2007      | Central Bank of Nigeria, National Bureau of Statistics (Nigeria), Nigerian Communications Commission (NCC). Nigeria General Household Survey 2007. Abuja, Nigeria: National Bureau of Statistics (Nigeria).                                                                 | <a href="#">GHDx</a> |

| Country | GPS-located clusters | Areally-located clusters | Number of children included | Series                                    | Year(s)   | Citation                                                                                                                                                                                                                                                                                                                                                                                    | Link                 |
|---------|----------------------|--------------------------|-----------------------------|-------------------------------------------|-----------|---------------------------------------------------------------------------------------------------------------------------------------------------------------------------------------------------------------------------------------------------------------------------------------------------------------------------------------------------------------------------------------------|----------------------|
| Nigeria | 886                  | 0                        | 19358                       | Demographic and Health Survey (DHS)       | 2008      | Macro International, Inc, National Population Commission of Nigeria. Nigeria Demographic and Health Survey 2008. Calverton, United States: Macro International, Inc, 2009.                                                                                                                                                                                                                  | <a href="#">GHDx</a> |
| Nigeria | 212                  | 0                        | 380                         | Living Standards Measurement Study (LSMS) | 2010-2011 | National Bureau of Statistics (Nigeria). Nigeria General Household Survey 2010-2011. Abuja, Nigeria: National Bureau of Statistics (Nigeria).                                                                                                                                                                                                                                               | <a href="#">GHDx</a> |
| Nigeria | 0                    | 1474                     | 14780                       | Multiple Indicator Cluster Survey (MICS)  | 2011      | National Bureau of Statistics (Nigeria), United Nations Children's Fund (UNICEF). Nigeria Multiple Indicator Cluster Survey 2011. New York, United States: United Nations Children's Fund (UNICEF), 2013.                                                                                                                                                                                   | <a href="#">GHDx</a> |
| Nigeria | 0                    | 237                      | 252                         | Living Standards Measurement Study (LSMS) | 2012-2013 | National Bureau of Statistics (Nigeria). Nigeria General Household Survey 2012-2013. Washington DC, United States: World Bank.                                                                                                                                                                                                                                                              | <a href="#">GHDx</a> |
| Nigeria | 889                  | 0                        | 22027                       | Demographic and Health Survey (DHS)       | 2013      | ICF International, National Population Commission of Nigeria. Nigeria Demographic and Health Survey 2013. Fairfax, United States: ICF International, 2014.                                                                                                                                                                                                                                  | <a href="#">GHDx</a> |
| Nigeria | 0                    | 2154                     | 9523                        | Multiple Indicator Cluster Survey (MICS)  | 2016-2017 | National Agency for the Control of AIDS (Nigeria), National Bureau of Statistics (Nigeria), National Primary Health Care Development Agency (NPHCDA) (Nigeria), United Nations Children's Fund (UNICEF). Nigeria Multiple Indicator Cluster Survey with National Immunization Coverage Survey Supplement 2016-2017. New York, United States: United Nations Children's Fund (UNICEF), 2018. | <a href="#">GHDx</a> |
| Rwanda  | 0                    | 396                      | 1292                        | Demographic and Health Survey (DHS)       | 2000      | Macro International, Inc, National Office of Population (Rwanda). Rwanda Demographic and Health Survey 2000. Calverton, United States: Macro International, Inc.                                                                                                                                                                                                                            | <a href="#">GHDx</a> |
| Rwanda  | 0                    | 267                      | 613                         | Multiple Indicator Cluster Survey (MICS)  | 2000      | Department of Statistics (Rwanda), United Nations Children's Fund (UNICEF). Rwanda Multiple Indicator Cluster Survey 2000. New York, United States: United Nations Children's Fund (UNICEF).                                                                                                                                                                                                | <a href="#">GHDx</a> |
| Rwanda  | 456                  | 0                        | 5889                        | Demographic and Health Survey (DHS)       | 2005      | Macro International, Inc, National Institute of Statistics of Rwanda. Rwanda Demographic and Health Survey 2005. Calverton, United States: Macro International, Inc.                                                                                                                                                                                                                        | <a href="#">GHDx</a> |
| Rwanda  | 246                  | 0                        | 3979                        | DHS Interim Demographic and Health Survey | 2007-2008 | Macro International, Inc, Ministry of Health (Rwanda), National Institute of Statistics of Rwanda. Rwanda Interim Demographic and Health Survey 2007-2008. Calverton, United States: Macro International, Inc.                                                                                                                                                                              | <a href="#">GHDx</a> |
| Rwanda  | 492                  | 0                        | 6888                        | Demographic and Health Survey (DHS)       | 2010-2011 | ICF Macro, Ministry of Health (Rwanda), National Institute of Statistics of Rwanda. Rwanda Demographic and Health Survey 2010-2011. Calverton, United States: ICF Macro.                                                                                                                                                                                                                    | <a href="#">GHDx</a> |
| Rwanda  | 492                  | 0                        | 5928                        | Demographic and Health Survey (DHS)       | 2014-2015 | ICF International, Ministry of Health (Rwanda), National Institute of Statistics of Rwanda. Rwanda Demographic and Health Survey 2014-2015. Fairfax, United States: ICF International, 2016.                                                                                                                                                                                                | <a href="#">GHDx</a> |

| Country               | GPS-located clusters | Areally-located clusters | Number of children included | Series                                   | Year(s)   | Citation                                                                                                                                                                                                                                                                                                                                                                                                                                 | Link                 |
|-----------------------|----------------------|--------------------------|-----------------------------|------------------------------------------|-----------|------------------------------------------------------------------------------------------------------------------------------------------------------------------------------------------------------------------------------------------------------------------------------------------------------------------------------------------------------------------------------------------------------------------------------------------|----------------------|
| Sao Tome and Principe | 0                    | 106                      | 418                         | Multiple Indicator Cluster Survey (MICS) | 2000      | National Institute of Statistics (Sao Tome and Principe), United Nations Children's Fund (UNICEF). Sao Tome and Principe Multiple Indicator Cluster Survey 2000. New York, United States: United Nations Children's Fund (UNICEF).                                                                                                                                                                                                       | <a href="#">GHDx</a> |
| Sao Tome and Principe | 0                    | 104                      | 1437                        | Demographic and Health Survey (DHS)      | 2008-2009 | ICF Macro, Ministry of Health (Sao Tome and Principe), National Institute of Statistics (Sao Tome and Principe). Sao Tome and Principe Demographic and Health Survey 2008-2009. Calverton, United States: ICF Macro.                                                                                                                                                                                                                     | <a href="#">GHDx</a> |
| Sao Tome and Principe | 0                    | 131                      | 790                         | Multiple Indicator Cluster Survey (MICS) | 2014      | Global Fund to Fight Aids Tuberculosis and Malaria (GFATM), ICF International, National Center for Endemic Diseases (CNE) (Sao Tome and Principe), National Institute of Statistics (Sao Tome and Principe), United Nations Children's Fund (UNICEF), United Nations Development Programme (UNDP). Sao Tome and Principe Multiple Indicator Cluster Survey 2014. New York, United States: United Nations Children's Fund (UNICEF), 2016. | <a href="#">GHDx</a> |
| Senegal               | 366                  | 0                        | 7436                        | Demographic and Health Survey (DHS)      | 2005      | Ministry of Health and Prevention (Senegal), Research Center for Human Development (Senegal). Senegal Demographic and Health Survey 2005. Calverton, United States: Macro International, Inc.                                                                                                                                                                                                                                            | <a href="#">GHDx</a> |
| Senegal               | 385                  | 0                        | 8867                        | Demographic and Health Survey (DHS)      | 2010-2011 | Center for Research in Human Development (CRDH), Cheikh Anta Diop University, Hospital Aristide Le Dantec, ICF Macro, National Agency of Statistics and Demography (Senegal). Senegal Demographic and Health Survey 2010-2011. Calverton, United States: ICF Macro.                                                                                                                                                                      | <a href="#">GHDx</a> |
| Senegal               | 200                  | 0                        | 5157                        | Demographic and Health Survey (DHS)      | 2012-2013 | ICF International, Ministry of Health and Social Action (Senegal), National Agency of Statistics and Demography (Senegal). Senegal Continuous Demographic and Health Survey 2012-2013. Fairfax, United States: ICF International, 2014.                                                                                                                                                                                                  | <a href="#">GHDx</a> |
| Senegal               | 0                    | 199                      | 5238                        | Demographic and Health Survey (DHS)      | 2014      | Cheikh Anta Diop University, ICF International, National Agency of Statistics and Demography (Senegal). Senegal Continuous Demographic and Health Survey 2014. Fairfax, United States: ICF International, 2015.                                                                                                                                                                                                                          | <a href="#">GHDx</a> |
| Senegal               | 214                  | 0                        | 5202                        | Demographic and Health Survey (DHS)      | 2015      | Cheikh Anta Diop University, ICF International, National Agency of Statistics and Demography (Senegal). Senegal Continuous Demographic and Health Survey 2015. Fairfax, United States: ICF International, 2016.                                                                                                                                                                                                                          | <a href="#">GHDx</a> |
| Senegal               | 214                  | 0                        | 5099                        | Demographic and Health Survey (DHS)      | 2016      | ICF International, Ministry of Health and Social Action (Senegal), National Agency of Statistics and Demography (Senegal). Senegal Continuous Demographic and Health Survey 2016. Fairfax, United States: ICF International, 2017.                                                                                                                                                                                                       | <a href="#">GHDx</a> |

| Country      | GPS-located clusters | Areally-located clusters | Number of children included | Series                                   | Year(s) | Citation                                                                                                                                                                                                                                                                                                                    | Link                 |
|--------------|----------------------|--------------------------|-----------------------------|------------------------------------------|---------|-----------------------------------------------------------------------------------------------------------------------------------------------------------------------------------------------------------------------------------------------------------------------------------------------------------------------------|----------------------|
| Sierra Leone | 0                    | 180                      | 533                         | Multiple Indicator Cluster Survey (MICS) | 2000    | Central Statistics Office (Sierra Leone), United Nations Children's Fund (UNICEF). Sierra Leone Multiple Indicator Cluster Survey 2000. New York, United States: United Nations Children's Fund (UNICEF).                                                                                                                   | <a href="#">GHDx</a> |
| Sierra Leone | 0                    | 330                      | 3652                        | Multiple Indicator Cluster Survey (MICS) | 2005    | United Nations Children's Fund (UNICEF), Statistics Sierra Leone. Sierra Leone Multiple Indicator Cluster Survey 2005. New York, United States: United Nations Children's Fund (UNICEF).                                                                                                                                    | <a href="#">GHDx</a> |
| Sierra Leone | 349                  | 0                        | 3621                        | Demographic and Health Survey (DHS)      | 2008    | Macro International, Inc, Statistics Sierra Leone. Sierra Leone Demographic and Health Survey 2008. Calverton, United States: Macro International, Inc.                                                                                                                                                                     | <a href="#">GHDx</a> |
| Sierra Leone | 0                    | 480                      | 6232                        | Multiple Indicator Cluster Survey (MICS) | 2010    | Statistics Sierra Leone, United Nations Children's Fund (UNICEF). Sierra Leone Multiple Indicator Cluster Survey 2010. New York, United States: United Nations Children's Fund (UNICEF).                                                                                                                                    | <a href="#">GHDx</a> |
| Sierra Leone | 435                  | 0                        | 8038                        | Demographic and Health Survey (DHS)      | 2013    | ICF International, Ministry of Health and Sanitation (Sierra Leone), Statistics Sierra Leone. Sierra Leone Demographic and Health Survey 2013. Fairfax, United States: ICF International, 2014.                                                                                                                             | <a href="#">GHDx</a> |
| Somalia      | 0                    | 248                      | 3057                        | Multiple Indicator Cluster Survey (MICS) | 2006    | Pan Arab Project for Family Health (PAPFAM), United Nations Children's Fund (UNICEF). Somalia Multiple Indicator Cluster Survey 2006. New York, United States: United Nations Children's Fund (UNICEF).                                                                                                                     | <a href="#">GHDx</a> |
| Somalia      | 259                  | 16                       | 2808                        | Multiple Indicator Cluster Survey (MICS) | 2011    | Ministry of National Planning and Development (Somaliland), United Nations Children's Fund (UNICEF). Somalia - Somaliland Multiple Indicator Cluster Survey 2011. New York, United States: United Nations Children's Fund (UNICEF), 2015.                                                                                   | <a href="#">GHDx</a> |
| Somalia      | 276                  | 0                        | 3266                        | Multiple Indicator Cluster Survey (MICS) | 2011    | Puntland Ministry of Planning and International Cooperation (Somalia), United Nations Children's Fund (UNICEF). Somalia - Northeast Zone Multiple Indicator Cluster Survey 2011. New York, United States: United Nations Children's Fund (UNICEF), 2015.                                                                    | <a href="#">GHDx</a> |
| South Sudan  | 0                    | 358                      | 1166                        | Multiple Indicator Cluster Survey (MICS) | 2010    | Central Bureau of Statistics (Sudan), Federal Ministry of Health (Sudan), Government of Sudan, Ministry of Health (South Sudan), Southern Sudan Centre for Census, Statistics and Evaluation. Sudan - South Multiple Indicator Cluster Survey 2010. New York, United States: United Nations Children's Fund (UNICEF), 2015. | <a href="#">GHDx</a> |
| Sudan        | 0                    | 678                      | 2988                        | Multiple Indicator Cluster Survey (MICS) | 2000    | Central Bureau of Statistics (Sudan), Federal Ministry of Health (Sudan), United Nations Children's Fund (UNICEF). Sudan Multiple Indicator Cluster Survey 2000. New York, United States: United Nations Children's Fund (UNICEF).                                                                                          | <a href="#">GHDx</a> |

| Country   | GPS-located clusters | Areally-located clusters | Number of children included | Series                                                                            | Year(s)   | Citation                                                                                                                                                                                                                                                                                                                      | Link                 |
|-----------|----------------------|--------------------------|-----------------------------|-----------------------------------------------------------------------------------|-----------|-------------------------------------------------------------------------------------------------------------------------------------------------------------------------------------------------------------------------------------------------------------------------------------------------------------------------------|----------------------|
| Sudan     | 0                    | 578                      | 2295                        | Multiple Indicator Cluster Survey (MICS)                                          | 2010      | Central Bureau of Statistics (Sudan), Ministry of Health (South Sudan). Sudan - North Multiple Indicator Cluster Survey 2010. New York, United States: United Nations Children's Fund (UNICEF), 2015.                                                                                                                         | <a href="#">GHDx</a> |
| Sudan     | 0                    | 715                      | 4816                        | Multiple Indicator Cluster Survey (MICS)                                          | 2014      | Central Bureau of Statistics (Sudan), Federal Ministry of Health (Sudan), United Nations Children's Fund (UNICEF). Sudan Multiple Indicator Cluster Survey 2014. New York, United States: United Nations Children's Fund (UNICEF), 2016.                                                                                      | <a href="#">GHDx</a> |
| Swaziland | 0                    | 251                      | 697                         | Multiple Indicator Cluster Survey (MICS)                                          | 2000      | Central Statistical Office (Swaziland), United Nations Children's Fund (UNICEF). Swaziland Multiple Indicator Cluster Survey 2000. New York, United States: United Nations Children's Fund (UNICEF).                                                                                                                          | <a href="#">GHDx</a> |
| Swaziland | 266                  | 0                        | 1934                        | Demographic and Health Survey (DHS)                                               | 2006-2007 | Central Statistical Office (Swaziland), Macro International, Inc. Swaziland Demographic and Health Survey 2006-2007. Calverton, United States: Macro International, Inc.                                                                                                                                                      | <a href="#">GHDx</a> |
| Swaziland | 0                    | 345                      | 2046                        | Multiple Indicator Cluster Survey (MICS)                                          | 2010      | Central Statistical Office (Swaziland), United Nations Children's Fund (UNICEF). Swaziland Multiple Indicator Cluster Survey 2010. New York, United States: United Nations Children's Fund (UNICEF).                                                                                                                          | <a href="#">GHDx</a> |
| Swaziland | 0                    | 317                      | 1087                        | Multiple Indicator Cluster Survey (MICS)                                          | 2014      | Central Statistical Office (Swaziland), United Nations Children's Fund (UNICEF), United Nations Educational, Scientific and Cultural Organization (UNESCO), United Nations Population Fund (UNFPA). Swaziland Multiple Indicator Cluster Survey 2014. New York, United States: United Nations Children's Fund (UNICEF), 2016. | <a href="#">GHDx</a> |
| Tanzania  | 0                    | 475                      | 6127                        | Demographic and Health Survey (DHS)                                               | 2004-2005 | Macro International, Inc, National Bureau of Statistics (Tanzania). Tanzania Demographic and Health Survey 2004-2005. Calverton, United States: Macro International, Inc.                                                                                                                                                     | <a href="#">GHDx</a> |
| Tanzania  | 0                    | 837                      | 6605                        | Core Welfare Indicators Questionnaire Survey (CWIQ)                               | 2006-2007 | Economic Development Initiatives (EDI), World Bank (WB). Tanzania Core Welfare Indicators Questionnaire Survey 2006-2007. Bukoba, Tanzania: Economic Development Initiatives (EDI).                                                                                                                                           | <a href="#">GHDx</a> |
| Tanzania  | 0                    | 399                      | 1927                        | Living Standards Measurement Study - Integrated Surveys on Agriculture (LSMS-ISA) | 2008-2009 | National Bureau of Statistics (Tanzania). Tanzania Living Standards Measurement Study - Integrated Survey on Agriculture 2008-2009. Dar es Salaam, Tanzania: National Bureau of Statistics (Tanzania).                                                                                                                        | <a href="#">GHDx</a> |
| Tanzania  | 458                  | 0                        | 5719                        | Demographic and Health Survey (DHS)                                               | 2009-2010 | ICF Macro, National Bureau of Statistics (Tanzania). Tanzania Demographic and Health Survey 2009-2010. Calverton, United States: ICF Macro.                                                                                                                                                                                   | <a href="#">GHDx</a> |



| Country    | GPS-located clusters | Areally-located clusters | Number of children included | Series                                   | Year(s)   | Citation                                                                                                                                                                                                                                                                                                                                              | Link                 |
|------------|----------------------|--------------------------|-----------------------------|------------------------------------------|-----------|-------------------------------------------------------------------------------------------------------------------------------------------------------------------------------------------------------------------------------------------------------------------------------------------------------------------------------------------------------|----------------------|
| Tanzania   | 604                  | 0                        | 4012                        | Demographic and Health Survey (DHS)      | 2015-2016 | ICF International, Ministry of Health (Zanzibar), Ministry of Health, Community Development, Gender, Elderly and Children (MoHCDEC) (Tanzania), National Bureau of Statistics (Tanzania), Office of Chief Government Statistician (OCGS-Zanzibar). Tanzania Demographic and Health Survey 2015-2016. Fairfax, United States: ICF International, 2016. | <a href="#">GHDx</a> |
| The Gambia | 0                    | 215                      | 825                         | Multiple Indicator Cluster Survey (MICS) | 2000      | Central Statistics Department (Gambia), United Nations Children's Fund (UNICEF). Gambia Multiple Indicator Cluster Survey 2000. New York, United States: United Nations Children's Fund (UNICEF).                                                                                                                                                     | <a href="#">GHDx</a> |
| The Gambia | 0                    | 329                      | 4630                        | Multiple Indicator Cluster Survey (MICS) | 2005-2006 | Gambia Bureau of Statistics (GBOS), United Nations Children's Fund (UNICEF). Gambia Multiple Indicator Cluster Survey 2005-2006. New York, United States: United Nations Children's Fund (UNICEF).                                                                                                                                                    | <a href="#">GHDx</a> |
| The Gambia | 0                    | 281                      | 5791                        | Demographic and Health Survey (DHS)      | 2013      | Gambia Bureau of Statistics (GBOS), ICF International, Ministry of Health and Social Welfare (Gambia). Gambia Demographic and Health Survey 2013. Fairfax, United States: ICF International, 2015.                                                                                                                                                    | <a href="#">GHDx</a> |
| Togo       | 0                    | 300                      | 2606                        | Multiple Indicator Cluster Survey (MICS) | 2006      | Directorate General of Statistics and National Accounting (Togo), United Nations Children's Fund (UNICEF). Togo Multiple Indicator Cluster Survey 2006. New York, United States: United Nations Children's Fund (UNICEF).                                                                                                                             | <a href="#">GHDx</a> |
| Togo       | 0                    | 446                      | 3346                        | Multiple Indicator Cluster Survey (MICS) | 2010      | Directorate General of Statistics and National Accounting (Togo), United Nations Children's Fund (UNICEF). Togo Multiple Indicator Cluster Survey 2010. New York, United States: United Nations Children's Fund (UNICEF).                                                                                                                             | <a href="#">GHDx</a> |
| Togo       | 330                  | 0                        | 5176                        | Demographic and Health Survey (DHS)      | 2013-2014 | Directorate General of Statistics and National Accounts (Togo), ICF International, Ministry of Health (Togo). Togo Demographic and Health Survey 2013-2014. Fairfax, United States: ICF International, 2015.                                                                                                                                          | <a href="#">GHDx</a> |
| Tunisia    | 0                    | 466                      | 2262                        | Multiple Indicator Cluster Survey (MICS) | 2011-2012 | Ministry of Regional Development and Planning (Tunisia), National Institute of Statistics (Tunisia), United Nations Children's Fund (UNICEF). Tunisia Multiple Indicator Cluster Survey 2011-2012. New York, United States: United Nations Children's Fund (UNICEF), 2014.                                                                            | <a href="#">GHDx</a> |
| Uganda     | 259                  | 26                       | 1389                        | Demographic and Health Survey (DHS)      | 2000-2001 | Macro International, Inc, Uganda Bureau of Statistics. Uganda Demographic and Health Survey 2000-2001. Calverton, United States: Macro International, Inc.                                                                                                                                                                                            | <a href="#">GHDx</a> |
| Uganda     | 336                  | 0                        | 5442                        | Demographic and Health Survey (DHS)      | 2006      | Macro International, Inc, Uganda Bureau of Statistics. Uganda Demographic and Health Survey 2006. Calverton, United States: Macro International, Inc.                                                                                                                                                                                                 | <a href="#">GHDx</a> |
| Uganda     | 400                  | 0                        | 5670                        | Demographic and Health Survey (DHS)      | 2011      | ICF Macro, Uganda Bureau of Statistics. Uganda Demographic and Health Survey 2011. Calverton, United States: ICF Macro.                                                                                                                                                                                                                               | <a href="#">GHDx</a> |

| Country  | GPS-located clusters | Areally-located clusters | Number of children included | Series                                       | Year(s)   | Citation                                                                                                                                                                                                                                                                              | Link                 |
|----------|----------------------|--------------------------|-----------------------------|----------------------------------------------|-----------|---------------------------------------------------------------------------------------------------------------------------------------------------------------------------------------------------------------------------------------------------------------------------------------|----------------------|
| Zambia   | 0                    | 318                      | 2446                        | Demographic and Health Survey (DHS)          | 2001-2002 | Central Board of Health (Zambia), Central Statistical Office (Zambia), Macro International, Inc. Zambia Demographic and Health Survey 2001-2002. Calverton, United States: Macro International, Inc.                                                                                  | <a href="#">GHDx</a> |
| Zambia   | 0                    | 520                      | 4678                        | Zambia Living Conditions Monitoring Survey   | 2002-2003 | Central Statistical Office (Zambia). Zambia Living Conditions Monitoring Survey 2002-2003. Lusaka, Zambia: Central Statistical Office (Zambia).                                                                                                                                       | <a href="#">GHDx</a> |
| Zambia   | 319                  | 0                        | 4576                        | Demographic and Health Survey (DHS)          | 2007      | Central Statistical Office (Zambia), Macro International, Inc. Zambia Demographic and Health Survey 2007. Calverton, United States: Macro International, Inc.                                                                                                                         | <a href="#">GHDx</a> |
| Zambia   | 0                    | 186                      | 1817                        | Global Fund Household Health Coverage Survey | 2008      | Central Statistical Office (Zambia). Zambia Global Fund Household Health Coverage Survey 2008. Lusaka, Zambia: Central Statistical Office (Zambia).                                                                                                                                   | <a href="#">GHDx</a> |
| Zambia   | 719                  | 0                        | 9882                        | Demographic and Health Survey (DHS)          | 2013-2014 | Central Statistical Office (Zambia), ICF International, Ministry of Health (Zambia), Tropical Diseases Research Centre, University Teaching Hospital (Zambia), University of Zambia. Zambia Demographic and Health Survey 2013-2014. Fairfax, United States: ICF International, 2015. | <a href="#">GHDx</a> |
| Zimbabwe | 396                  | 0                        | 3743                        | Demographic and Health Survey (DHS)          | 2005-2006 | Central Statistical Office (Zimbabwe), Macro International, Inc. Zimbabwe Demographic and Health Survey 2005-2006. Calverton, United States: Macro International, Inc.                                                                                                                | <a href="#">GHDx</a> |
| Zimbabwe | 0                    | 500                      | 5663                        | Multiple Indicator Cluster Survey (MICS)     | 2009      | Central Statistical Office (Zimbabwe). Zimbabwe Multiple Indicator Monitoring Survey 2009. New York, United States: United Nations Children's Fund (UNICEF).                                                                                                                          | <a href="#">GHDx</a> |
| Zimbabwe | 392                  | 0                        | 3131                        | Demographic and Health Survey (DHS)          | 2010-2011 | ICF Macro, Zimbabwe National Statistics Agency. Zimbabwe Demographic and Health Survey 2010-2011. Calverton, United States: ICF Macro, 2012.                                                                                                                                          | <a href="#">GHDx</a> |
| Zimbabwe | 0                    | 682                      | 7805                        | Multiple Indicator Cluster Survey (MICS)     | 2014      | United Nations Children's Fund (UNICEF), Zimbabwe National Statistics Agency. Zimbabwe Multiple Indicator Cluster Survey 2014. New York, United States: United Nations Children's Fund (UNICEF), 2015.                                                                                | <a href="#">GHDx</a> |
| Zimbabwe | 398                  | 0                        | 2311                        | Demographic and Health Survey (DHS)          | 2015      | ICF International, National Microbiology Reference Laboratory, Harare Central Hospital (NMRL) (Zimbabwe), Zimbabwe National Statistics Agency. Zimbabwe Demographic and Health Survey 2015. Fairfax, United States: ICF International, 2016.                                          | <a href="#">GHDx</a> |

187  
188  
189  
190

191 **Supplementary Table 2: Data excluded from both the geostatistical model and GBD estimates**

192

| Country | Series                                              | Year(s)   | Citation                                                                                                                                                                                                                   | Rationale for exclusion                                                                                                                                                                                                                        |
|---------|-----------------------------------------------------|-----------|----------------------------------------------------------------------------------------------------------------------------------------------------------------------------------------------------------------------------|------------------------------------------------------------------------------------------------------------------------------------------------------------------------------------------------------------------------------------------------|
| Angola  | Core Welfare Indicators Questionnaire Survey (CWIQ) | 2011      | Ministry of Planning and Territorial Development (Angola), National Institute of Statistics (Angola). Angola Core Welfare Indicators Questionnaire Survey 2011. Luanda, Angola: National Institute of Statistics (Angola). | Estimates considered implausible. Survey estimates are systematically high compared to admin estimates and estimates from other established survey series (2015-2016 DHS and the 2008-2009 Angola Integrated Inquiry into People's Well-Being) |
| Congo   | Demographic and Health Surveys (DHS)                | 2005      | Macro International, Inc, National Center for Statistics and Economic Studies (Congo, Rep.). Congo Demographic and Health Survey 2005. Calverton, United States: Macro International, Inc.                                 | Estimates considered implausible. Survey estimates do not follow a reasonable age structure. Older children have significantly higher coverage than reported in either administrative data or other survey series.                             |
| Ghana   | Living Standards Measurement Survey (LSMS)          | 2012-2013 | Ghana Statistical Service, World Bank. Ghana Living Standards Measurement Survey 2012-2013. Accra, Ghana: Ghana Statistical Service                                                                                        | Estimates considered implausible. Survey estimates are systematically lower for DPT3 coverage than reported in other survey series (2011 MICS, 2008 DHS, 2014 DHS).                                                                            |
| Nigeria | Core Welfare Indicators Questionnaire Survey (CWIQ) | 2006      | National Bureau of Statistics (Nigeria). Nigeria Core Welfare Indicators Questionnaire Survey 2006. Abuja, Nigeria: National Bureau of Statistics (Nigeria).                                                               | Survey estimates are systematically high compared to admin estimates and estimates from other established survey series(2008 DHS, 2007 MICS)                                                                                                   |
| Nigeria | Living Standards Measurement Survey (LSMS)          | 2008-2010 | National Bureau of Statistics (Nigeria). Nigeria Living Standards Survey 2008-2010. Abuja, Nigeria: National Bureau of Statistics (Nigeria).                                                                               | Survey estimates are systematically high compared to admin estimates and estimates from other established survey series (2008 DHS, 2007 MICS)                                                                                                  |
| Uganda  | National Service Delivery Survey                    | 2004      | Ministry of Public Service (Uganda), Uganda Bureau of Statistics. Uganda National Service Delivery Survey 2004. OpenMicroData.                                                                                             | Estimates considered implausible. Survey estimates are inconsistent with both admin estimates and estimates from other established survey series (2006 DHS)                                                                                    |
| Uganda  | National Service Delivery Survey                    | 2008      | Ministry of Public Service (Uganda), Uganda Bureau of Statistics. Uganda National Service Delivery Survey 2008.                                                                                                            | Estimates considered implausible. Survey estimates are inconsistent with both admin estimates and estimates from other established survey series (2006 DHS)                                                                                    |

193

194 **Supplementary Table 3: Data excluded from GBD estimates but included in geostatistical model**

195

| Country    | Series                                   | Year(s) | Citation                                                                                                                                                                                                                   | Rationale for exclusion from GBD model                               |
|------------|------------------------------------------|---------|----------------------------------------------------------------------------------------------------------------------------------------------------------------------------------------------------------------------------|----------------------------------------------------------------------|
| Madagascar | Multiple Indicator Cluster Survey (MICS) | 2012    | National Institute of Statistics (Madagascar), United Nations Children's Fund (UNICEF). Madagascar - South Multiple Indicator Cluster Survey 2012. New York, United States: United Nations Children's Fund (UNICEF), 2015. | Not nationally representative. Only sampled the south of Madagascar. |
| Kenya      | Multiple Indicator Cluster Survey (MICS) | 2007    | Kenya National Bureau of Statistics, United Nations Children's Fund (UNICEF). Kenya - North Eastern Province Multiple Indicator Cluster Survey 2007. Nairobi, Kenya: Kenya National Bureau of Statistics.                  | Not nationally representative. Only sampled North Eastern province.  |

196

197

198 **3.1 Data sources excluded from model**

199  
200 In order to evaluate for the possibility of systematic survey bias, national-level time series of survey estimates of  
201 DPT coverage were reviewed for each country along with national-level coverage estimates from WHO, GBD, and  
202 the geospatial models. When a survey's estimates appeared implausible in comparison with other existing survey-  
203 based data sources, the survey methodology was inspected to evaluate for any apparent differences in case  
204 definitions, data collection, or other methodological explanations for the observed discrepancy. Data from surveys  
205 with implausible results were also mapped spatially and reviewed in order to identify surveys that were non-  
206 nationally representative (and therefore excluded from GBD models) but could provide useful spatial information  
207 for the geospatial models.

208  
209 Supplementary Table 2 shows data sources that were identified during the data search process and met general  
210 inclusion criteria but were specifically excluded from the model due to reported vaccine deemed implausible based  
211 on review of corroborating sources or with known methodologic flaws. For each survey, reasons for exclusion are  
212 specified in the table.

213  
214 **3.2 Data preparation**

215  
216 Both vaccine card and maternal recall data were extracted from all sources; vaccine card data was preferentially  
217 used and maternal recall only if no vaccine card data were available. Within each source, data with missing spatial  
218 identifiers, age information, or survey weights were excluded, as were any areal units that consisted of a single  
219 individual (as survey-adjusted means could not be calculated for such units).

220 Supplementary Figure 1 shows the survey data identification and extraction process as well as data loss during data  
221 cleaning steps.

222  
223 Individual ages were determined using age in months at the time of survey when available and age in years  
224 otherwise. Individuals were then assigned to birth cohorts based on age at the time of the survey observation (12-23  
225 months, 24-35 months, 36-47 months, and 48-59 months). The data corresponding to each birth cohort were then  
226 included in the geospatial modelling process in the year during which the birth cohort was 12-23 months of age. In  
227 other words, for a survey conducted in year  $Y$ , data from 12-23 month olds were included in year  $Y$ , data from 24-35  
228 month olds in year  $Y-1$ , and data from other cohorts included analogously. Including data from children older than  
229 23 months of age assumes negligible catch-up vaccination and does not capture effects of migration or differential  
230 mortality by vaccination, but broadens the geographical representativeness of the model by including of data from  
231 locations where no children 12-23 months of age were sampled, but data from older children was available.

232  
233 Given the limitations of this approach, we considered whether an adjustment could be made to data from children  $\geq$   
234 23 months to account for some or all of these effects. Supplementary Figure 2 shows a line plot of age-cohort-  
235 specific DPT3 coverage, by survey, in comparison to the observed coverage in the baseline age cohort. While there  
236 is substantial variation in the age-cohort-specific coverage pattern by survey, there was no consistent evidence of  
237 either a positive or a negative trend in coverage across age cohorts. Given these results, we elected not to apply a  
238 bias correction to vaccine coverage data from age cohorts  $> 24$  months. Further methods development will be  
239 required to better incorporate age-specific coverage effects into a temporally-varying model-based geostatistical  
240 framework.

241  
242

**A. Geospatial Survey Data Extraction Flowchart**

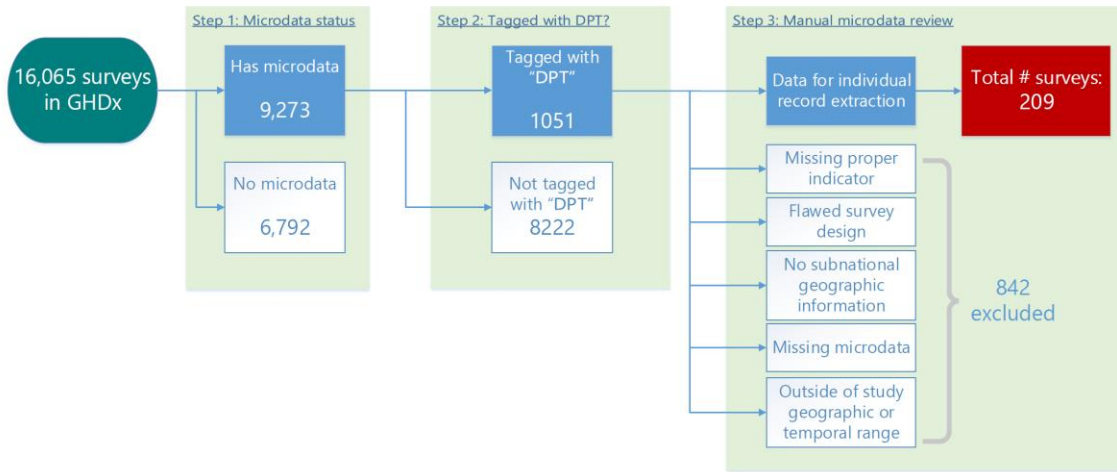

**B. Data Cleaning Flowchart**

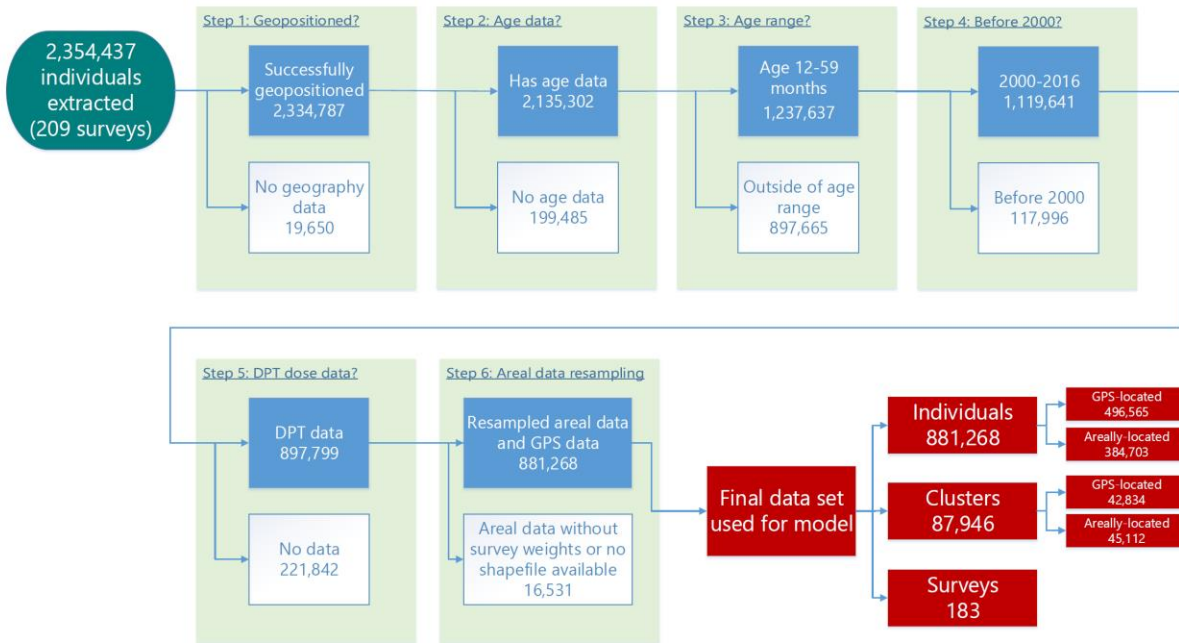

244  
245  
246  
247  
248

249 **Supplementary Figure 2: Weighted DPT3 coverage, by age cohort and survey.**

250 Each line represents weighted age-cohort-specific DPT3 coverage for one survey. The lines trace the difference in  
251 DPT3 coverage (y-axis) between a given age cohort (x-axis) and the baseline age cohort (12-23 month olds). The  
252 line of constant coverage across age cohorts is represented as a black dotted line, and the red line represents the  
253 sample-size weighted average of coverage differences across all surveys.

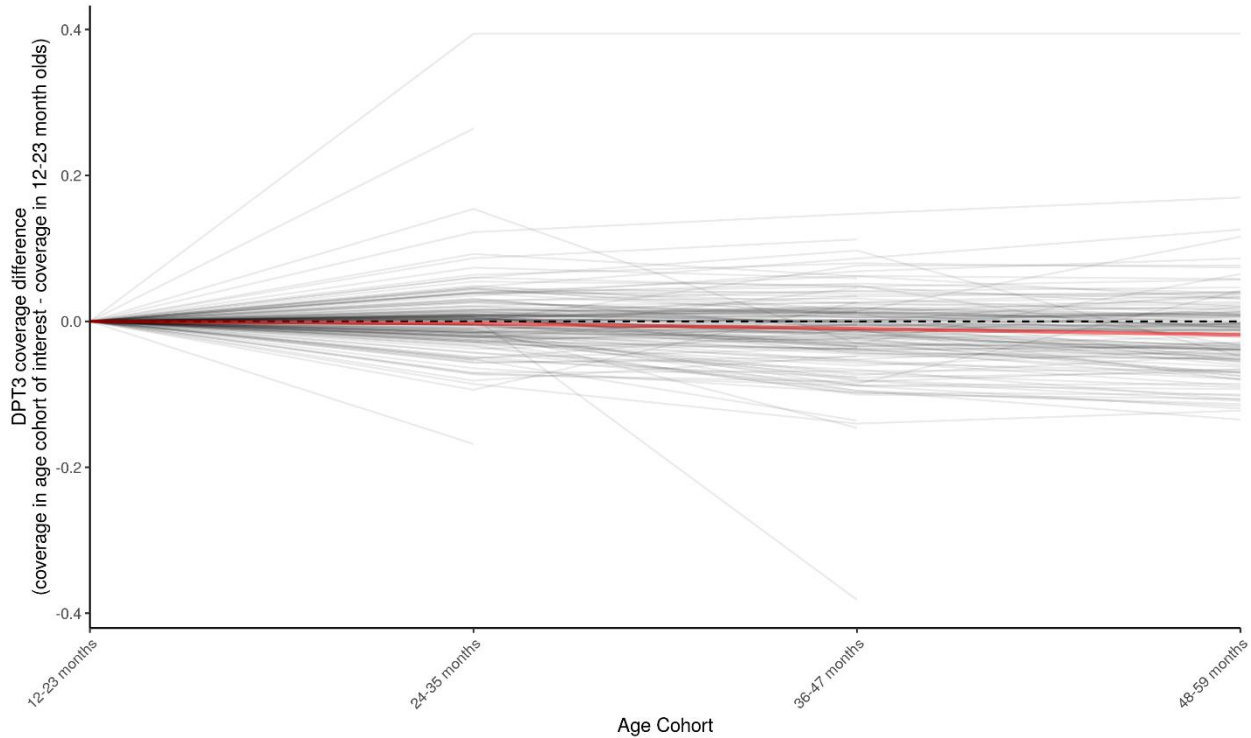

254  
255

256 **3.3 Geographic positioning of clusters and spatial integration of areal data**

257

258 Individual-level data were processed as described above, then summarized to smallest geographic resolution  
259 available. Each individual survey record was matched by primary sampling unit to the smallest geographic area  
260 available. When geographic coordinates were not available, the names of the smallest available representative  
261 administrative units were extracted. If these units were smaller than 5x5km, each unit was assigned a latitude and  
262 longitude from the centroid of the representative area. Otherwise, these units were then matched to administrative  
263 shapefiles that were either obtained from the survey itself or taken from the Global Administrative Unit Layers  
264 database<sup>3</sup> or the Database of Global Administrative Areas.<sup>4</sup>

265

266 In the model-based geostatistical framework used in this study, all input data must be located at the  
267 latitude/longitude level. For areal data with no precise latitude and longitude available but that could be spatially  
268 matched to an administrative unit or other subnational geography, a previously-described spatial integration  
269 approach<sup>5-7</sup> was used to create weighted candidate points from each set of areal data while accounting for survey  
270 weights.

271

272 Briefly, for each areal unit within a survey for which precise geographic coordinates were not available, an estimate  
273 of mean vaccine coverage was calculated from the individual-level data using survey weights and design effects  
274 using the *survey* package in R.<sup>8</sup> This mean estimate was matched with a spatial polygon representation of the areal  
275 unit from which the data were obtained, and 10,000 points were randomly sampled from within that polygon with  
276 the probability of selection proportional to the total population at that location in space and time according to the  
277 WorldPop total population raster.<sup>9,10</sup> From these randomly sampled points in space, k-means clustering was used to  
278 generate a set of integration points (1 per 1,000 5x5 km pixels within the polygon) that were used as input data for

279 the geospatial model. Each integration point was assigned the mean vaccine coverage estimate for the areal unit  
280 (generated using survey weights as above) and assigned a weight proportional to the number of randomly sampled  
281 points that were included in the k-means cluster such that all weights sum to 1.

282

283 The net effect of this process is to produce a set of candidate observations, where more populated locations within  
284 the areal unit are more likely to be selected, and points selected in higher-population-density areas are more heavily  
285 weighted. The total weighted sample size of this set of candidate points is identical to the sample size of the original  
286 individual-level data used in the resampling process. As an example of this process,



287 Supplementary Figure 3 shows an example of the survey-weighted mean estimates generated for each area, the  
288 population raster, the 10,000 points randomly sampled proportional to population, and the final k-means-clustered,  
289 weighted integration points that represent candidate observations to be used as model input data.  
290  
291

292 **Supplementary Figure 3: Spatial resampling of areal data**  
 293 Survey-weighted mean estimates of DTP3 coverage for each areal unit represented in a given country, survey, and  
 294 year (A); population raster from WorldPop used for the spatial resampling process (B); 10,000 points sampled  
 295 randomly proportionally to population (C); k-means clustered, weighed integration points to be used as candidate  
 296 observations in the geospatial model (D).  
 297

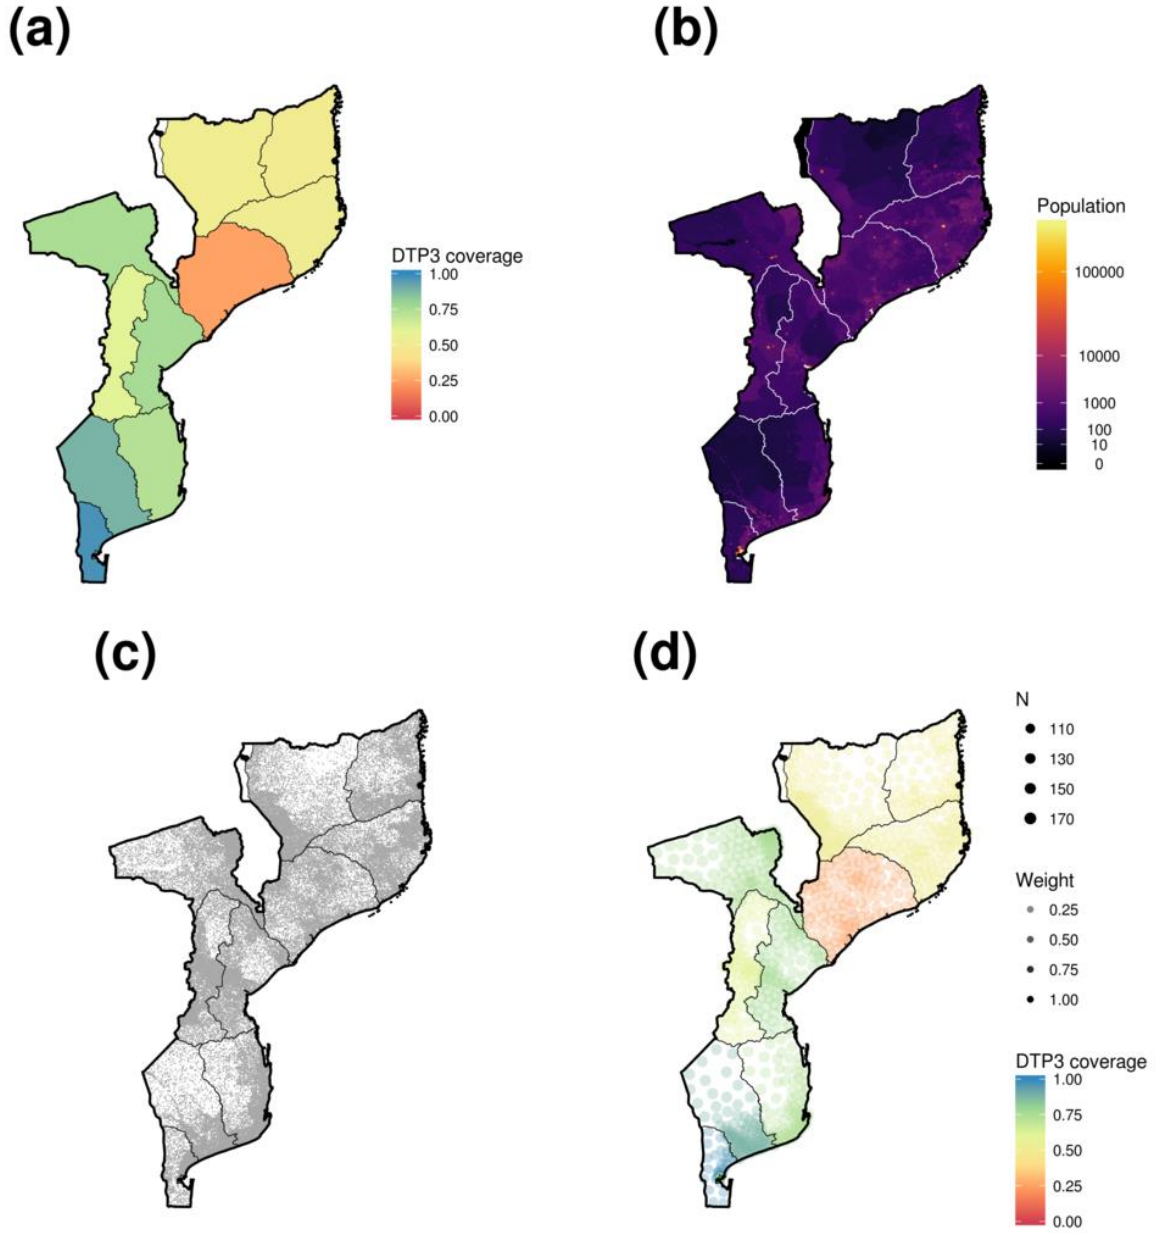

298  
 299  
 300 **4.0 Covariates**  
 301  
 302 A suite of socioeconomic and environmental covariates was assembled in order to enhance the ability of the model  
 303 to predict vaccine coverage. Supplementary Table 4 details the spatial and temporal resolution of each included  
 304 covariate and provides references. Maps of high-resolution spatial covariates can be found in Supplementary Figure  
 305 4.  
 306

307  
308  
309

**Supplementary Table 4: Covariates used in mapping of vaccine coverage.**

Covariates are listed as “GBD” obtained at the national level using estimates from the Global Burden of Disease Study 2016.<sup>11</sup>

| Covariate                            | Spatial resolution | Temporal resolution | Source                                   | Reference                                                                                                                                                                                                                                                                                                                                                                                                                                                                                                                                                                                            |
|--------------------------------------|--------------------|---------------------|------------------------------------------|------------------------------------------------------------------------------------------------------------------------------------------------------------------------------------------------------------------------------------------------------------------------------------------------------------------------------------------------------------------------------------------------------------------------------------------------------------------------------------------------------------------------------------------------------------------------------------------------------|
| Antenatal care coverage (4 visits)   | National           | Annual              | GBD                                      | GBD covariate: “Proportion of pregnant woman receiving 4 or more antenatal care visits including 1 or more from a skilled provider”                                                                                                                                                                                                                                                                                                                                                                                                                                                                  |
| Average daily maximum temperature    | 5x5 km             | Annual              | CRUTS                                    | Harris, I., Jones, P. D., Osborn, T. J. & Lister, D. H. Updated high-resolution grids of monthly climatic observations – the CRU TS3.10 dataset. <i>Int. J. Climatol.</i> <b>34</b> , 623–642 (2014).<br>University of East Anglia. Climatic Research Unit TS v. 3.24 dataset. Available at: <a href="https://crudata.uea.ac.uk/cru/data/hrg/cru_ts_3.24.01/">https://crudata.uea.ac.uk/cru/data/hrg/cru_ts_3.24.01/</a> . (Accessed: 24th July 2017).                                                                                                                                               |
| Daytime LST                          | 5x5 km             | Annual              | MODIS                                    | USGS & NASA. Land surface temperature and emissivity 8-day L3 global 1km MOD11A2 dataset. Available at: <a href="https://lpdaac.usgs.gov/dataset_discovery/modis/modis_products_table/mod11a2">https://lpdaac.usgs.gov/dataset_discovery/modis/modis_products_table/mod11a2</a> . (Accessed: 24th July 2017)<br>Wan, Z. MODIS Land-Surface Temperature Algorithm Theoretical Basis Document (LST ATBD).<br>Weiss, D. J. et al. An effective approach for gap-filling continental scale remotely sensed time-series. <i>Isprs J. Photogramm. Remote Sens.</i> <b>98</b> , 106–118 (2014).             |
| Distance to rivers and lakes ≥ 50 km | 5x5 km             | Static              | Natural Earth Data (derived)             | Natural Earth. Rivers and lake centerlines dataset. Available at: <a href="http://www.naturalearthdata.com/downloads/10m-physical-vectors/10m-rivers-lake-centerlines/">http://www.naturalearthdata.com/downloads/10m-physical-vectors/10m-rivers-lake-centerlines/</a> . (Accessed: 24th July 2017)                                                                                                                                                                                                                                                                                                 |
| Diurnal difference in LST            | 5x5 km             | Annual              | MODIS                                    | USGS & NASA. Land surface temperature and emissivity 8-day L3 global 1km MOD11A2 dataset. Available at: <a href="https://lpdaac.usgs.gov/dataset_discovery/modis/modis_products_table/mod11a2">https://lpdaac.usgs.gov/dataset_discovery/modis/modis_products_table/mod11a2</a> . (Accessed: 24th July 2017)<br>Wan, Z. MODIS Land-Surface Temperature Algorithm Theoretical Basis Document (LST ATBD).<br>Weiss, D. J. et al. An effective approach for gap-filling continental scale remotely sensed time-series. <i>Isprs J. Photogramm. Remote Sens.</i> <b>98</b> , 106–118 (2014).             |
| Diurnal temperature range            | 5x5 km             | Annual              | CRUTS                                    | Harris, I., Jones, P. D., Osborn, T. J. & Lister, D. H. Updated high-resolution grids of monthly climatic observations – the CRU TS3.10 dataset. <i>Int. J. Climatol.</i> <b>34</b> , 623–642 (2014).<br>University of East Anglia. Climatic Research Unit TS v. 3.24 dataset. Available at: <a href="https://crudata.uea.ac.uk/cru/data/hrg/cru_ts_3.24.01/">https://crudata.uea.ac.uk/cru/data/hrg/cru_ts_3.24.01/</a> . (Accessed: 24th July 2017).                                                                                                                                               |
| Elevation                            | 5x5 km             | Static              | National Geophysical Data Center, NOAA   | National Geophysical Data Center, National Oceanic and Atmosphere Administration. Global Land One-kilometre Base Elevation. Boulder, United States: National Geophysical Data Center, National Oceanic and Atmosphere Administration, 1999.                                                                                                                                                                                                                                                                                                                                                          |
| Enhanced Vegetation Index (EVI)      | 5x5 km             | Annual              | MODIS                                    | Huete, A., Justice, C. & van Leeuwen, W. MODIS vegetation index (MOD 13) algorithm theoretical basis document. (1999).<br>USGS & NASA. Vegetation indices 16-Day L3 global 500m MOD13A1 dataset. Available at: <a href="https://lpdaac.usgs.gov/dataset_discovery/modis/modis_products_table/mod13a1">https://lpdaac.usgs.gov/dataset_discovery/modis/modis_products_table/mod13a1</a> . (Accessed: 25th July 2017)<br>Weiss, D. J. et al. An effective approach for gap-filling continental scale remotely sensed time-series. <i>Isprs J. Photogramm. Remote Sens.</i> <b>98</b> , 106–118 (2014). |
| Fertility                            | 5x5 km             | Annual              | WorldPop (derived)                       | Lloyd, C. T., Sorichetta, A. & Tatem, A. J. High resolution global gridded data for use in population studies. <i>Sci. Data</i> <b>4</b> , sdata20171 (2017).<br>World Pop. Get data. Available at: <a href="http://www.worldpop.org.uk/data/get_data/">http://www.worldpop.org.uk/data/get_data/</a> . (Accessed: 25th July 2017)                                                                                                                                                                                                                                                                   |
| Global Protected Areas               | 5x5 km             | Annual              | World Database of Protected Areas (WDPA) | UNEP-WCMC and IUCN. Protected Planet: The World Database on Protected Areas (WDPA) Cambridge, UK: UNEP-WCMC and IUCN, 2018. Available at: <a href="https://www.protectedplanet.net">https://www.protectedplanet.net</a> (Accessed: 23 <sup>rd</sup> January 2018).                                                                                                                                                                                                                                                                                                                                   |
| Growing season length                | 5x5 km             | Static              | FAO                                      | FAO. GAEZ - Global Agro-Ecological Zones data portal. Available at: <a href="http://www.fao.org/nr/gaez/about-data-portal/en/">http://www.fao.org/nr/gaez/about-data-portal/en/</a> . (Accessed: 25th July 2017)<br>FAO. GAEZ - Global Agro-Ecological Zones users guide. (2012).                                                                                                                                                                                                                                                                                                                    |
| Irrigation                           | 5x5 km             | Static              | University of Frankfurt                  | Goethe-Universität. Generation of a digital global map of irrigation areas. Available at: <a href="https://www.uni-frankfurt.de/45218039/Global_Irrigation_Map">https://www.uni-frankfurt.de/45218039/Global_Irrigation_Map</a> . (Accessed: 25th July 2017)                                                                                                                                                                                                                                                                                                                                         |
| Lag-distributed income per capita    | National           | Annual              | GBD                                      | GBD covariate: “Lag distributed income per capita (I\$): gross domestic product per capita that has been smoothed over the preceding 10 years”                                                                                                                                                                                                                                                                                                                                                                                                                                                       |

| Covariate                                                    | Spatial resolution | Temporal resolution | Source                                                                                                                          | Reference                                                                                                                                                                                                                                                                                                                                                                                                                                                                                                                                                                                                           |
|--------------------------------------------------------------|--------------------|---------------------|---------------------------------------------------------------------------------------------------------------------------------|---------------------------------------------------------------------------------------------------------------------------------------------------------------------------------------------------------------------------------------------------------------------------------------------------------------------------------------------------------------------------------------------------------------------------------------------------------------------------------------------------------------------------------------------------------------------------------------------------------------------|
| Malaria incidence                                            | 5x5 km             | Annual              | Malaria Atlas Project                                                                                                           | Bhatt, S. et al. The effect of malaria control on <i>Plasmodium falciparum</i> in Africa between 2000 and 2015. <i>Nature</i> <b>526</b> , 207–211 (2015).                                                                                                                                                                                                                                                                                                                                                                                                                                                          |
| Maternal Education                                           | 5x5 km             | Annual              | Internally Modelled – IHME LBD                                                                                                  | Graetz N, Friedman J, Osgood-Zimmerman A, et al. Mapping local variation in educational attainment across Africa. <i>Nature</i> . 2018;555(7694):48-53.                                                                                                                                                                                                                                                                                                                                                                                                                                                             |
| Mortality rate due to war and terrorism in the past 10 years | National           | Annual              | GBD                                                                                                                             | GBD covariate: “Mean mortality rate in the previous ten years due to war and terrorism, measured from year’s end, current year included”                                                                                                                                                                                                                                                                                                                                                                                                                                                                            |
| Nighttime lights                                             | 5x5 km             | Annual              | NOAA DMSP                                                                                                                       | Savory et al. Inter-calibration and Gaussian Process Modelling of Nighttime Lights Imagery for Measuring Urbanization Trends in Africa 2000–2013. <i>Remote Sens.</i> <b>9</b> , (2017).                                                                                                                                                                                                                                                                                                                                                                                                                            |
| Normalized Difference Vegetation Index (NDVI)                | 5x5 km             | Annual              | AVHRR                                                                                                                           | NASA & NOAA. Advanced Very High Resolution Radiometer (AVHRR) Normalized Difference Vegetation Index (NDVI) dataset. Available at: <a href="https://nex.nasa.gov/nex/projects/1349/">https://nex.nasa.gov/nex/projects/1349/</a> . (Accessed: 25th July 2017)                                                                                                                                                                                                                                                                                                                                                       |
| Population                                                   | 5x5 km             | Annual              | WorldPop                                                                                                                        | Lloyd, C. T., Sorichetta, A. & Tatem, A. J. High resolution global gridded data for use in population studies. <i>Sci. Data</i> <b>4</b> , sdata20171 (2017).<br>World Pop. Get data. Available at: <a href="http://www.worldpop.org.uk/data/get_data/">http://www.worldpop.org.uk/data/get_data/</a> . (Accessed: 25th July 2017)                                                                                                                                                                                                                                                                                  |
| Potential Evapotranspiration (PET)                           | 5x5 km             | Annual              | CRUTS                                                                                                                           | Harris, I., Jones, P. D., Osborn, T. J. & Lister, D. H. Updated high-resolution grids of monthly climatic observations – the CRU TS3.10 dataset. <i>Int. J. Climatol.</i> <b>34</b> , 623–642 (2014).<br>University of East Anglia. Climatic Research Unit TS v. 3.24 dataset. Available at: <a href="https://crudata.uea.ac.uk/cru/data/hrg/cru_ts_3.24.01/">https://crudata.uea.ac.uk/cru/data/hrg/cru_ts_3.24.01/</a> . (Accessed: 24th July 2017).                                                                                                                                                              |
| Precipitation                                                | 5x5 km             | Annual              | MSWEP                                                                                                                           | Beck, H.E., A.I.J.M. van Dijk, V. Levizzani, J. Schellekens, D.G. Miralles, B. Martens, A. de Roo: MSWEP: 3-hourly 0.25 global gridded precipitation (1979-2015) by merging gauge, satellite, and reanalysis data, <i>Hydrology and Earth System Sciences</i> , 21(1), 589-615, 2017.                                                                                                                                                                                                                                                                                                                               |
| Tassled cap brightness                                       | 5x5 km             | Annual              | MODIS                                                                                                                           | USGS & NASA. Nadir BRDF- Adjusted Reflectance Reflectance 16-Day L3 Global 1km dataset. Available at: <a href="https://lpdaac.usgs.gov/dataset_discovery/modis/modis_products_table/mcd43b4">https://lpdaac.usgs.gov/dataset_discovery/modis/modis_products_table/mcd43b4</a> . (Accessed: 25th July 2017)<br>Strahler, A. H. & Muller, J.-P. MODIS BRDF/Albedo product: algorithm theoretical basis document version 5.0. (1999).<br>Weiss, D. J. et al. An effective approach for gap-filling continental scale remotely sensed time-series. <i>Isprs J. Photogramm. Remote Sens.</i> <b>98</b> , 106–118 (2014). |
| Tassled cap wetness                                          | 5x5 km             | Annual              | MODIS                                                                                                                           | USGS & NASA. Nadir BRDF- Adjusted Reflectance Reflectance 16-Day L3 Global 1km dataset. Available at: <a href="https://lpdaac.usgs.gov/dataset_discovery/modis/modis_products_table/mcd43b4">https://lpdaac.usgs.gov/dataset_discovery/modis/modis_products_table/mcd43b4</a> . (Accessed: 25th July 2017)<br>Strahler, A. H. & Muller, J.-P. MODIS BRDF/Albedo product: algorithm theoretical basis document version 5.0. (1999).                                                                                                                                                                                  |
| Travel time to nearest settlement >50,000 inhabitants        | 5x5 km             | Static              | Malaria Atlas Project, Oxford Big Data Institute, Li Ka Shing Centre for Health Information and Discovery, University of Oxford | D.J. Weiss <i>et al.</i> A global map of travel time to cities to assess inequalities in accessibility in 2015. <i>Nature</i> doi:10.1038/nature25181 (preprint, 2018)                                                                                                                                                                                                                                                                                                                                                                                                                                              |
| Urbanicity                                                   | 5x5 km             | Annual              | European Commission/GHS                                                                                                         | Pesaresi, M. et al. Operating procedure for the production of the Global Human Settlement Layer from Landsat data of the epochs 1975, 1990, 2000, and 2014. (Publications Office of the European Union, 2016).                                                                                                                                                                                                                                                                                                                                                                                                      |
| Wet day frequency                                            | 5x5 km             | Annual              | CRUTS                                                                                                                           | Harris, I., Jones, P. D., Osborn, T. J. & Lister, D. H. Updated high-resolution grids of monthly climatic observations – the CRU TS3.10 dataset. <i>Int. J. Climatol.</i> <b>34</b> , 623–642 (2014).<br>University of East Anglia. Climatic Research Unit TS v. 3.24 dataset. Available at: <a href="https://crudata.uea.ac.uk/cru/data/hrg/cru_ts_3.24.01/">https://crudata.uea.ac.uk/cru/data/hrg/cru_ts_3.24.01/</a> . (Accessed: 24th July 2017).                                                                                                                                                              |

311 **Supplementary Figure 4: Maps of included high-resolution covariates.**  
 312 Each time-varying covariate is represented by a map for the year 2016.  
 313

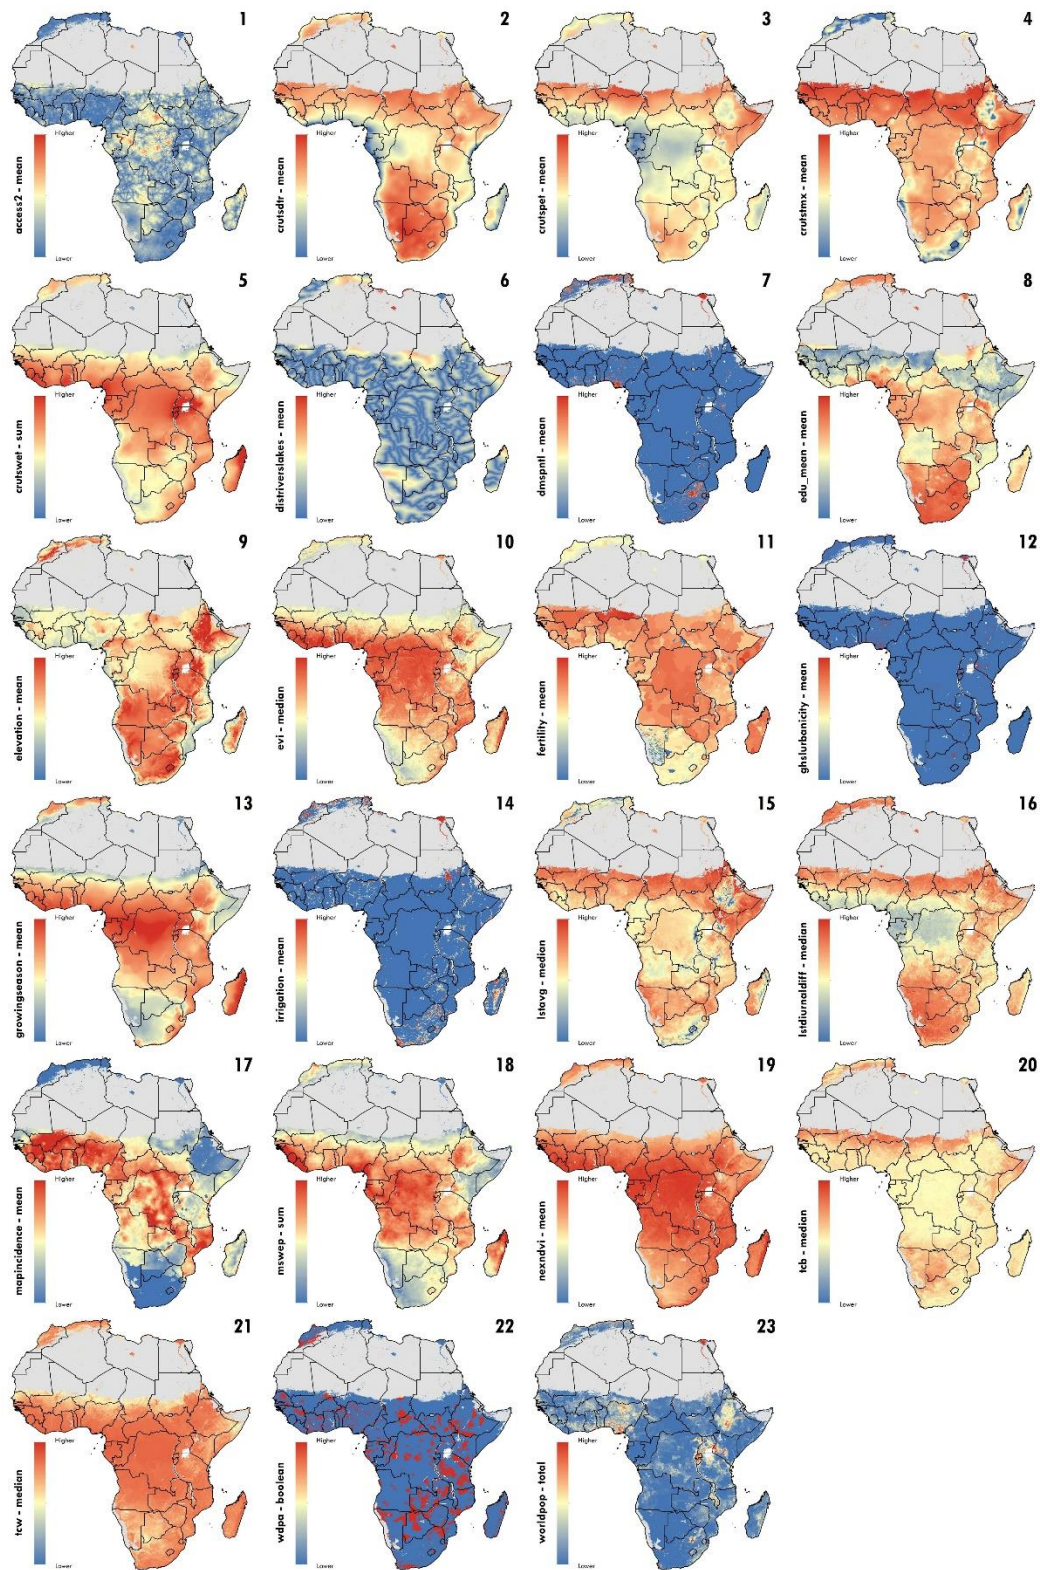

314

315 **5.0 Geostatistical Model**

316

317 **5.1 Overview of modelling process**

318

319 A schematic overview of the modelling process can be found in Supplementary Figure 5. Briefly, a point-level  
320 vaccine coverage dataset was created and a suite of spatial covariates assembled as described above. For each  
321 modelled quantity, five regional sub-models were run. For each regional sub-model, an ensemble covariate  
322 modelling method (stacked generalization<sup>12</sup>) was used to capture complex interactions and non-linear relationships  
323 between covariates and vaccine coverage. The outputs of this ensemble modelling approach are covariate-based  
324 predictions of vaccine coverage, which were then themselves used as covariates in the geospatial (model-based  
325 geostatistical) model. The geospatial model leverages covariates and spatiotemporal patterns in the data to produce  
326 1,000 candidate maps (samples or draws) each of which represents a possible representation of vaccine coverage at  
327 all modelled spaces and times.

328

329 In order to estimate DPT1 coverage, DPT3 coverage, and dropout in an internally consistent manner, a conditional  
330 ordinal regression framework was employed. In this framework, the above process was repeated three times for  
331 different measures of conditional vaccine coverage, which were then combined arithmetically to produce estimates  
332 of the distribution of vaccine coverage at that draw level (see section 5.4.5 for details). (In other words, for each  
333 modelled location in space and time, this framework generates 1,000 possible distributions of the proportion of  
334 children receiving 0, 1, 2, or 3+ doses of DPT). From these estimates, DPT1 coverage, DPT3 coverage, and dropout  
335 were similarly calculated at the draw level.

336

337 These estimates were then calibrated to national-level estimates of DPT coverage generated using methodology  
338 from the Global Burden of Diseases, Injuries, and Risk Factors Study (GBD) 2017. These national-level estimates  
339 additionally leverage bias-corrected administrative data to better capture overall time trends in places where survey-  
340 based data is scant. Finally, these estimates were summarized as mean estimates of vaccine coverage with  
341 associated uncertainty at the 5x5 km and first and second administrative levels. The probability of meeting GVAP  
342 targets in the year 2016 was calculated for countries and second-order administrative units as the percentage of  
343 draws where the targets were met. To analyse changes in DPT coverage over time across Africa at the second  
344 administrative level, the proportion of second-level administrative units with increasing coverage from 2000 to 2016  
345 was calculated at the draw level. This calculation results in a posterior distribution of the proportion of second-level  
346 administrative units experiencing an increase in coverage, which was then summarized as a mean and 95%  
347 uncertainty interval. The same calculations were repeated for decreases in coverage at the second administrative  
348 level.

349  
350

**Supplementary Figure 5: Overview of modelling process**

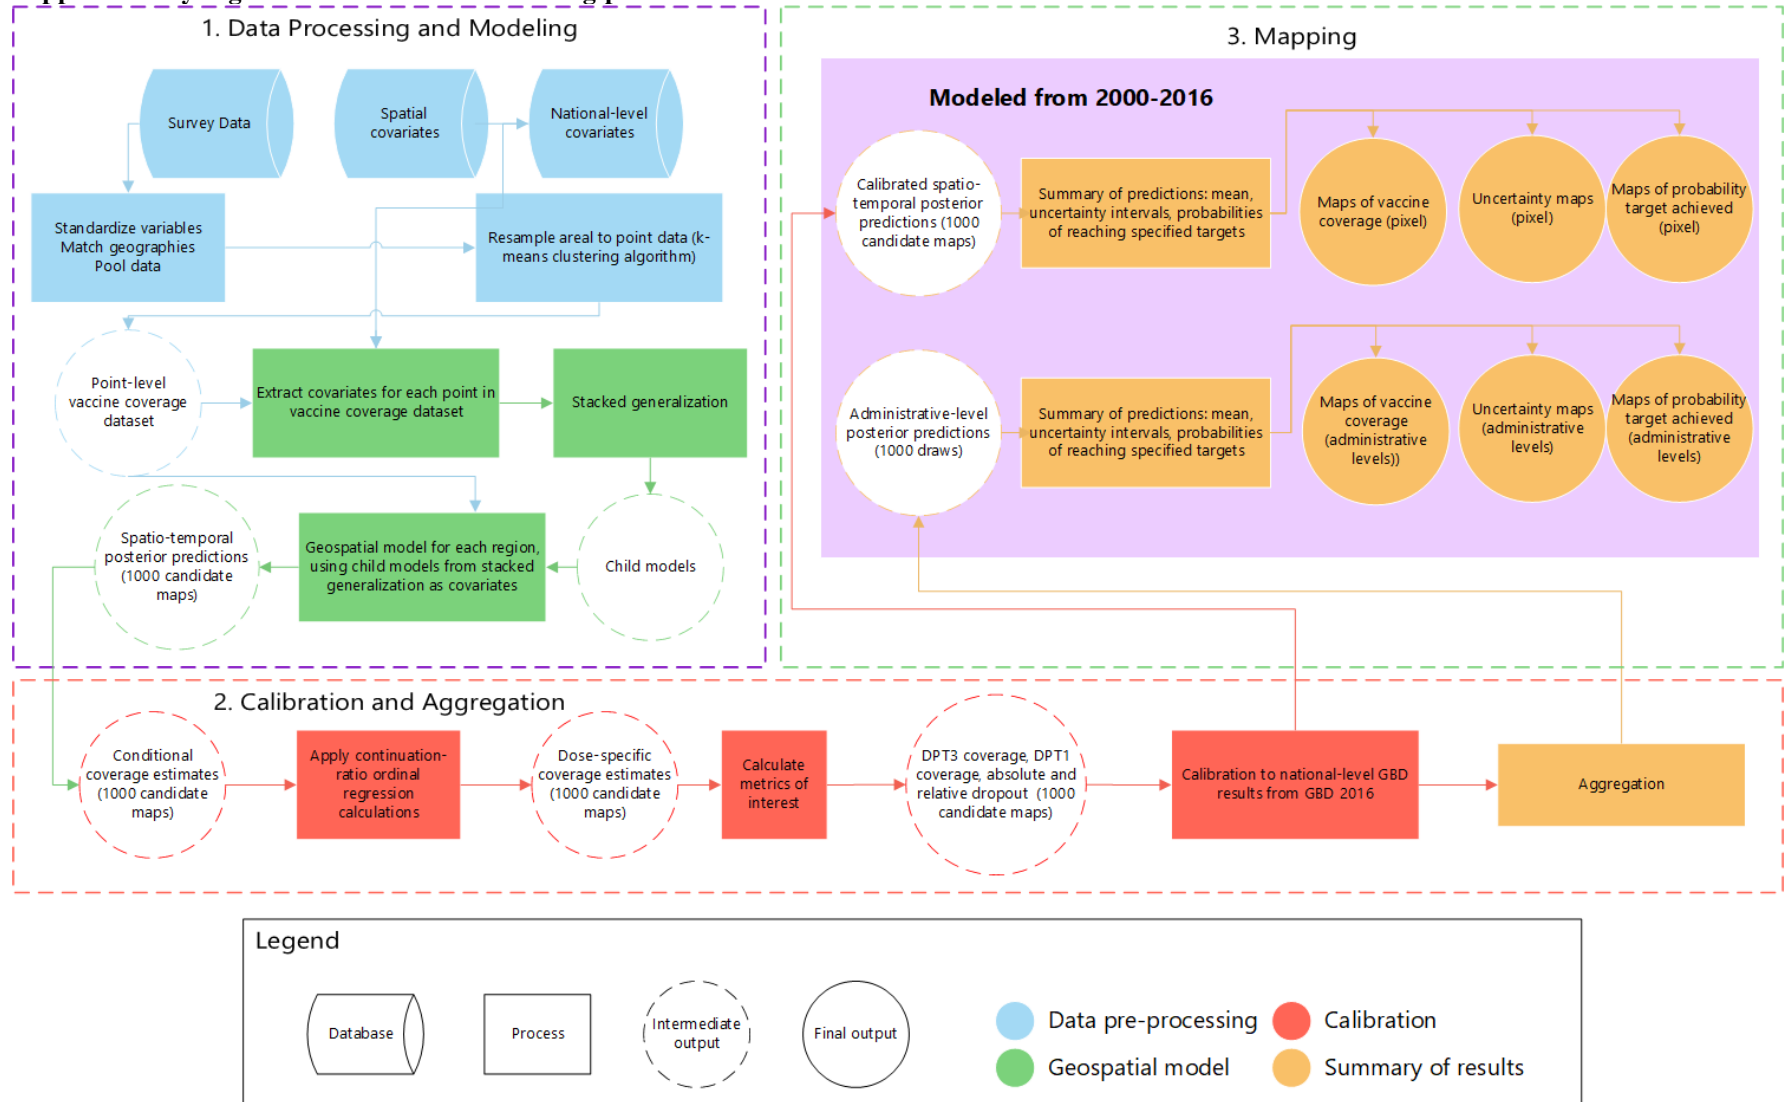

351

352  
353  
354  
355  
356  
357  
358  
359  
360  
361  
362  
363  
364  
365  
366  
367  
368  
369  
370  
371  
372  
373  
374  
375  
376  
377  
378  
379  
380  
381  
382  
383  
384  
385  
386  
387  
388  
389  
390  
391  
392  
393  
394  
395  
396  
397  
398  
399  
400  
401  
402

## 5.2 Regional model geographies

For each modelled vaccine coverage quantity, five regional geostatistical models were fit, then combined to create the final continental model of vaccine coverage. Models were run by region for two primary reasons. First, the continental scope of this analysis requires substantial computational resources, and fitting regional models improves computational feasibility when estimating with 1,000 samples from the posterior and including out-of-sample cross-validation. Second, fitting regional models allows additional subcontinental variation in the relationships between covariates and vaccine coverage and in the hyperparameters that govern the spatiotemporal patterns of vaccine coverage. Countries were assigned to regions within Africa that were chosen to align with the regions used in the Global Burden of Disease study, which group epidemiologically-similar countries into geographically proximate regions. These regions were then modified slightly to ensure geographic contiguity (eFigure 2). For each regional sub-model, data from the modelled region as well as data within a one-degree buffer of the region's boundary were included (in order to minimize regional edge effects).

## 5.3 Covariate ensemble modelling using stacked generalization

In order to capture potential complex interactions and non-linear relationships between covariates, an ensemble modelling approach (Gaussian Process stacked generalization) was employed, which has been previously shown to improve the predictive accuracy of geostatistical models.<sup>12</sup> This process is shown schematically in Supplementary Figure 6.

For each region and modelled vaccine coverage quantity, three sub-models were fit using the assembled set of spatial covariates as explanatory variables and the vaccine coverage quantity of interest as the outcome: generalized additive models, boosted regression trees, and lasso regression. For the boosted regression tree model, country-level fixed effects were also included in order to allow for differential relationships between covariates and vaccine coverage by country. Note that there are no explicit spatial or temporal effects included in these sub-models, although the underlying covariates are spatially and temporally correlated.

Sample weights were used in the data preparation process as applicable when calculating DPT coverage for areal units with no precise latitude/longitude available. For inclusion in the INLA geospatial model, each latitude/longitude-located cluster was then assigned a weight of 1, and each candidate observation generated by the spatial resampling process for areally-assigned data was assigned a sampling weight from the K-means clustering process as described above in section 3.3.

In order to avoid overfitting, each sub-model was fit using five-fold cross-validation, generating a set of out-of-sample predictions of vaccine coverage for each modelled location and year in the particular region. Each model was also fit with a full set of vaccine coverage outcome data, generating a corresponding set of in-sample predictions. The generated out-of-sample predictions for each of the three sub-models were included as explanatory covariates when fitting the geostatistical model described below, while the in-sample predictions from each of the three sub-models were used when generating predictions from the fitted geostatistical model. To illustrate the results of this process, the predicted in-sample vaccine coverage layers generated from the three sub-models (generalized additive models, boosted regression trees, and lasso regression) for 2016 (used to generate predictions from the geostatistical model) are shown in Supplementary Figure 7.

### Supplementary Figure 6: Example of covariate ensemble modelling

Using covariates and country-level fixed effects (in the case of boosted regression trees only) as explanatory variables and vaccine coverage data as outcome data, three separate sub-models (generalized additive models, lasso regression, and boosted regression trees) are fit using cross-validation to generate in- and out-of-sample predictions. The maps to the right of the figure show an example of the out-of-sample results of this process for a single year for



403 the Democratic Republic of the Congo. These out-of-sample predicted surfaces are then used as explanatory  
404 covariates in the full geostatistical model.  
405

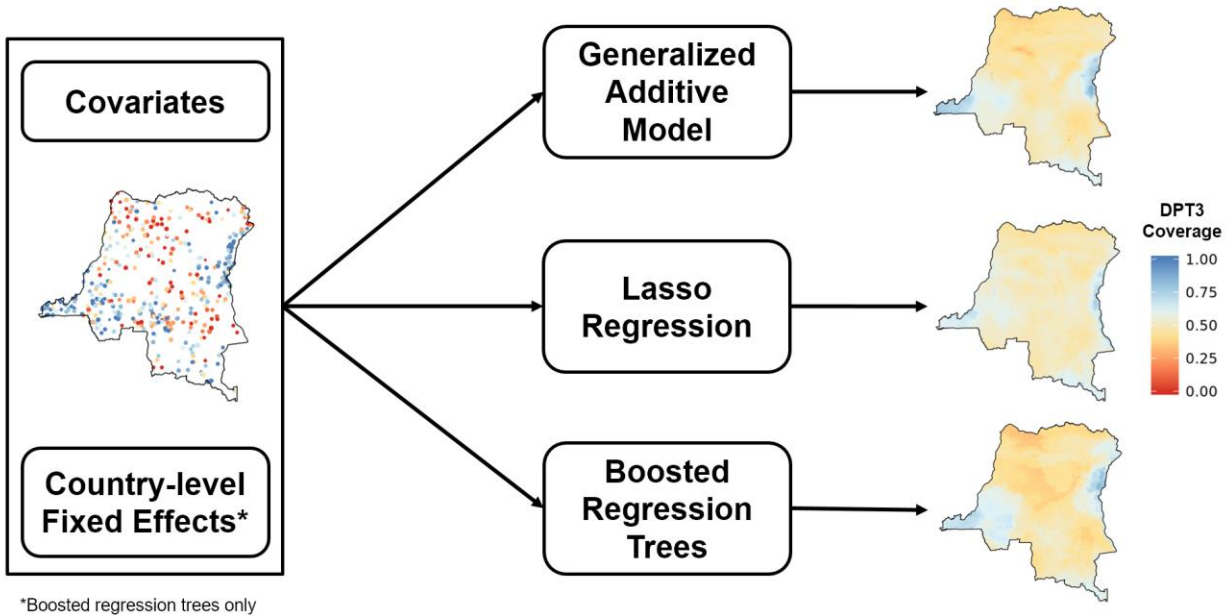

\*Boosted regression trees only

406  
407

408 **Supplementary Figure 7: Predicted in-sample DPT3 surfaces from the ensemble covariate modelling progress, 2016.**

409 Each map represents in-sample predicted DPT3 coverage generated from the three sub-models (GAM, generalized additive models; GBM, gradient boosted  
410 models [the particular implementation of boosted regression trees used in this analysis]; and lasso regression) for 2016. These surfaces were as covariates in the  
411 generation of predictions from the geostatistical model.  
412

2016

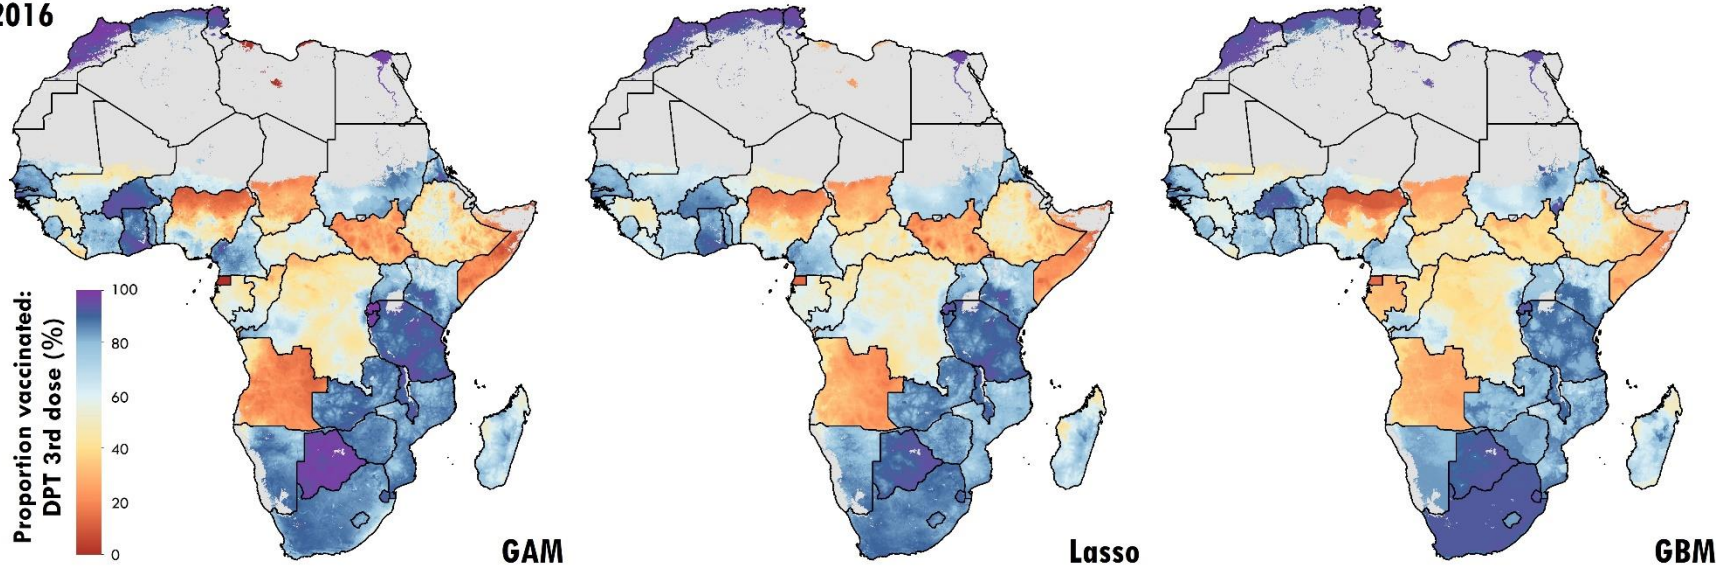

413

414 **5.3.1 Covariate extrapolation**

415  
416 Both at the level of the covariate ensemble model and in the full geostatistical model, relationships between  
417 covariates and vaccine coverage are leveraged in order to generate predictions of vaccine coverage in places and  
418 times when no survey observations are available (the full geostatistical model additionally leverages spatiotemporal  
419 patterns in coverage). These predictions require the assumption that the relationship between covariates and  
420 outcome is similar between places and times where data is available and those where no observations have been  
421 recorded.

422  
423 In addition, for some places and times, estimates may be generated in places where covariate values extend beyond  
424 the range of covariate values for which observed data is available. In these cases, the estimates generated represent  
425 extrapolations from observed covariate-vaccine coverage relationships in places where data are available. The  
426 extent to which these reported estimates represent extrapolations of covariate values (for the representative example  
427 of DPT3 coverage, as DPT1 coverage and dropout were estimated using the same set of data) is summarized in  
428 Supplementary Figure 8.

429  
430 **Supplementary Figure 8: Covariate extrapolation by model region**

431 Each plot shows the distribution of pixel values across all years for DPT3 coverage estimated by each of the sub-  
432 models (Generalized Additive Models [GAM], Gradient Boosted Model [GBM, the specific implementation of  
433 boosted regression trees used in this analysis], and lasso regression) from the ensemble modelling approach  
434 explained above, which are used as the covariates in INLA. Two distributions are displayed: pixel values  
435 corresponding to points in space and time where data observations are observed, and those corresponding to points  
436 in space and time where no data was available. Pixels without observed data which fall outside of the distribution of  
437 observed data represent points to which covariate extrapolations were made.

438  
439

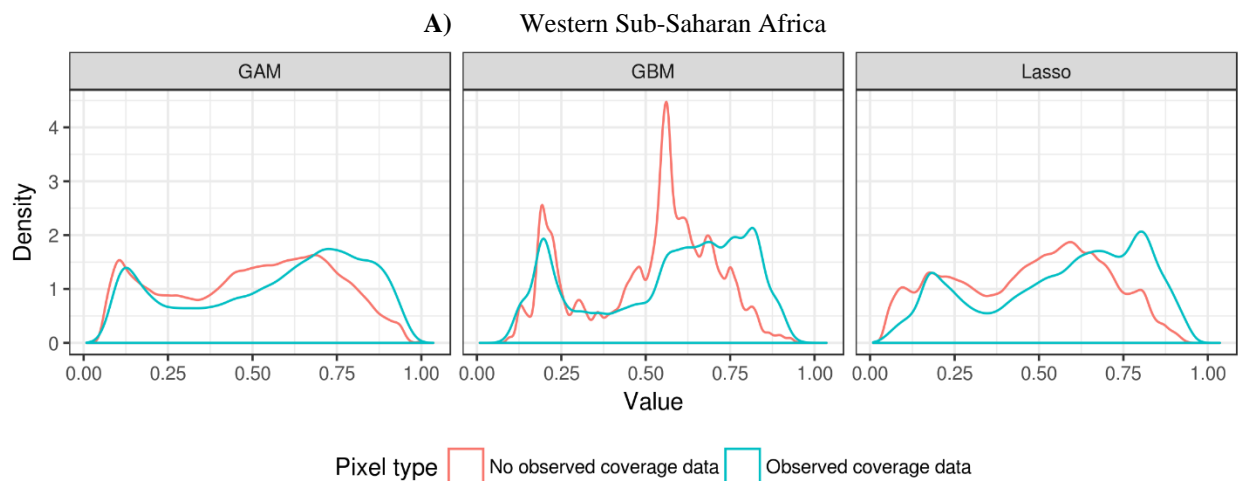

440  
441

442

**B) Central Sub-Saharan Africa**

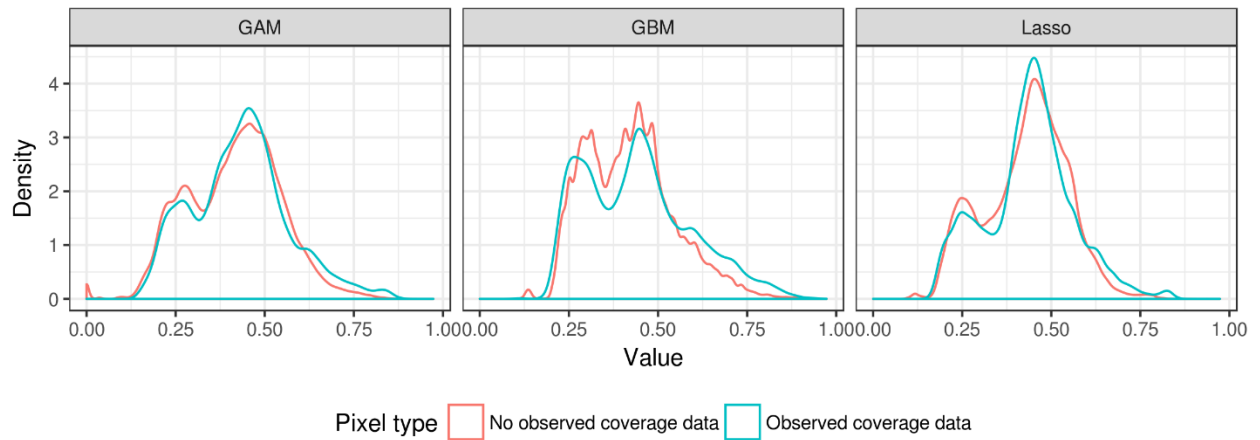

443

444

445

446

**C) Eastern Sub-Saharan Africa**

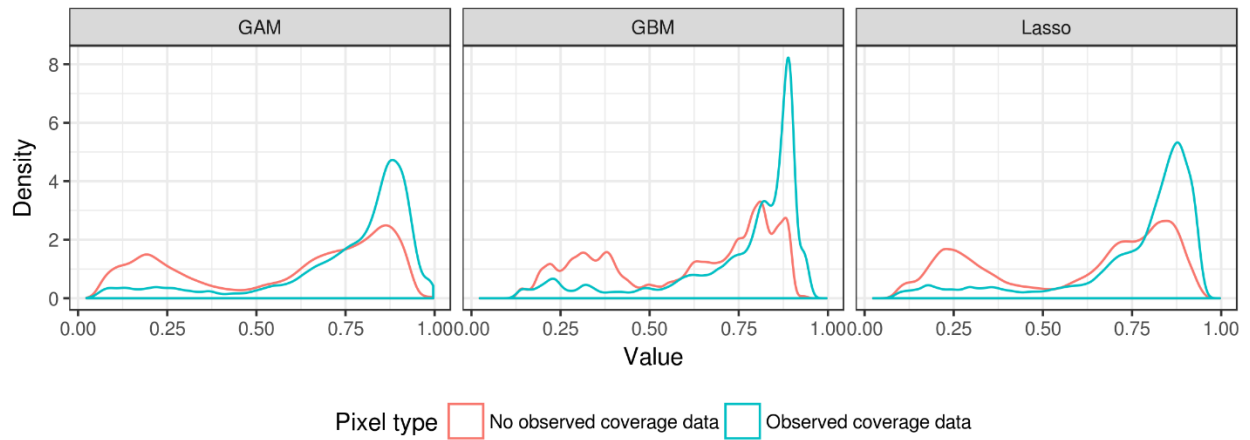

447

448

449

**D) Southern Sub-Saharan Africa**

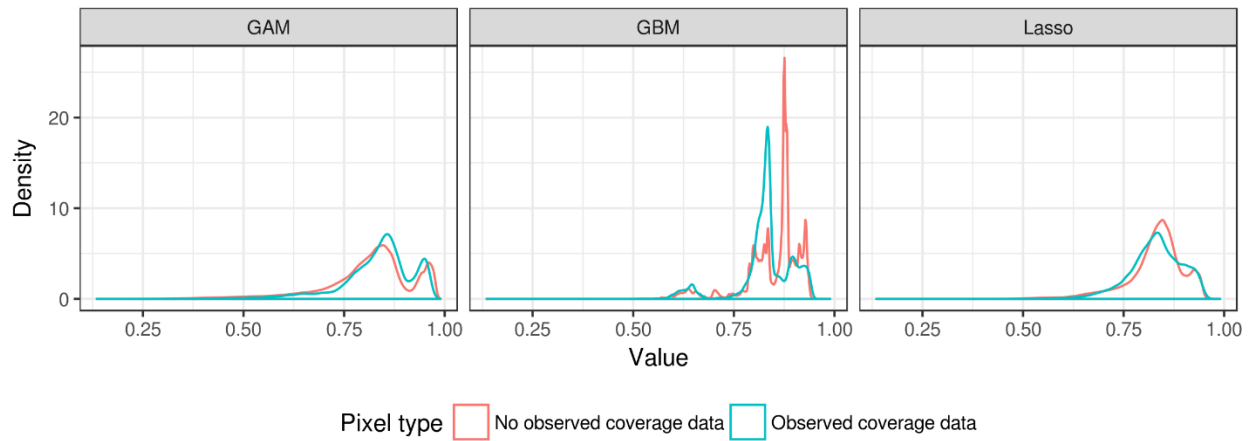

450

451

452

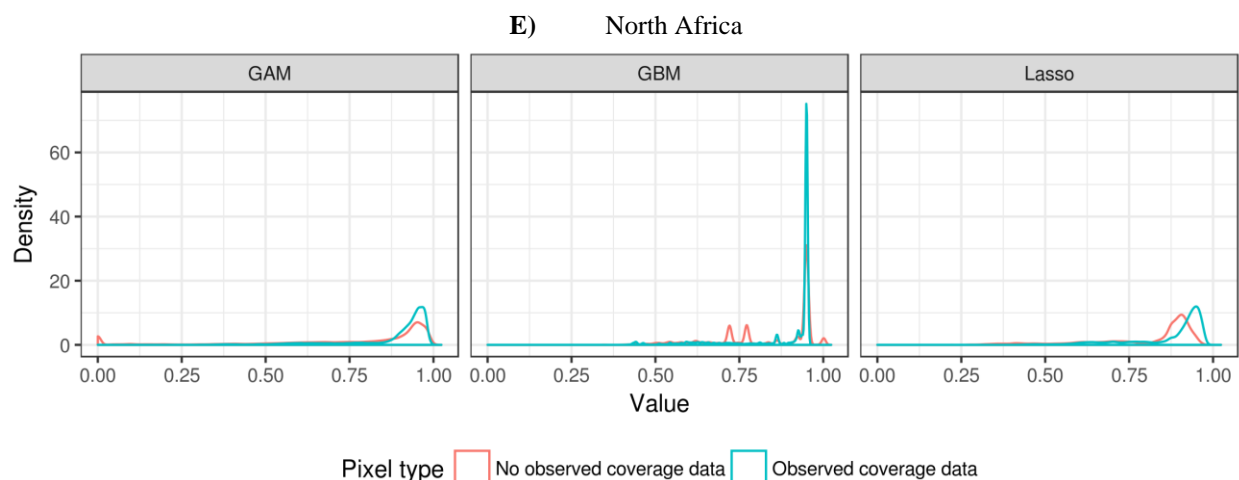

454

455

456

### 457 5.3.2 Relative covariate importance

458

459 The covariate ensemble modelling process used in this analysis emphasizes improvements in predictive validity, at  
 460 the cost of inferential analysis. In the final geostatistical model, the predicted DPT surfaces from each of the sub-  
 461 models (GAM, boosted regression trees, and lasso regression) are used as predictors of coverage, rather than the  
 462 covariates themselves. This allows for complex and non-linear interactions between covariates.

463

464 This complexity, however, makes the analysis of covariate-coverage relationships difficult. In addition, some of the  
 465 covariates (i.e. maternal education, malaria incidence) are themselves modelled, and the models used to produce  
 466 these spatial estimates utilize some of the same covariates as are included in the DPT coverage models. Any  
 467 analysis which attempts to infer which covariates drive the observed coverage patterns in this model, therefore,  
 468 should be undertaken with caution. Further methods are under development to overcome these limitations, in order  
 469 to allow simultaneous high predictive ability and inferential analysis.

470

471 With those caveats, the relative importance of each covariate within each component of the ensemble modelling  
 472 process can give some insight into which covariates are most influential in the overall model. Supplementary Figure  
 473 9 shows relative covariate importance plots for DPT3 for each modelled region. For each of the three sub-models  
 474 used in the ensemble modelling process, a relevant measure of covariate importance was calculated. For the GAM  
 475 model, the negative logs of covariate p-values were used; for boosted regression trees, relative influence; and for the  
 476 lasso regression, the Agresti method of generating standardized coefficients.<sup>13</sup> These relative importance metrics  
 477 were then normalized to sum to one within each sub-model.

478

479 To summarize the overall relative importance of each covariate in the full DPT3 model, a weighted average of these  
 480 sub-model-specific relative importance values was calculated for each covariate, using the beta coefficients for each  
 481 sub-model in the final geostatistical model as weights. In general, antenatal care, fertility, maternal education, lag-  
 482 distributed income per capita, and mortality rate due to war and terror in the last 10 years tended to have the highest  
 483 relative importance scores across modelled regions, although the precise patterns varied by region.

484

#### 485 **Supplementary Figure 9: Relative covariate importance plots.**

486 A separate plot is presented for each modelling region. In each plot, the top three rows each represent a sub-model  
 487 in the covariate ensemble modelling process, and each column represents a covariate. The colour within a given cell  
 488 represents the relative importance of the covariate within a given model. The “INLA combined” row at the bottom  
 489 of each plot displays a weighted average of these sub-model relative importance values for each covariate, using the

490 beta coefficients from the final fitted geostatistical model as weights. This serves as a proxy for the overall  
 491 influence of the covariate in the final model

492  
 493

**A) CSSA modelling region**

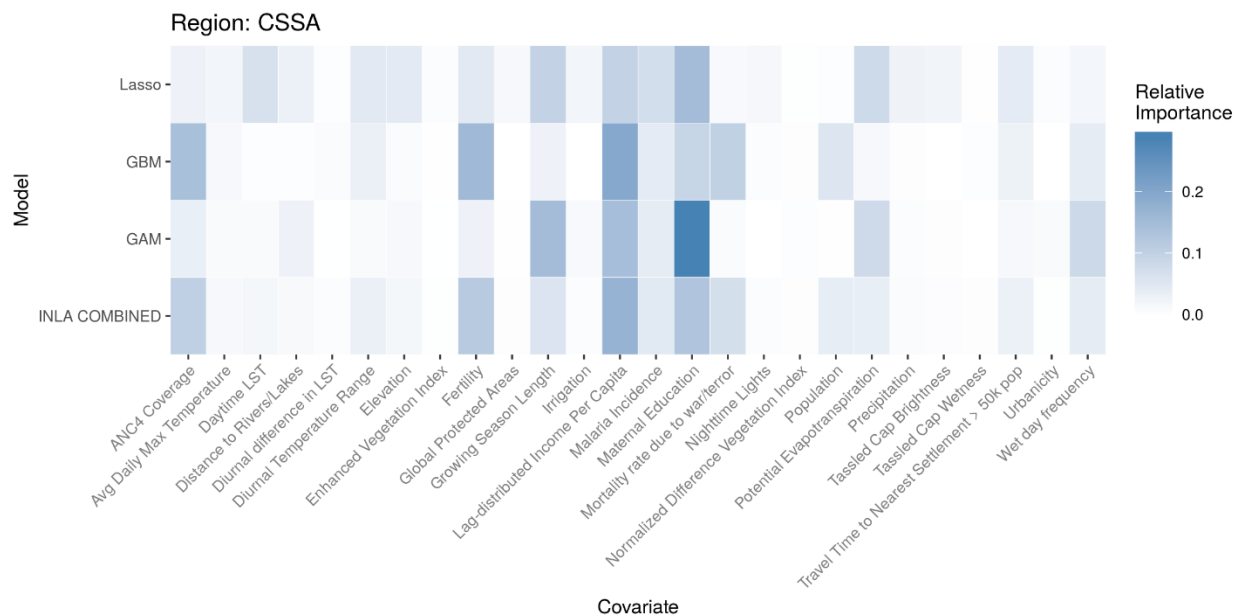

494  
 495  
 496

**B) ESSA modelling region**

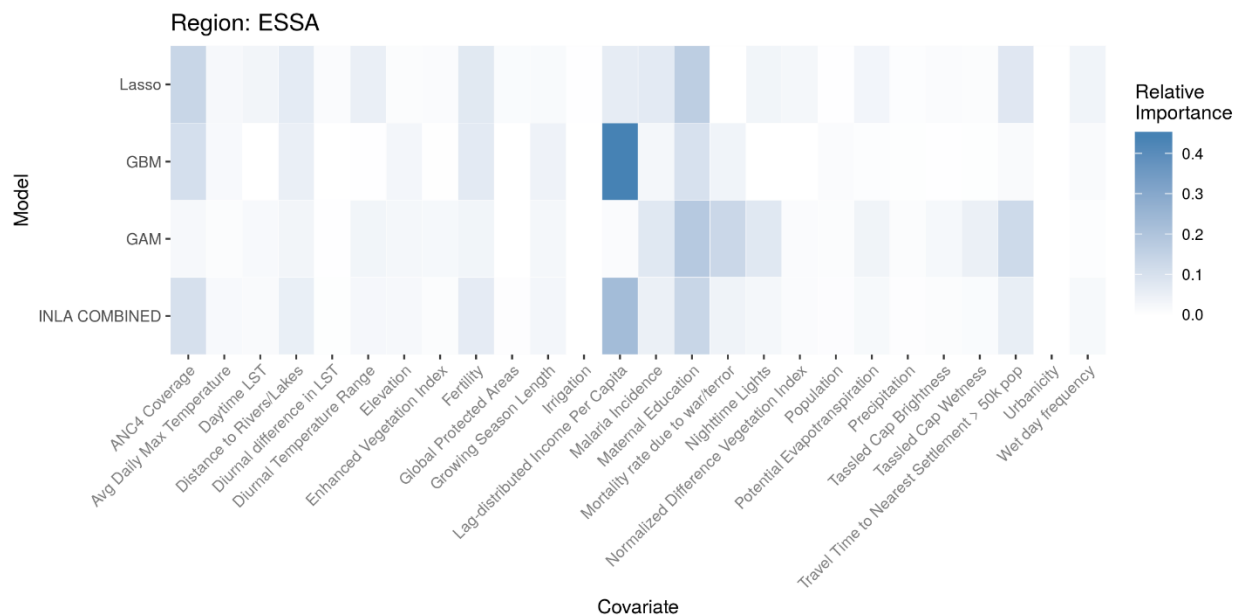

497  
 498

499

### C) NAME modelling region

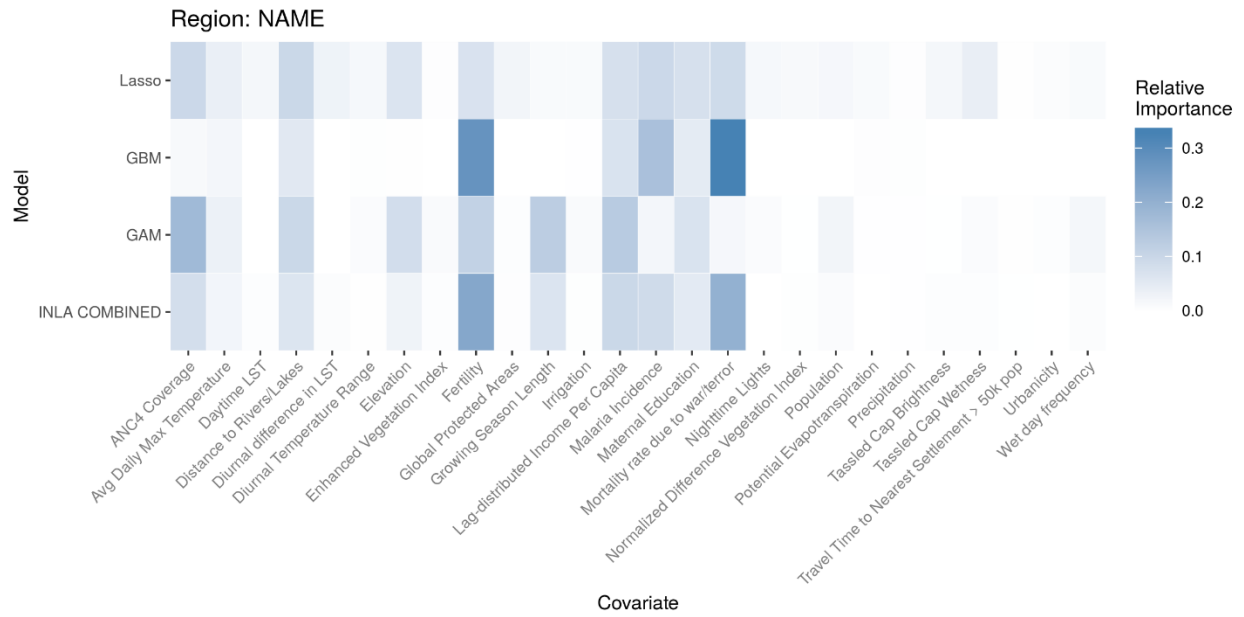

500

501

502

503

### D) SSSA modelling region

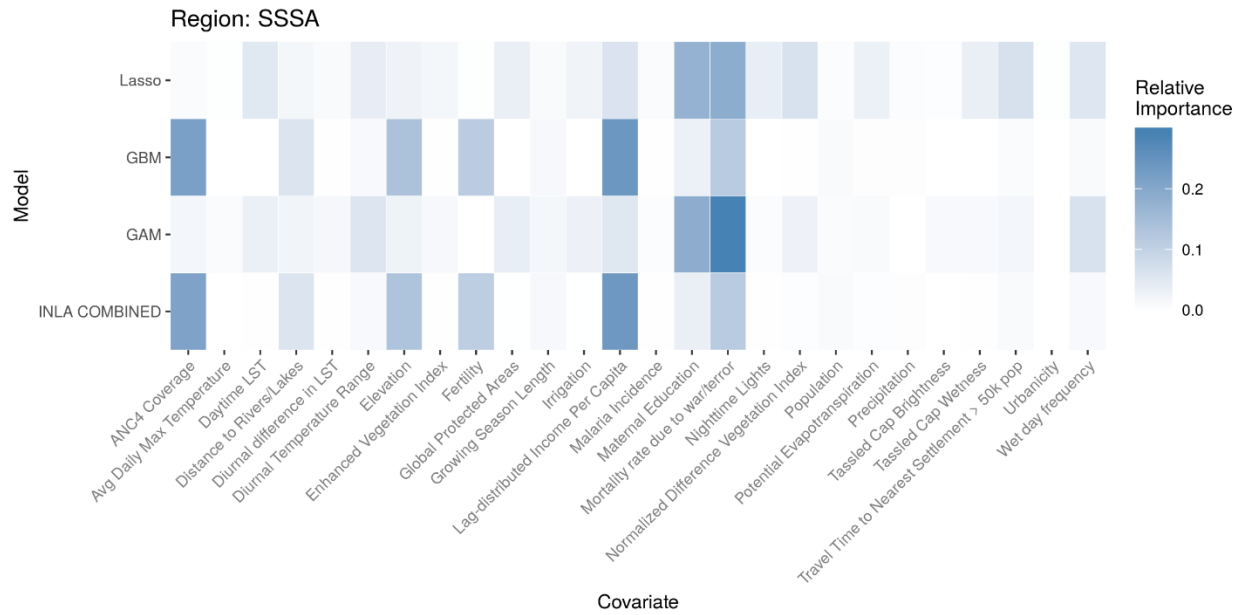

504

505

506

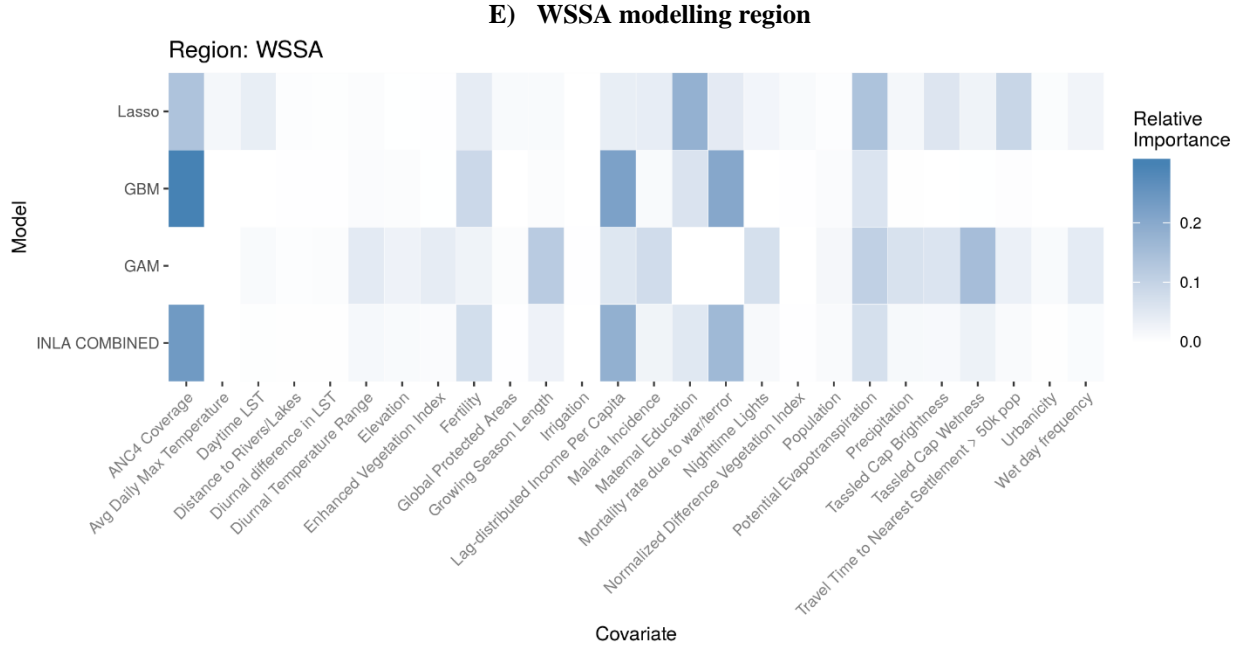

507

508

509

## 510 5.4 Geostatistical Model

511

### 512 5.4.1 Model description

513

514 Vaccine coverage was modelled as binomial count data with a logit link function using a Bayesian geostatistical  
 515 modelling framework consisting of a hierarchical spatially- and temporally-explicit generalized linear regression  
 516 model. For each modelled vaccine coverage quantity, the prevalence of vaccination was fit for each of the five  
 517 modelling regions within Africa, defining the Bayesian model as follows:

518

$$519 C_i | p_i, N_i \sim \text{Binomial}(p_i, N_i)$$

520

$$521 \text{logit}(p_i) = \beta_0 + \mathbf{X}_i \boldsymbol{\beta} + \epsilon_{GP_i} + \epsilon_{ctry_i} + \epsilon_i$$

522

$$523 \boldsymbol{\Sigma} \boldsymbol{\beta} = \mathbf{1}$$

524

$$525 \epsilon_i \sim N(0, \sigma_{nu_g}^2)$$

526

$$527 \epsilon_{ctry} \sim N(0, \sigma_{ctry}^2)$$

528

$$529 \epsilon_{GP} | \boldsymbol{\Sigma}_{\text{space}}, \boldsymbol{\Sigma}_{\text{time}} \sim GP(0, \boldsymbol{\Sigma}_{\text{space}} \otimes \boldsymbol{\Sigma}_{\text{time}})$$

530

$$531 \boldsymbol{\Sigma}_{\text{space}} = \frac{2^{1-\nu}}{\tau \times \Gamma(\nu)} \times (\kappa \mathbf{D})^\nu \times K_\nu(\kappa \mathbf{D})$$

532

$$533 \boldsymbol{\Sigma}_{\text{time}} = \rho^{|t_k - t_j|} \text{ for } time_j, time_k \in \{2000, 2005.33, 2010.66, 2016\}$$

534

535 This geostatistical model has been detailed in previous work<sup>5-7</sup>. Briefly, this framework models the number of  
 536 children in cluster  $i$  with sample size  $N_i$  who have been vaccinated with a given number of doses of the vaccine of



537 interest as binomial count data,  $C_i$ . The probabilities  $p_i$  represent the annual prevalence of vaccination among  
 538 children aged 12-23 months with the specified number of doses of vaccine at given location in space and time  
 539 (vaccine coverage). For simplicity, notation has been suppressed, but counts  $C_i$ , probabilities  $p_i$ , predictions from  
 540 the three submodels  $\mathbf{X}_i$ , and residual terms  $\epsilon_*$  are all specific to a particular location in space and time across the  
 541 modelled region and all years in the modelled time range.

542

543 Using a generalized linear model approach, the logit of annual prevalence,  $p_i$ , of vaccination was modelled as a  
 544 linear combination of:

545

- 546 •  $\mathbf{X}_i$ , the logit of the out-of-sample predictions of vaccine coverage obtained from three sub-models (GAM,  
 547 BRT, and lasso) generated from ensemble covariate modelling as described above in section 5.3  
 548 (Covariate ensemble modelling using stacked generalization),
- 549 •  $\epsilon_{GP_i}$ , a correlated spatiotemporal error term,
- 550 •  $\epsilon_{ctry_i}$ , a country-level random effect, and
- 551 •  $\epsilon_i$ , an independent nugget effect.

552

553 The coefficients  $\boldsymbol{\beta}$  on the sub-models in this generalized linear modelling framework represent their predictive  
 554 weighting and were constrained to sum to 1. The nugget  $\epsilon_i$  represents irreducible error for a given observation,  
 555 which could arise from measurement error or true variation beyond what is captured by the model. The joint error  
 556 term  $\epsilon_{GP}$ , then, represents the residual spatial and temporal autocorrelation that remains after accounting for the  
 557 predictive capacity of the ensemble-modelled covariates, country-specific variation in vaccine coverage, and  
 558 observation-specific irreducible error.

559

560 These spatiotemporal residuals  $\epsilon_{GP}$  were modelled as a three-dimensional spatiotemporal Gaussian process with a  
 561 mean of zero and a covariance matrix constructed from the Kronecker product of spatial and temporal covariance  
 562 kernels. Temporal covariance  $\Sigma_{\text{time}}$  was modelled using an autoregressive order 1 (AR1) function taken over three  
 563 equal-length periods spanning 2000-2016. Spatial covariance  $\Sigma_{\text{space}}$  was modelled using a stationary and isotropic  
 564 Matérn function<sup>13</sup>, which is a function of  $\mathbf{D}$ , a distance matrix in space-time. The model was fit using integrated  
 565 nested Laplace approximations in R-INLA<sup>14,15</sup> with the stochastic partial differential equations (SPDE)..

566

#### 567 5.4.2 Priors

568

569 Priors used for all geostatistical models were defined as follows:

570

- 571 •  $\beta_0 \sim N(\mu = 0, \sigma^2 = 3^2)$ ,
- 572 •  $\boldsymbol{\beta} \sim^{iid} N(\mu = 0, \sigma^2 = 3^2)$ ,
- 573 •  $\log\left(\frac{1+\rho}{1-\rho}\right) \sim N(\mu = 0, \sigma^2 = 1/0.15)$ ,
- 574 •  $\log\left(\frac{1}{\sigma_{nug}^2}\right) \sim \text{loggamma}(\alpha = 1, \gamma = 2)$ ,
- 575 •  $\log\left(\frac{1}{\sigma_{ctry}^2}\right) \sim \text{loggamma}(\alpha = 1, \gamma = 2)$ ,
- 576 •  $\theta_1 = \log(\tau) \sim N(\mu_{\theta_1}, \sigma_{\theta_1}^2)$
- 577 •  $\theta_2 = \log(\kappa) \sim N(\mu_{\theta_2}, \sigma_{\theta_2}^2)$ .

578

579 R-INLA automatically determines uncorrelated multivariate normal priors based on the finite elements mesh for the  
 580 log-transformed hyperparameters  $\kappa$  and  $\tau$  for the Matérn function used to model spatial covariance. The mean and  
 581 variance for these hyperpriors are given in Supplementary Table 5.

582

#### 583 **Supplementary Table 5: Spatial hyperparameter priors selected by R-INLA, by region**

584

| Region                      | $\mu_{\theta_1}$ | $\sigma_{\theta_1}^2$ | $\mu_{\theta_2}$ | $\sigma_{\theta_2}^2$ |
|-----------------------------|------------------|-----------------------|------------------|-----------------------|
| Central sub-Saharan Africa  | -0.231           | 10                    | -1.035           | 10                    |
| Eastern sub-Saharan Africa  | 0.104            | 10                    | -1.370           | 10                    |
| Northern Africa             | 0.220            | 10                    | -1.486           | 10                    |
| Southern sub-Saharan Africa | -0.174           | 10                    | -1.092           | 10                    |
| Western sub-Saharan Africa  | 0.182            | 10                    | -1.448           | 10                    |

585

### 586 5.4.3 Spatial mesh construction

587

588 In this modelling framework, the stochastic partial differentiation equation (SPDE) approximation to the Gaussian  
 589 process residuals for fitting of the spatiotemporal correlated error term in the generalized linear modelling  
 590 framework requires the construction of a finite elements mesh for each modelled region.<sup>17</sup> Finite elements meshes  
 591 were constructed using edge-smoothed polygon boundaries for each modelled region with the inner mesh triangle  
 592 maximum edge length set to 0.2 degrees and the buffer triangle maximum edge length set to be 5.0 degrees.

593 Supplementary Figure 10 provides an example of a finite element mesh for a modelling region.

594

#### 595 **Supplementary Figure 10: Example finite elements mesh.**

596 This figure shows the finite elements mesh used to fit the spatiotemporal correlated error term for Western sub-  
 597 Saharan Africa. The larger triangles show the buffer region surrounding the modelling region (maximum triangle  
 598 edge length of 5.0 degrees, while the finer inner mesh overlays the modelling region (maximum triangle edge length  
 599 of 0.2 degrees). Country boundaries are shown in red, and the simplified polygon used to define the modelling  
 600 region boundary is shown in blue.

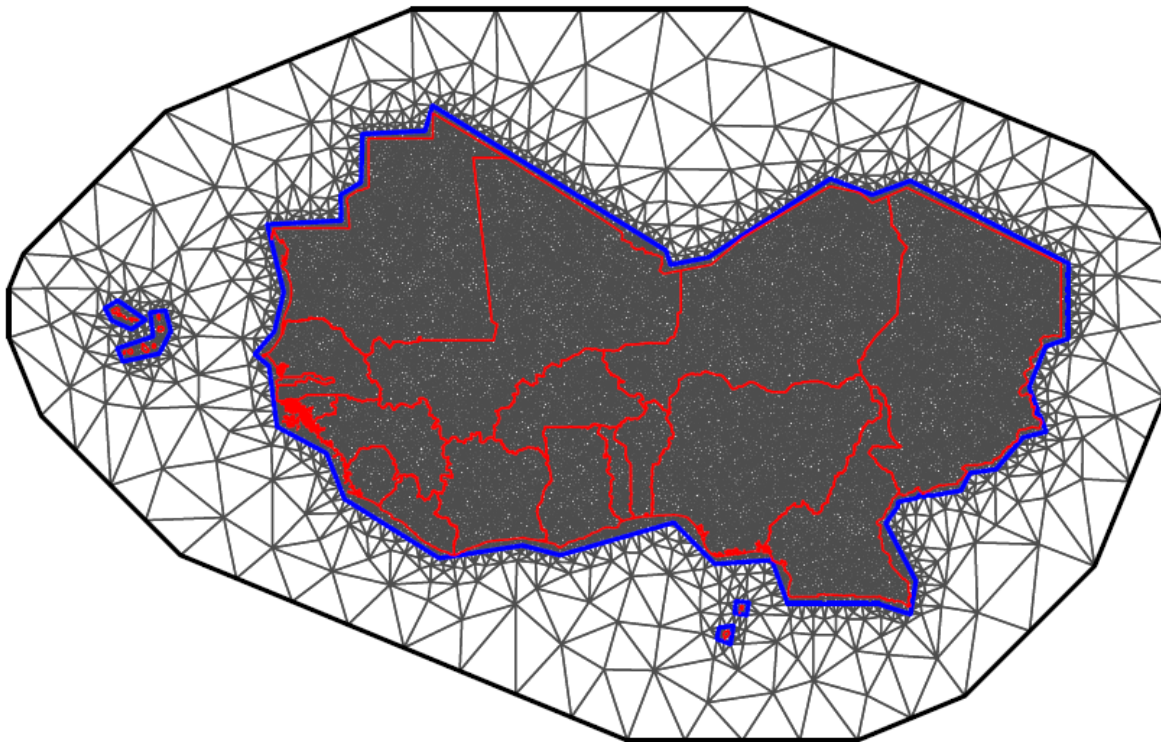

601

602

### 603 5.4.4 Model fitting and estimate generation

604

605 All models were fit in R-INLA using previously-published methods used for the estimation of under-5 mortality<sup>7</sup>,  
 606 education<sup>6</sup>, and child growth failure<sup>5</sup>. All cluster-level observations for which a precise latitude and longitude could

607 be obtained were assigned a weight of 1. For candidate observations generated using spatial resampling (as  
608 described in section 3.3, Geographic positioning of clusters and spatial integration of areal data), weights from the  
609 K-means clustering process were used during the INLA model fitting process. This process ensures that areal  
610 observations and precisely-located observations contribute equally to the log-likelihood within the model.

611  
612 Estimates of the fitted modelling parameters for each vaccine coverage geostatistical model, by region, can be found  
613 in Supplementary Table 6, Supplementary Table 7, and Supplementary Table 8. These parameters include fixed  
614 effects beta coefficients representing the relative contribution of each sub-model from the covariate ensemble  
615 modelling process as well as estimates of the fitted spatiotemporal field hyperparameters and the precision (inverse  
616 variance) for the nugget effect. For each hyperparameter, the median and associated 95% uncertainty intervals are  
617 provided. The spatial hyperparameters  $\tau$  and  $\kappa$  have been transformed into nominal variance and range for ease of  
618 interpretation. Nominal variance represents the variance at a single point (calculated as *nominal variance* =  
619  $4\pi\kappa^2\tau^2$ ). Nominal range approximates the distance that can be travelled from a point before spatial correlation  
620 decays by 90% (calculated as *range* =  $\sqrt{8}/\kappa$ )<sup>18</sup>.

#### 621 622 **5.4.5 Conditional ordinal regression modelling**

623  
624 DPT coverage in a given location can be conceptualized as a distribution of coverage – for each location, there are  
625 some children who have received 0 doses, 1 dose, 2 dose, or 3+ doses, and the relative distribution of children who  
626 fall into each category varies from location to location. In order to model the full distribution of possible vaccine  
627 coverage states, and thereby ensure that estimates of DPT1 coverage, DPT3 coverage, and dropout are internally  
628 consistent for every location and time in our models, a conditional ordinal regression framework<sup>19</sup> was used. This  
629 method estimates the probabilities of vaccination with 0, 1, 2, or 3+ doses of DPT for each modelled 5x5 km  
630 location in each year, by estimating coverage with 3+ doses (DPT3 coverage) and two conditional coverage  
631 quantities, as detailed below. Separate geospatial models (including both the covariate ensemble modelling process  
632 and the fitting of the hierarchical Bayesian geostatistical model) as described above were fit for DPT3 coverage and  
633 two additional conditional vaccine coverage metrics (where  $d$  is the number of doses received for each child):  
634

|                                 |                          |
|---------------------------------|--------------------------|
| A) DPT3 coverage:               | $p(d \geq 3)$            |
| B) 2-dose conditional coverage: | $p(d = 2 \mid d \leq 2)$ |
| C) 1-dose conditional coverage: | $p(d = 1 \mid d \leq 1)$ |

635  
636 The one- and two-dose conditional coverage geostatistical models therefore estimate conditional probability of  
637 having received exactly  $d$  doses given the receipt of  $d$  or fewer doses. Conditional coverage for  $d$  doses was  
638 calculated using a subset of the source data used to model DTP3 coverage, but limiting to clusters containing only  
639 individuals who had received  $d$  or fewer doses.

640  
641 For each of these three geospatial models, identical covariates, priors, and model configuration parameters were  
642 used to generate estimates of vaccine coverage by region as detailed above. From the posterior-estimated  
643 distributions of all modelled parameters, 1,000 draws (samples) were obtained, where each draw represents a  
644 potential set of vaccine coverage values for each 5x5 km location for each year in the modelled time range.

645  
646 From these three quantities (DPT3 coverage and 2- and 1-dose conditional coverage), and using the relationship that  
647  $p(d = 0) + p(d = 1) + p(d = 2) + p(d \geq 3) = 1$ , coverage with any number of doses can be calculated  
648 arithmetically. The outputs of these three related models were therefore used to arithmetically calculate separate  
649 geospatial estimates of the probability of receipt of 0, 1, 2, and  $\geq 3$  doses of DPT vaccine for each of the 1,000  
650 draws.

651 Supplementary Figure 11 visualizes these probabilities for a single 5x5 km area and year using a ternary plot. The  
652 overall result of this process is to generate 1,000 possible *distributions* of coverage for each 5x5 km area and year in  
653 the modelled region.

654

655 From these dose-specific coverage estimates, then, the vaccine coverage metrics of interest were then calculated at  
656 the draw level: DPT1 coverage, or the probability of receipt of  $\geq 1$  dose of DPT vaccine; DPT3 coverage, or the  
657 probability of receipt of  $\geq 3$  doses of DPT vaccine, and relative and absolute DPT1-3 dropout.

658

659 This continuation ratio ordinal regression modelling framework ensures internal consistency of all estimates at the  
660 draw level – that is, for each draw and space-time location, the probabilities of receipt of 0, 1, 2, or  $\geq 3$  doses of DPT  
661 vaccine all sum to one. Other ordinal regression approaches were considered, but the continuation ratio model was  
662 chosen as it directly estimates DPT3 coverage, which is the primary metric of interest in this study due to its  
663 longstanding role as a key metric of vaccine coverage used to guide policy decisions. Compared to other options for  
664 ordinal regression, such as a proportional odds model, a continuation ratio model allows for flexibility in the  
665 relationships between covariates and the odds of vaccination with 0, 1, 2, or  $\geq 3$  doses of DPT. As Supplemental  
666 Tables 6-8 and Supplementary Figure 16 demonstrate, the covariate-coverage relationships vary between the  
667 geospatial models, further supporting the choice of the continuation ratio method.

668

669 The resultant distributions of the metrics of interest (DPT1, DPT3, and dropout) were summarized as means and  
670 95% uncertainty intervals. As the range of mean vaccine coverage varies broadly across Africa, comparisons of  
671 uncertainty are challenging. The Coffey-Feingold-Bromberg metric, which provides a normalized measure of  
672 uncertainty for a set of proportions<sup>20</sup> was therefore used to assess draw-level uncertainty (Supplementary Figures 12-  
673 15).

674

675

676 **Supplementary Figure 11: Ternary plot of estimates of the distribution of vaccination at a single 5x5**  
677 **km pixel, by draw**

678 Left: a guide to interpretation of the ternary plot. For the purposes of the ternary plot, incomplete vaccination  
679 (having received 1 or 2 doses) of vaccine are grouped together. Each triangle edge functions as an axis representing  
680 the proportion of children in the particular year and 5x5 km location who have received 0 doses (upper-left axis), 1  
681 or 2 doses (upper-right axis), or 3 doses (bottom axis). The location of the point in ternary space can be interpreted  
682 by drawing lines to the appropriate axes following the triangular grid – in the example to the left, 20% of children  
683 received 0 doses of vaccine, 70% received 1 or 2 doses, and 10% received 3 (or more) doses. Right: a sample  
684 ternary plot from a randomly sampled pixel. Each point represents a single draw; the concentric lines in blue  
685 represent 50%, 90%, and 95% uncertainty intervals (from inner to outer).

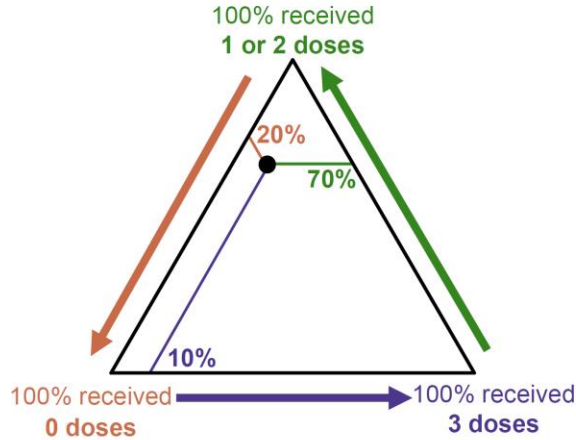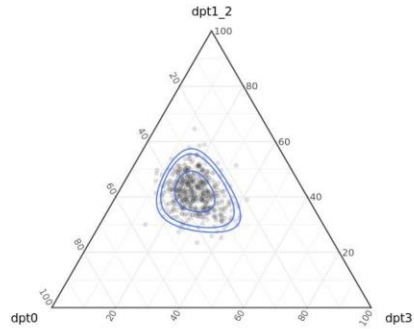

686  
687

688 **Supplementary Figure 12: Model uncertainty for DPT3 coverage, 2000 – 2016.**  
689 Model uncertainty for DPT3 coverage at the 5x5 km level in 2000 (a), 2010 (b), and 2016 (c) and at the second administrative level for 2000 (d), 2010 (e), and  
690 2016 (f). Model uncertainty is displayed using the Coffey-Feingold-Bromberg metric (CFB), a measure of uncertainty that is comparable regardless of mean  
691 coverage and scales from 0% (no uncertainty) to 100% (highest possible uncertainty for a given mean). Results are masked in grey where total population density  
692 was less than 10 individuals per 1 km pixel in 2015 per WorldPop<sup>1</sup> estimates, or where land cover was classified as “barren or sparsely vegetated” based on  
693 MODIS<sup>2</sup> satellite data in 2013.<sup>1</sup> estimates, or where land cover was classified as “barren or sparsely vegetated” based on MODIS satellite data in 2013.

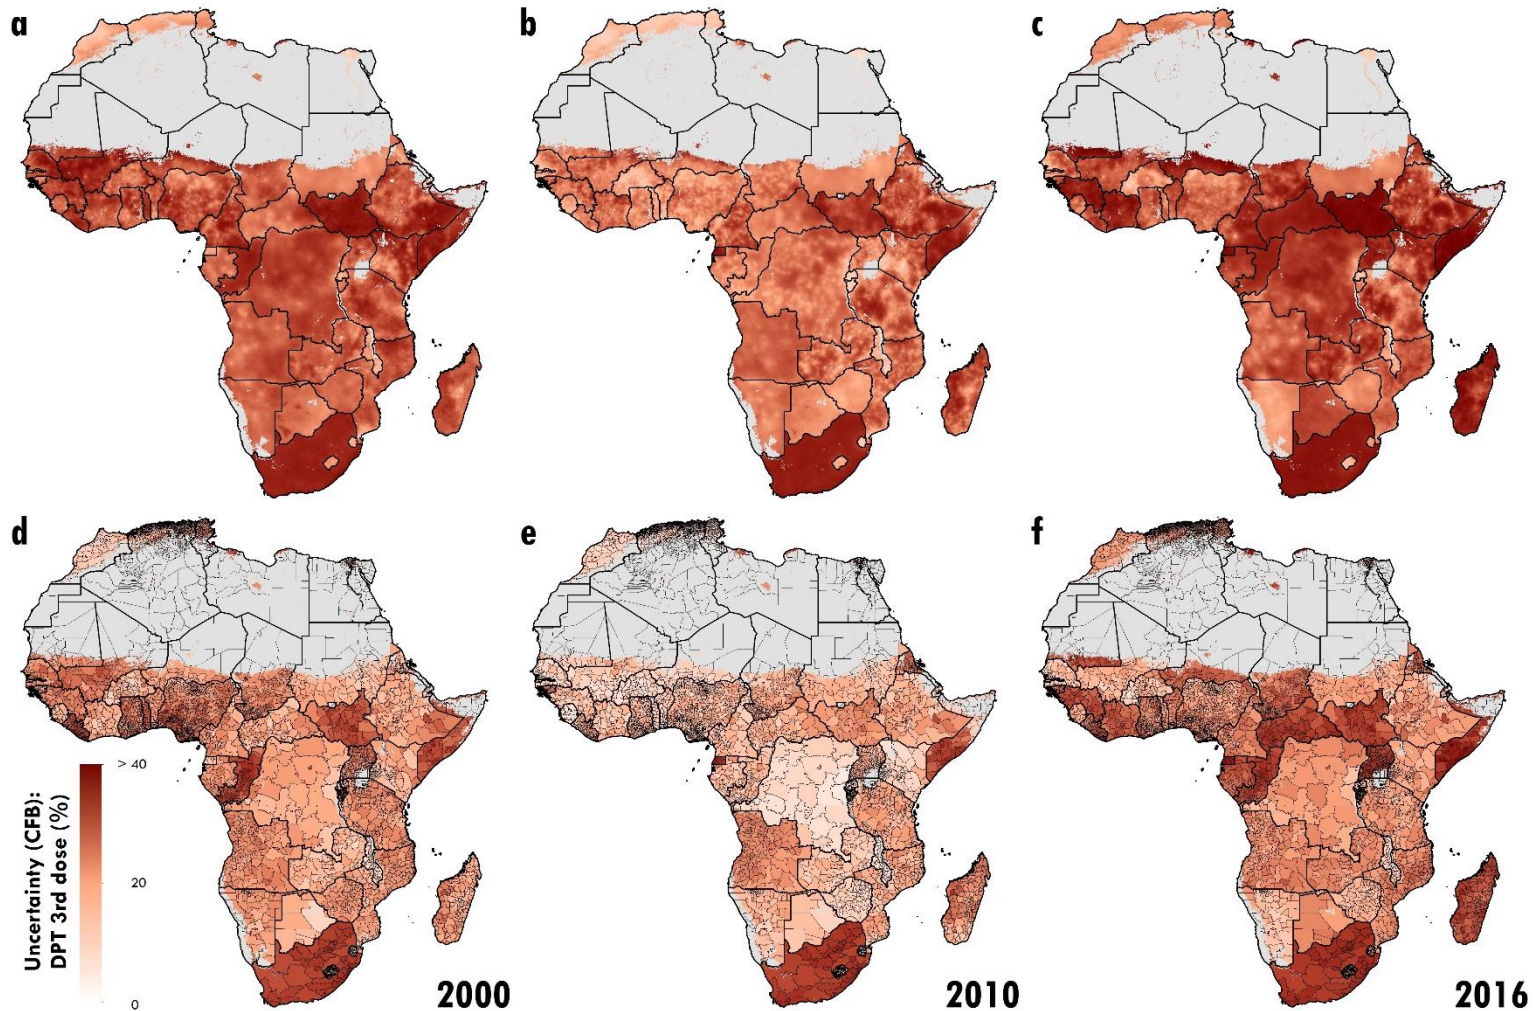

694

695 **Supplementary Figure 13: Model uncertainty for DPT1 coverage, 2000-2016**

696 Model uncertainty for DPT1 coverage at the 5x5 km level in 2000 (a), 2010 (b), and 2016 (c) and at the second administrative level for 2000 (d), 2010 (e), and  
697 2016 (f). Model uncertainty is displayed using the Coffey-Feingold-Bromberg metric (CFB), a measure of uncertainty that is comparable regardless of mean  
698 coverage and scales from 0% (no uncertainty) to 100% (highest possible uncertainty for a given mean). Results are masked in grey where total population density  
699 was less than 10 individuals per 1 km pixel in 2015 per WorldPop<sup>1</sup> estimates, or where land cover was classified as “barren or sparsely vegetated” based on  
700 MODIS<sup>2</sup> satellite data in 2013.<sup>1</sup> estimates, or where land cover was classified as “barren or sparsely vegetated” based on MODIS satellite data in 2013.

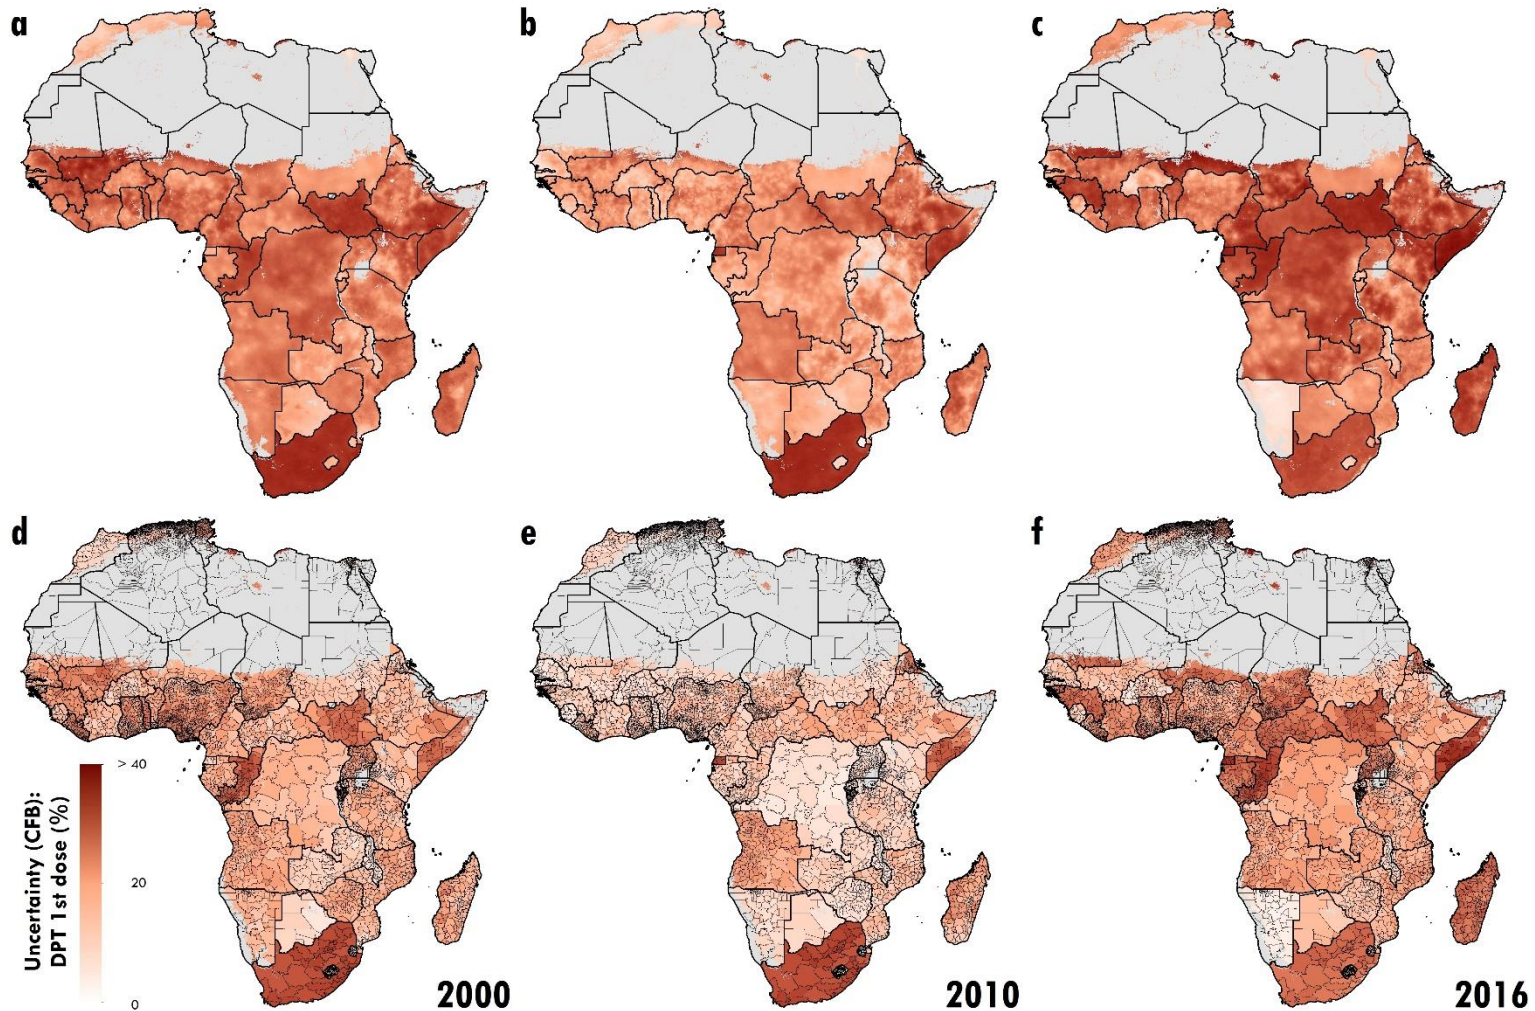

701

702 **Supplementary Figure 14: Model uncertainty for DPT1-3 absolute dropout, 2000-2016**  
703 Model uncertainty for DPT1-3 absolute dropout at the 5x5 km level in 2000 (a), 2010 (b), and 2016 (c) and at the second administrative level for 2000 (d), 2010 (e), and 2016 (f). Model uncertainty is displayed using the Coffey-Feingold-Bromberg metric (CFB), a measure of uncertainty that is comparable regardless of  
704 mean coverage and scales from 0% (no uncertainty) to 100% (highest possible uncertainty for a given mean). Results are masked in grey where total population  
705 density was less than 10 individuals per 1 km pixel in 2015 per WorldPop<sup>1</sup> estimates, or where land cover was classified as “barren or sparsely vegetated” based  
706 on MODIS<sup>2</sup> satellite data in 2013.<sup>1</sup> estimates, or where land cover was classified as “barren or sparsely vegetated” based on MODIS satellite data in 2013.  
707

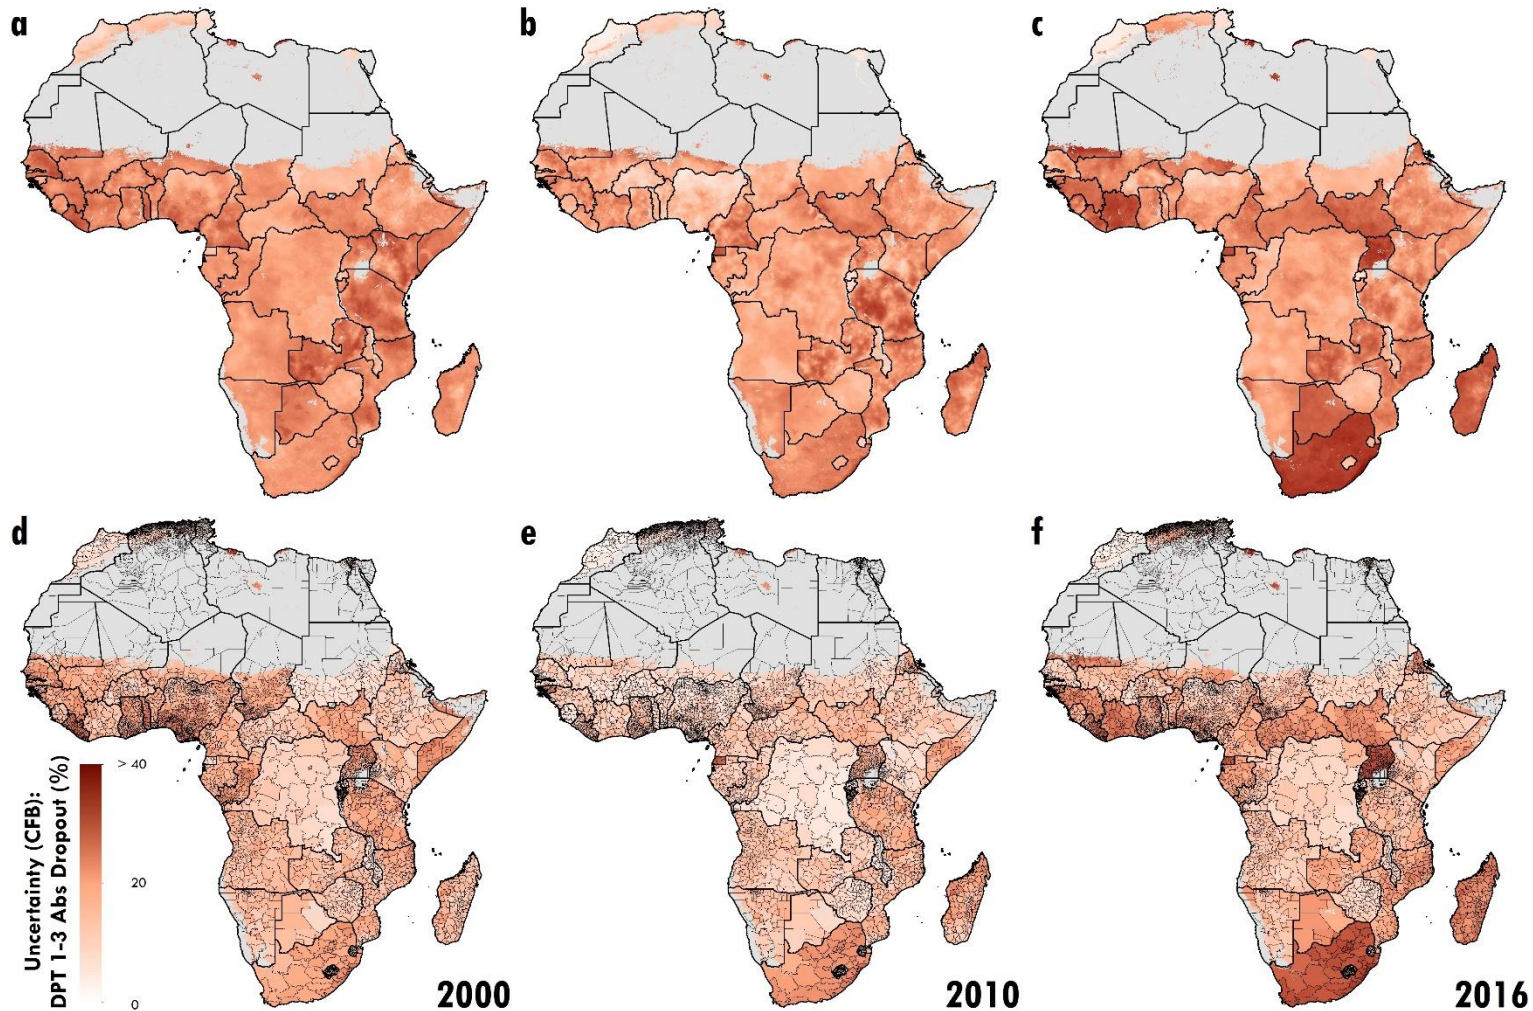

708



709 **Supplementary Figure 15: Comparison of uncertainty and coverage, 2016.**  
 710 Uncertainty for DPT3 coverage (a), DPT1 coverage (b), DPT1-DPT3 relative dropout (c), and DPT1-DPT3 absolute  
 711 dropout (d) among 12-23 month old children at the 5x5 kilometre resolution in 2016. Each map includes a bivariate  
 712 colour scale with the relative magnitude of the relevant indicator on the vertical axis (grey to red) and the relative  
 713 magnitude of uncertainty as measured by the Coffey-Feingold-Bromberg metric. Results are masked in grey where  
 714 total population density was less than 10 individuals per 1 km pixel in 2015 per WorldPop<sup>1</sup> estimates, or where land  
 715 cover was classified as “barren or sparsely vegetated” based on MODIS<sup>2</sup> satellite data in 2013.  
 716

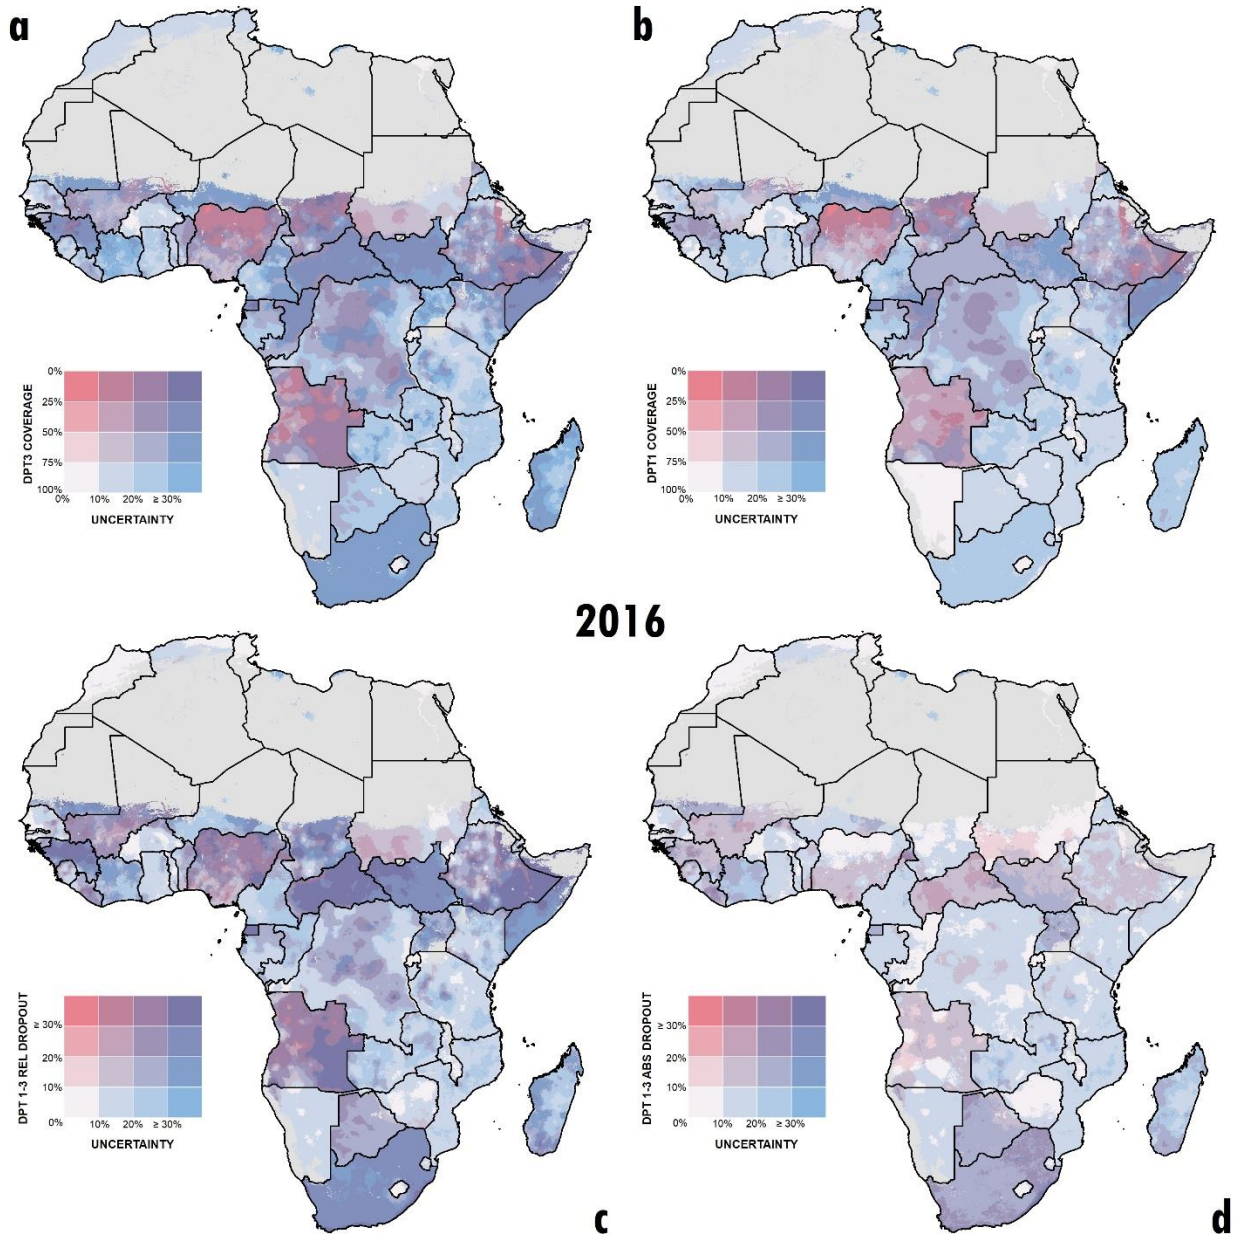

717

718  
 719  
 720  
 721  
 722

**Supplementary Table 6: Fitted geostatistical model parameters for DTP3 coverage**

GAM: Generalized additive model; GBM: gradient boosted model (the specific implementation of boosted regression trees used here); AR1: autoregressive order 1 function.

|                                    | Central sub-Saharan Africa quantiles |       |       | Eastern sub-Saharan Africa quantiles |       |       | Northern Africa quantiles |       |       | Southern sub-Saharan Africa quantiles |       |       | Western sub-Saharan Africa quantiles |       |       |
|------------------------------------|--------------------------------------|-------|-------|--------------------------------------|-------|-------|---------------------------|-------|-------|---------------------------------------|-------|-------|--------------------------------------|-------|-------|
|                                    | 0.025                                | 0.500 | 0.975 | 0.025                                | 0.500 | 0.975 | 0.025                     | 0.500 | 0.975 | 0.025                                 | 0.500 | 0.975 | 0.025                                | 0.500 | 0.975 |
| <b>GAM <math>\beta</math></b>      | 0.00                                 | 0.12  | 0.25  | 0.05                                 | 0.15  | 0.25  | 0.42                      | 0.56  | 0.71  | -0.20                                 | -0.01 | 0.17  | 0.10                                 | 0.17  | 0.23  |
| <b>GBM <math>\beta</math></b>      | 0.57                                 | 0.64  | 0.72  | 0.41                                 | 0.49  | 0.56  | 0.63                      | 0.75  | 0.88  | 0.84                                  | 0.96  | 1.08  | 0.76                                 | 0.82  | 0.87  |
| <b>Lasso <math>\beta</math></b>    | 0.10                                 | 0.23  | 0.37  | 0.24                                 | 0.36  | 0.48  | -0.48                     | -0.32 | -0.15 | -0.16                                 | 0.05  | 0.26  | -0.06                                | 0.02  | 0.09  |
| <b>Nominal Range</b>               | 1.87                                 | 2.19  | 2.50  | 1.20                                 | 1.30  | 1.41  | 2.71                      | 3.75  | 5.04  | 1.44                                  | 1.89  | 2.49  | 1.08                                 | 1.17  | 1.28  |
| <b>Nominal Variance</b>            | 0.52                                 | 0.62  | 0.73  | 0.84                                 | 0.91  | 0.97  | 0.25                      | 0.37  | 0.52  | 0.26                                  | 0.34  | 0.46  | 0.80                                 | 0.86  | 0.92  |
| <b>AR1 <math>\rho</math></b>       | 0.16                                 | 0.36  | 0.47  | 0.47                                 | 0.57  | 0.73  | 0.10                      | 0.34  | 0.56  | 0.13                                  | 0.34  | 0.53  | 0.18                                 | 0.23  | 0.28  |
| <b>Precision for nugget effect</b> | 34.40                                | 42.00 | 52.02 | 26.45                                | 32.63 | 43.84 | 25.56                     | 32.76 | 41.79 | 15.32                                 | 20.95 | 28.22 | 24.41                                | 30.72 | 40.29 |

723  
 724  
 725

726 **Supplementary Table 7: Fitted geostatistical model parameters for the 2-dose conditional coverage model**

727 The modelled quantity represents the probability of having received exactly 2 doses among those who have received 2 or fewer doses. GAM: Generalized  
 728 additive model; GBM: gradient boosted model (the specific implementation of boosted regression trees used here); AR1: autoregressive order 1 function.

729  
 730

|                                        | Central sub-Saharan Africa<br>quantiles |       |       | Eastern sub-Saharan Africa<br>quantiles |       |       | Northern Africa quantiles |       |       | Southern sub-Saharan<br>Africa quantiles |       |       | Western sub-Saharan Africa<br>quantiles |       |       |
|----------------------------------------|-----------------------------------------|-------|-------|-----------------------------------------|-------|-------|---------------------------|-------|-------|------------------------------------------|-------|-------|-----------------------------------------|-------|-------|
|                                        | 0.025                                   | 0.500 | 0.975 | 0.025                                   | 0.500 | 0.975 | 0.025                     | 0.500 | 0.975 | 0.025                                    | 0.500 | 0.975 | 0.025                                   | 0.500 | 0.975 |
| <b>GAM <math>\beta</math></b>          | -0.22                                   | -0.09 | 0.03  | -0.36                                   | -0.20 | -0.04 | -0.48                     | -0.19 | 0.09  | -0.23                                    | 0.05  | 0.32  | -0.29                                   | -0.16 | -0.04 |
| <b>GBM <math>\beta</math></b>          | 1.16                                    | 1.23  | 1.31  | 1.13                                    | 1.23  | 1.33  | 1.05                      | 1.25  | 1.46  | 0.75                                     | 0.95  | 1.14  | 1.14                                    | 1.21  | 1.29  |
| <b>Lasso <math>\beta</math></b>        | -0.26                                   | -0.14 | -0.01 | -0.19                                   | -0.03 | 0.13  | -0.32                     | -0.06 | 0.19  | -0.25                                    | 0.01  | 0.26  | -0.18                                   | -0.05 | 0.08  |
| <b>Nominal Range</b>                   | 1.55                                    | 1.99  | 2.59  | 1.36                                    | 1.66  | 1.99  | 1.39                      | 4.85  | 24.16 | 1.63                                     | 3.85  | 9.53  | 1.27                                    | 1.46  | 1.65  |
| <b>Nominal Variance</b>                | 0.10                                    | 0.14  | 0.18  | 0.22                                    | 0.26  | 0.31  | 0.00                      | 0.01  | 0.06  | 0.02                                     | 0.07  | 0.19  | 0.31                                    | 0.35  | 0.40  |
| <b>AR1 <math>\rho</math></b>           | 0.12                                    | 0.40  | 0.64  | 0.03                                    | 0.21  | 0.35  | -0.84                     | -0.18 | 0.64  | -0.76                                    | -0.23 | 0.53  | -0.06                                   | 0.05  | 0.15  |
| <b>Precision for nugget<br/>effect</b> | 28.52                                   | 35.76 | 45.60 | 23.37                                   | 31.04 | 39.54 | 16.23                     | 21.92 | 29.68 | 10.96                                    | 15.72 | 22.32 | 42.68                                   | 51.41 | 63.17 |

731  
 732

733 **Supplementary Table 8: Fitted geostatistical model parameters for the 1-dose conditional coverage model**

734 The modelled quantity represents the probability of having received exactly 1 dose among those who have received 1 or 0 doses. GAM: Generalized additive  
 735 model; GBM: gradient boosted model (the specific implementation of boosted regression trees used here); AR1: autoregressive order 1 function.

736

|                                        | Central sub-Saharan Africa<br>quantiles |       |       | Eastern sub-Saharan Africa<br>quantiles |       |       | Northern Africa quantiles |       |       | Southern sub-Saharan Africa<br>quantiles |       |       | Western sub-Saharan Africa<br>quantiles |       |       |
|----------------------------------------|-----------------------------------------|-------|-------|-----------------------------------------|-------|-------|---------------------------|-------|-------|------------------------------------------|-------|-------|-----------------------------------------|-------|-------|
|                                        | 0.025                                   | 0.500 | 0.975 | 0.025                                   | 0.500 | 0.975 | 0.025                     | 0.500 | 0.975 | 0.025                                    | 0.500 | 0.975 | 0.025                                   | 0.500 | 0.975 |
| <b>GAM <math>\beta</math></b>          | -0.10                                   | 0.00  | 0.11  | -0.21                                   | -0.05 | 0.07  | -0.19                     | -0.01 | 0.18  | -0.57                                    | -0.27 | 0.03  | -0.50                                   | -0.36 | -0.22 |
| <b>GBM <math>\beta</math></b>          | 1.07                                    | 1.14  | 1.22  | 1.10                                    | 1.19  | 1.28  | 1.12                      | 1.27  | 1.42  | 1.00                                     | 1.18  | 1.35  | 1.46                                    | 1.54  | 1.61  |
| <b>Lasso <math>\beta</math></b>        | -0.25                                   | -0.15 | -0.04 | -0.27                                   | -0.13 | 0.03  | -0.41                     | -0.26 | -0.12 | -0.18                                    | 0.09  | 0.36  | -0.32                                   | -0.18 | -0.04 |
| <b>Nominal Range</b>                   | 1.80                                    | 2.27  | 2.94  | 1.33                                    | 1.63  | 1.99  | -1.39                     | 0.38  | 46.51 | 0.46                                     | 2.94  | 23.97 | 1.24                                    | 1.48  | 1.68  |
| <b>Nominal Variance</b>                | 0.14                                    | 0.18  | 0.25  | 0.27                                    | 0.33  | 0.40  | 0.00                      | 0.00  | 0.00  | 0.00                                     | 0.01  | 0.09  | 0.34                                    | 0.40  | 0.46  |
| <b>AR1 <math>\rho</math></b>           | -0.23                                   | -0.01 | 0.22  | -0.15                                   | 0.01  | 0.16  | -0.99                     | -0.06 | 0.99  | -0.90                                    | -0.26 | 0.76  | -0.20                                   | -0.09 | 0.02  |
| <b>Precision for<br/>nugget effect</b> | 25.51                                   | 32.44 | 41.78 | 18.30                                   | 23.86 | 33.18 | 12.68                     | 17.68 | 24.92 | 8.04                                     | 11.89 | 18.22 | 32.62                                   | 40.30 | 50.59 |

737

738 **Supplementary Figure 16: Beta coefficients for ensemble sub-models.**

739 Estimates of the beta coefficients (median and 95% uncertainty interval) from the fitted geostatistical models (1-  
 740 dose conditional DPT coverage, 2-dose conditional DPT coverage, and DPT3 coverage) for each ensemble sub-  
 741 models: GAM (generalized additive model), GBM (gradient boosted model, the specific implementation of boosted  
 742 regression trees used here), and lasso regression. Coefficients are constrained to sum to one. In general, GBM  
 743 ensemble sub-models were the most influential across all modelled quantities and regions.

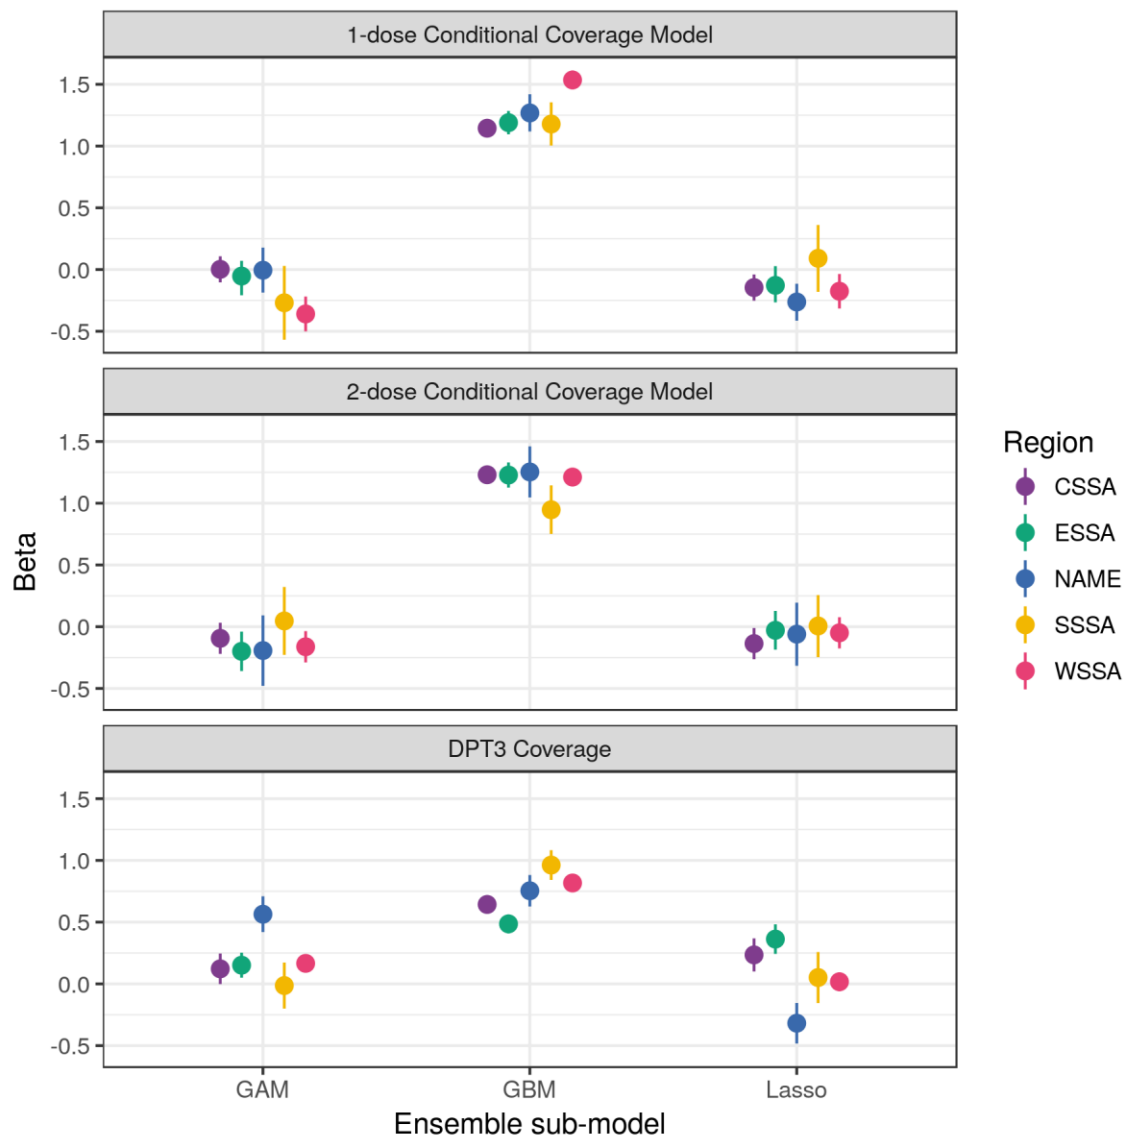

744

745

746 **5.5 Model validation**

747

748 **5.5.1 Metrics of predictive validity**

749

750 Spatially and temporally stratified five-fold out-of-sample cross-validation<sup>21</sup> was used to assess the predictive  
751 validity of estimated DPT3 coverage, DPT1 coverage, and DPT1-3 absolute dropout. Temporal folds were created  
752 by stratifying across years such that each fold contains approximately 1/5 of the data for each year. Spatial folds  
753 were created by allocating each second-level administrative unit in the modelling region to one of five folds  
754 (Supplementary Figure 17).

755

756 Each geostatistical model (DPT3 coverage and the one- and two-dose conditional coverage models) was run five  
757 times, holding out data from one of the spatiotemporal folds each time and generating a set of out-of-sample  
758 predictions from the held out data. These draw-level model outputs were then combined as described above in  
759 section 5.4.5 (Conditional ordinal regression modelling) to generate draw-level out-of-sample estimates of DPT3  
760 and DPT1 coverage as well as relative and absolute dropout. The spatiotemporal folds were generated using the full  
761 data set, then applied uniformly to each geostatistical model in the continuation ratio ordinal regression framework.  
762 This ensured that the same data were held out for all steps in the calculation of draw-level estimates of DPT3 and  
763 DPT1 coverage and dropout.

764

765 Using these out-of-sample estimates of DPT3 coverage, DPT1 coverage, and DPT1-3 absolute dropout, multiple  
766 out-of-sample metrics of predictive validity were calculated, including mean error (ME, or bias), mean absolute  
767 error (MAE), root-mean-squared error (RMSE, which summarizes the total variance), and 95% coverage of  
768 predictive intervals (the proportion of out-of-sample observations that fall within the 95% predictive credible  
769 intervals). Each predictive metric was calculated by first simulating predictive draws using a binomial distribution.  
770 The predictive metric of interest was then calculated as a sample-size-weighted mean over national, first and second  
771 administrative levels, using boundary definitions from the FAO Global Administrative Unit Layers (GAUL)<sup>3</sup>.  
772 These out-of-sample results are summarized in Supplementary Figures 18-21. In addition, scatter plots of out-of-  
773 sample predictions of coverage at the second administrative level compared to observed data can be found in  
774 Supplementary Figures 22-24.

775

776 Finally, in order to explore spatial and temporal patterns of error in our results, maps of in-sample residual absolute  
777 error (predictions vs observed data) over space and time were produced for 2000, 2005, 2010, and 2016  
778 (Supplementary Figures 25-27)

779

780

781 **Supplementary Figure 17: Visualization of spatial holdouts at the second administrative level**  
782 Each point represents a single observation as entered into the INLA geospatial model for a single year in the West  
783 Africa region, coloured by fold number with size proportional to sample size. Transparency is used to show the  
784 weights of candidate observations generated by the areal data resampling procedure.

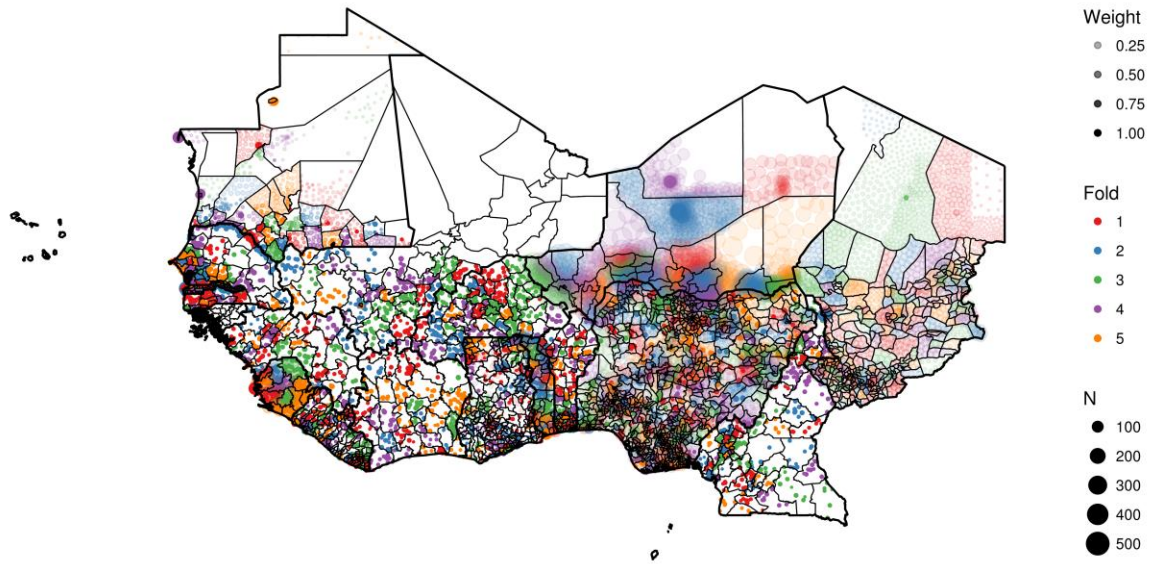

785  
786  
787

788 **Supplementary Figure 18: Out-of-sample 95% coverage of predictive intervals.**  
 789 Results are displayed for each modelled year as time series. Each panel represents level of aggregation (Country,  
 790 first-level administrative unit, second-level administrative unit). Line colours represent the modelled indicator.  
 791

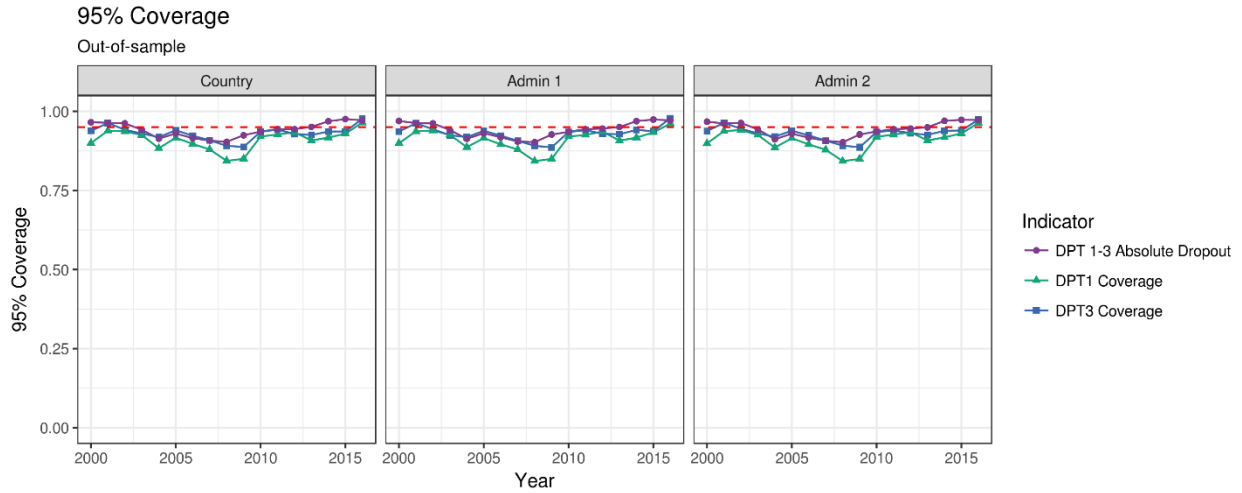

792  
 793  
 794 **Supplementary Figure 19: Out-of-sample mean absolute error.**  
 795 Results are displayed for each modelled year as time series. Each panel represents level of aggregation (Country,  
 796 first-level administrative unit, second-level administrative unit). Line colours represent the modelled indicator.

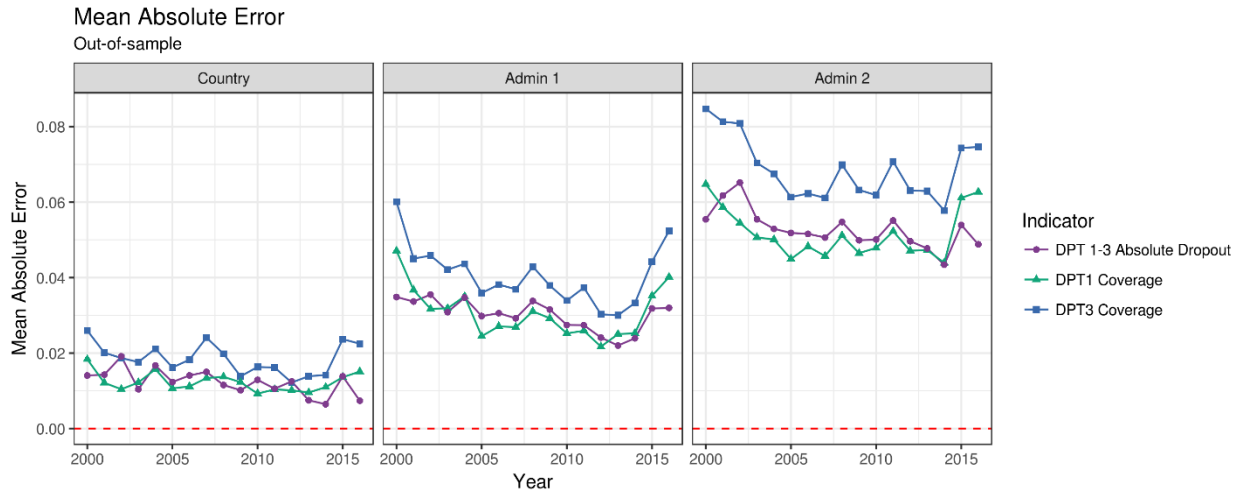

797  
 798



799 **Supplementary Figure 20: Out-of-sample mean error (bias).**  
 800 Results are displayed for each modelled year as time series. Each panel represents level of aggregation (Country,  
 801 first-level administrative unit, second-level administrative unit). Line colours represent the modelled indicator.  
 802

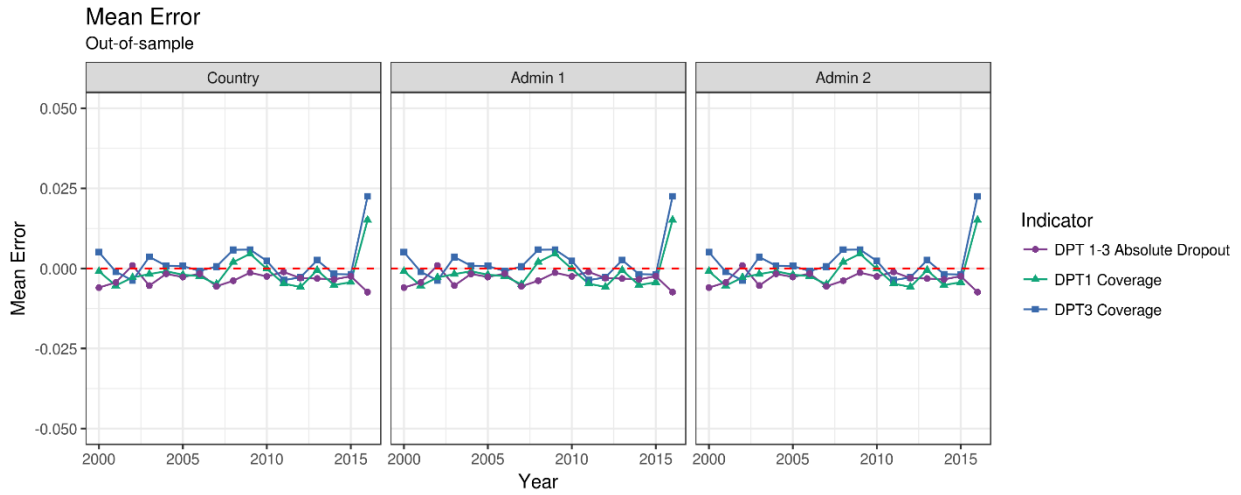

803  
 804  
 805 **Supplementary Figure 21: Out-of-sample RMSE.**  
 806 Results are displayed for each modelled year as time series. Each panel represents level of aggregation (Country,  
 807 first-level administrative unit, second-level administrative unit). Line colours represent the modelled indicator.  
 808

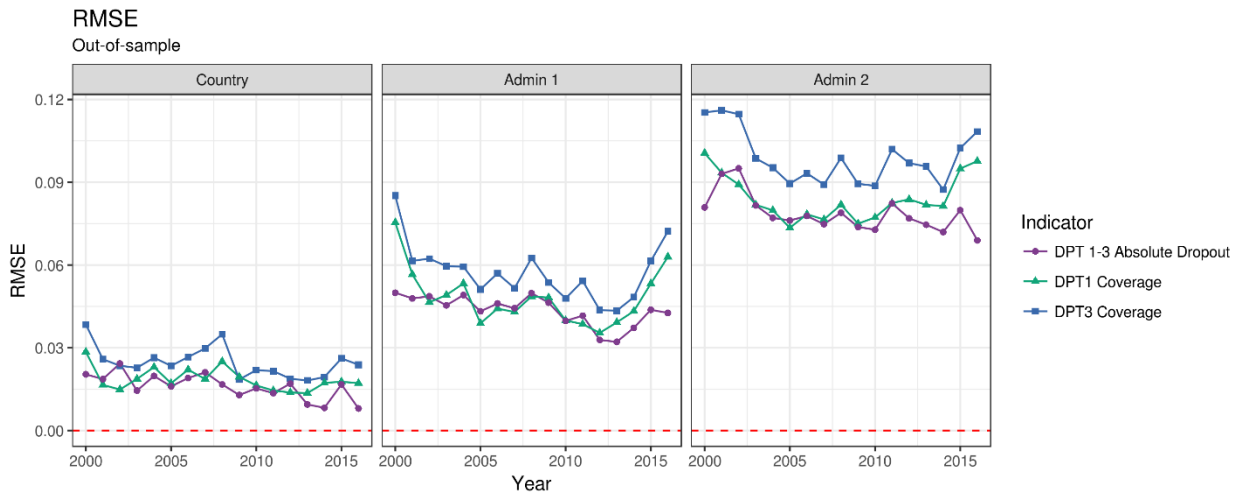

809  
 810  
 811

812 **Supplementary Figure 22: Out-of-sample predictions of DPT3 coverage vs. observed data at the**  
 813 **second administrative level**  
 814 Comparison of out-of-sample predictions of DPT3 coverage, aggregated to the second administrative level with 95%  
 815 predictive intervals, plotted against data observations from the same area aggregated to the second administrative  
 816 level. Out of sample predictions were generated from second-administrative-level spatiotemporal holdouts.  
 817

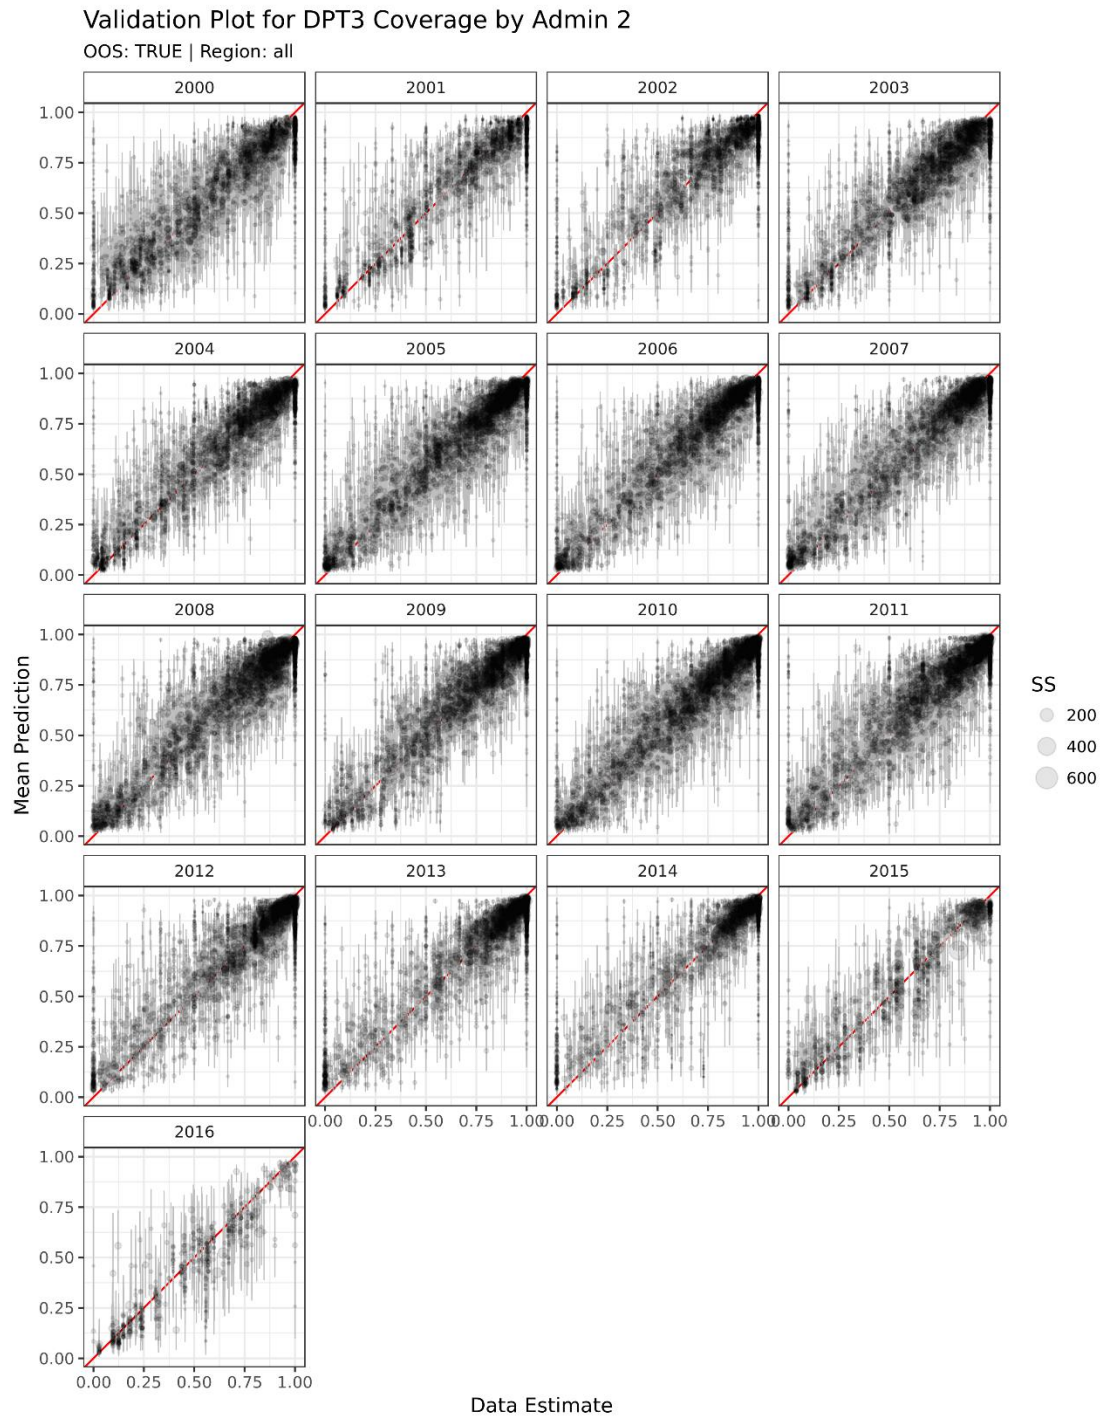

818

819  
820  
821  
822  
823  
824  
825

**Supplementary Figure 23: Out-of-sample predictions of DPT1 coverage vs. observed data at the second administrative level**

Comparison of out-of-sample predictions of DPT1 coverage, aggregated to the second administrative level with 95% predictive intervals, plotted against data observations from the same area aggregated to the second administrative level. Out of sample predictions were generated from second-administrative-level spatiotemporal holdouts.

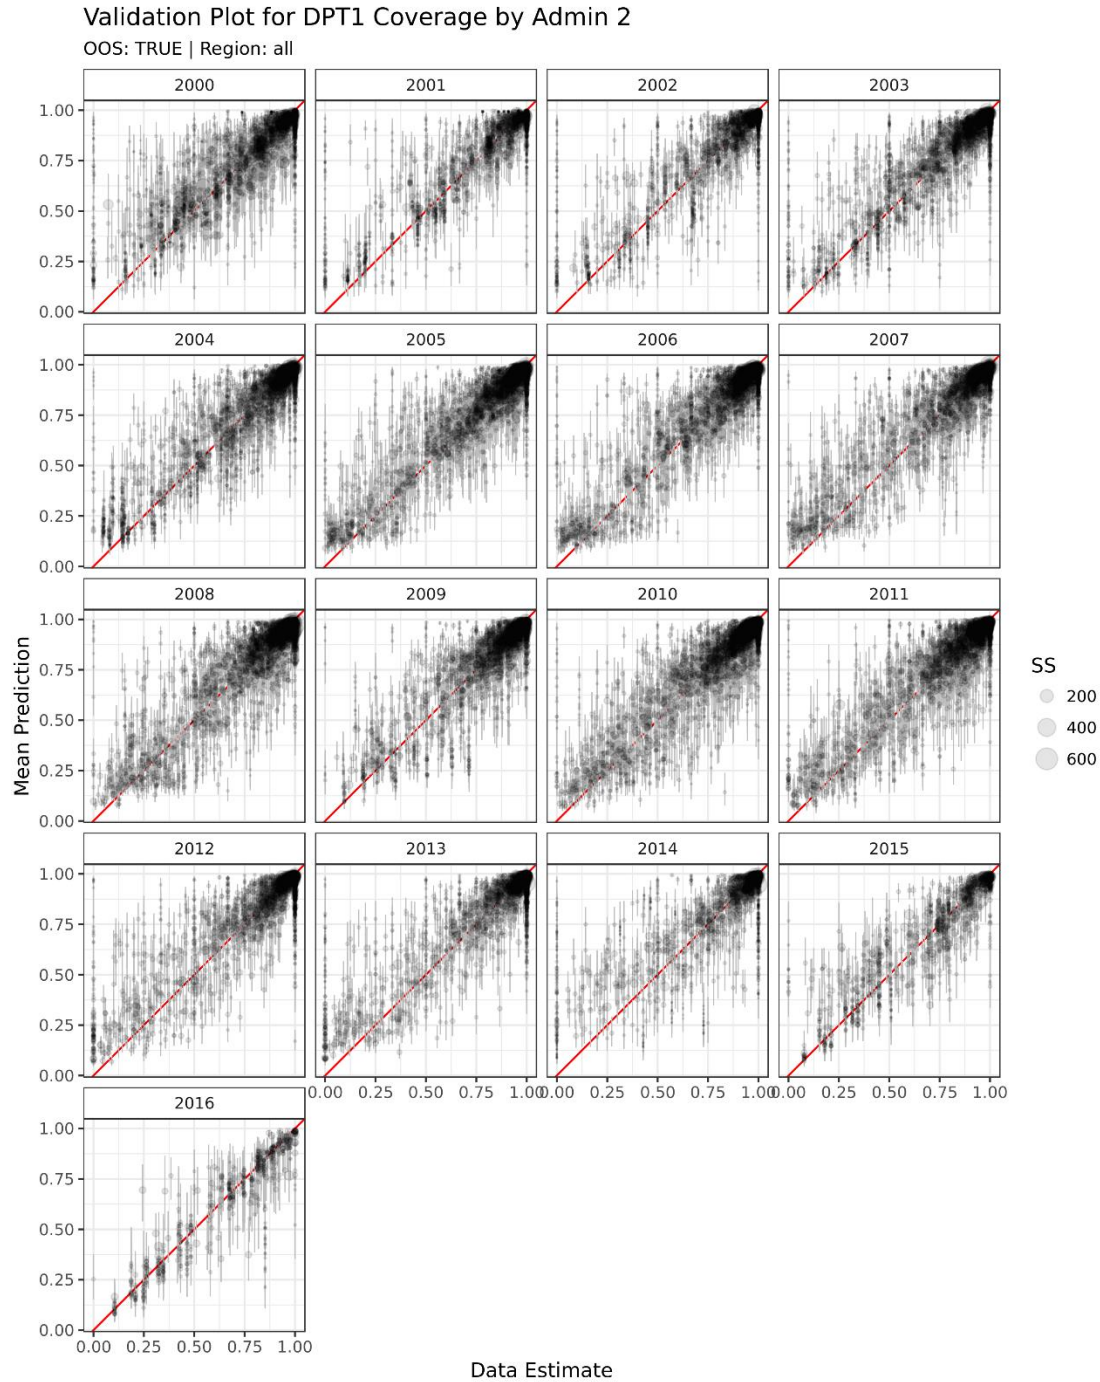

826

827 **Supplementary Figure 24: Out-of-sample predictions of DPT1-3 absolute dropout vs. observed data at**  
828 **the second administrative level**

829 Comparison of out-of-sample predictions of DPT1-3 absolute dropout, aggregated to the second administrative level  
830 with 95% predictive intervals, plotted against data observations from the same area aggregated to the second  
831 administrative level. Out of sample predictions were generated from second-administrative-level spatiotemporal  
832 holdouts.  
833

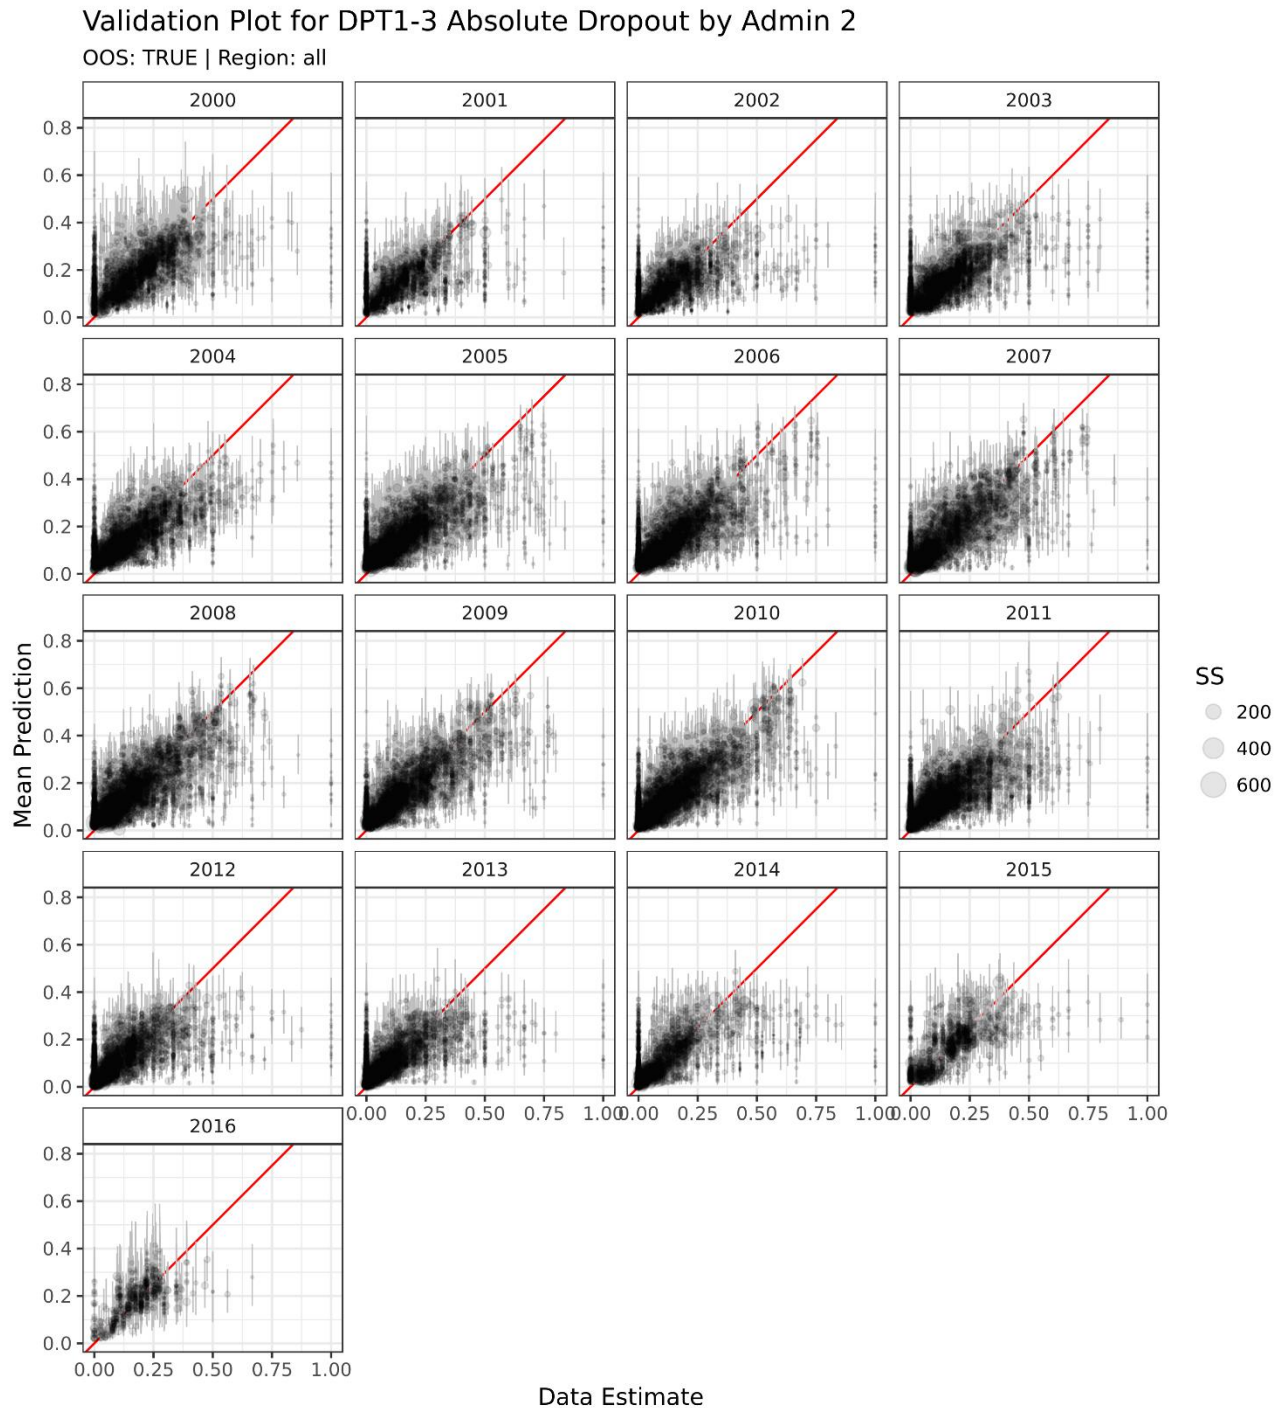

834

835 **Supplementary Figure 25: Residual error maps for DPT3 coverage**  
836 Maps of residual error for DPT3 coverage for four time periods: 2000-2003, 2004-2007, 2008-2011, 2012-2016.  
837 Each point represents a single observed coverage data observation entered into the geospatial model (both precisely  
838 geopositioned observations and candidate observations generated using the resampling procedure for areal data).  
839 The size of each point represents the sample size for the observation, colour represents residual error, and  
840 transparency represents the weight of the observation. Residual error is calculated as (predicted value – observed  
841 value).  
842

Residual error: DPT3 coverage

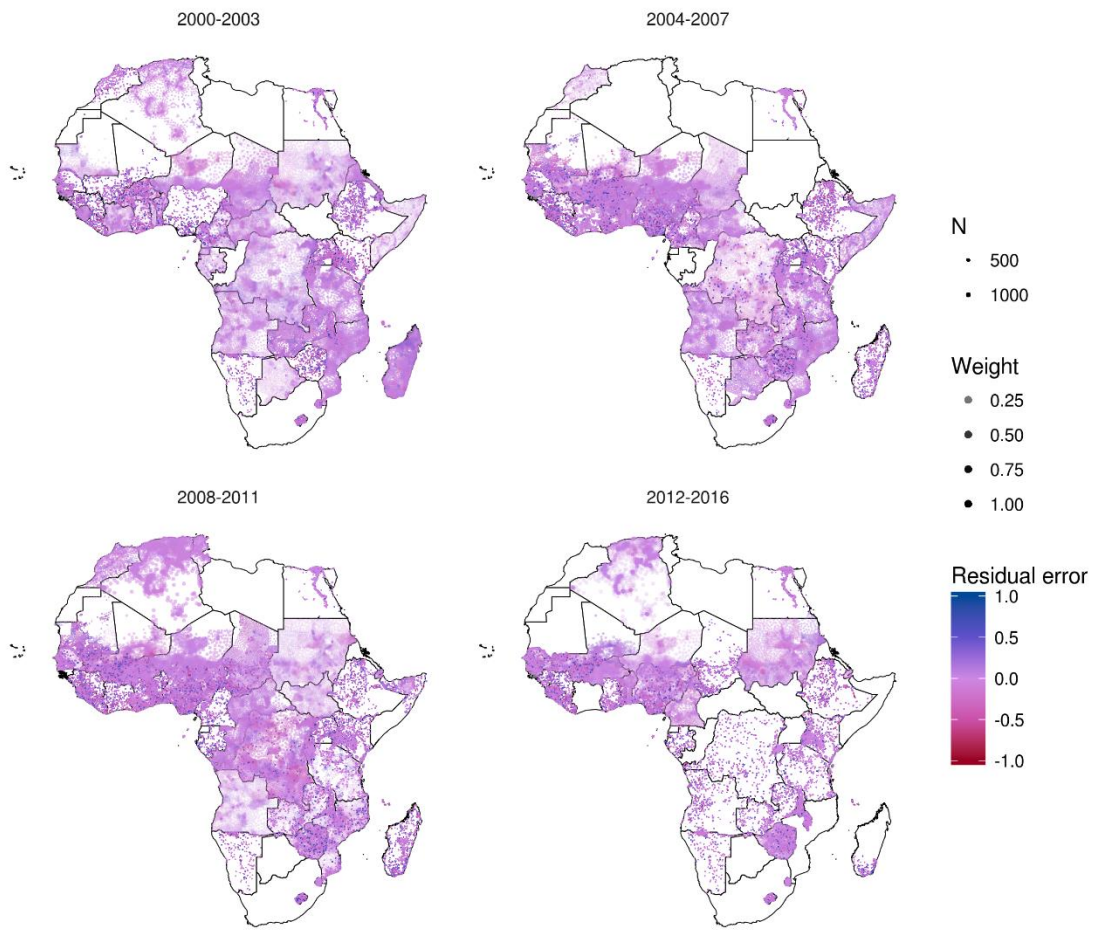

843  
844  
845

846 **Supplementary Figure 26: Residual error maps for DPT1 coverage**  
847 Maps of residual error for DPT1 coverage for four time periods: 2000-2003, 2004-2007, 2008-2011, 2012-2016.  
848 Each point represents a single observed coverage data observation entered into the geospatial model (both precisely  
849 geopositioned observations and candidate observations generated using the resampling procedure for areal data).  
850 The size of each point represents the sample size for the observation, colour represents residual error, and  
851 transparency represents the weight of the observation. Residual error is calculated as (predicted value – observed  
852 value).  
853

Residual error: DPT1 coverage

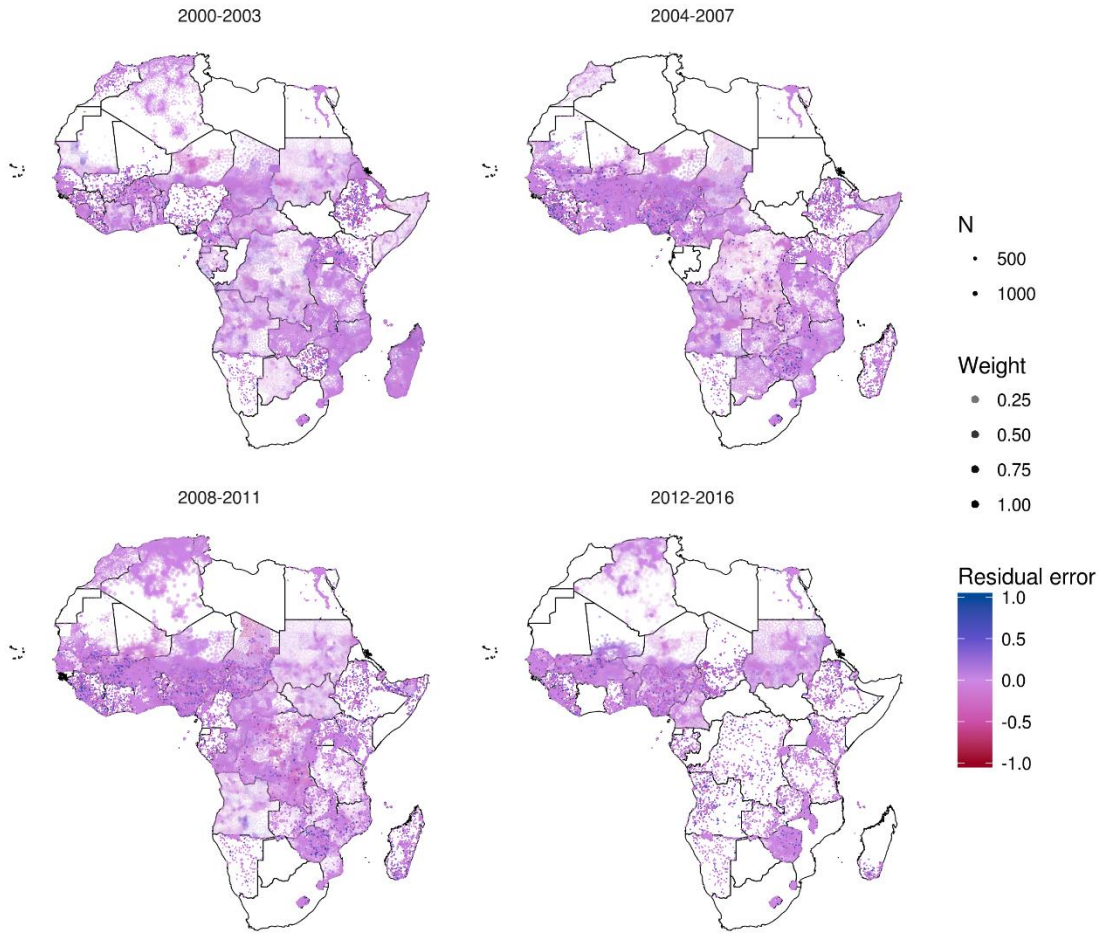

854  
855  
856

857 **Supplementary Figure 27: Residual error maps for DPT 1-3 absolute dropout**  
858 Maps of residual error for DPT 1-3 absolute dropout for four time periods: 2000-2003, 2004-2007, 2008-2011,  
859 2012-2016. Each point represents a single observed coverage data observation entered into the geospatial model  
860 (both precisely geopositioned observations and candidate observations generated using the resampling procedure for  
861 areal data). The size of each point represents the sample size for the observation, colour represents residual error,  
862 and transparency represents the weight of the observation. Residual error is calculated as (predicted value –  
863 observed value).  
864  
865

Residual error: DPT 1-3 absolute dropout

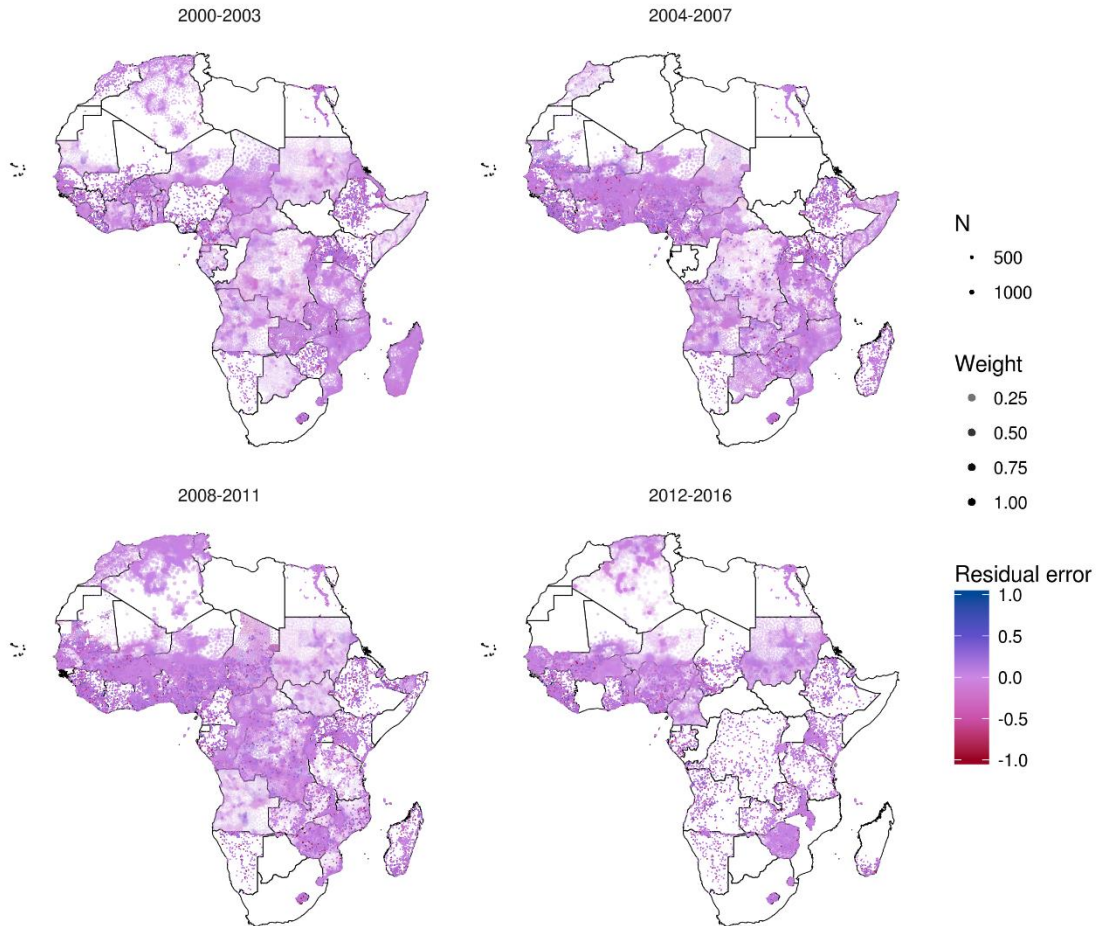

866  
867  
868  
869  
870

871 **5.5.2 Model comparisons**

872

873 To investigate the relative contributions of each component of the geostatistical modelling process, the above  
874 modelling process was repeated for five different combinations of covariates and spatiotemporal effects:

875

876 1) Raw covariates:

$$877 \text{logit}(p_i) = \beta_0 + X_i\beta_{\text{raw}} + \epsilon_{\text{ctry}_i} + \epsilon_i$$

878

879 2) Predictions from covariate ensemble modelling (“Stacking covariates”):

$$880 \text{logit}(p_i) = \beta_0 + X_i\beta_{\text{stack}} + \epsilon_{\text{ctry}_i} + \epsilon_i$$

881

882 3) Gaussian Process (GP):

$$883 \text{logit}(p_i) = \beta_0 + \epsilon_{\text{GP}_i} + \epsilon_{\text{ctry}_i} + \epsilon_i$$

884

885 4) Raw covariates + GP:

$$886 \text{logit}(p_i) = \beta_0 + X_i\beta_{\text{raw}} + \epsilon_{\text{GP}_i} + \epsilon_{\text{ctry}_i} + \epsilon_i$$

887

888 5) Stacking covariates + GP:

$$889 \text{logit}(p_i) = \beta_0 + X_i\beta_{\text{stack}} + \epsilon_{\text{GP}_i} + \epsilon_{\text{ctry}_i} + \epsilon_i$$

890

891 Models were compared using out-of-sample metrics of predictive accuracy using the five-fold cross-validation  
892 strategy described above, including RMSE, 95% coverage, and bias, aggregated to the second administrative level  
893 (as second-level administrative units were used to generate folds for cross validation). Supplementary Figures 28-30  
894 show the results of this comparison. Across indicators, the combination of ensemble-modelled covariates (“stacking  
895 covariates”) and the Gaussian process generally improves out-of-sample 95% coverage and produces equivalent or  
896 improved RMSE and bias compared to alternative models. Maps of estimated DPT3 coverage in 2016 for each of  
897 these comparison models can be found in Supplementary Figure 31.

898



899 **Supplementary Figure 28: Out-of-sample model comparisons for DPT3 coverage**

900 “Raw Covs” represents the INLA model fit with linear terms on all raw covariates, but without ensemble modelling or the space-time Gaussian process; “Stacked covs” corresponds to an INLA fit with the prediction surfaces obtained from covariate ensemble modelling but no space-time Gaussian process; “GP” is fit only with the space-time Gaussian process; “Raw + GP” is fit with linear terms on all raw covariates and the space-time Gaussian process; “Stacked + GP” is fit with the prediction surfaces from covariate ensemble modelling and the space-time Gaussian process and represents the model used for reporting of results in this work. Red lines and text indicate the region of the plot that indicates best performance (low bias, low RMSE, and 95% coverage equal to 95%).

901  
902  
903  
904  
905  
906

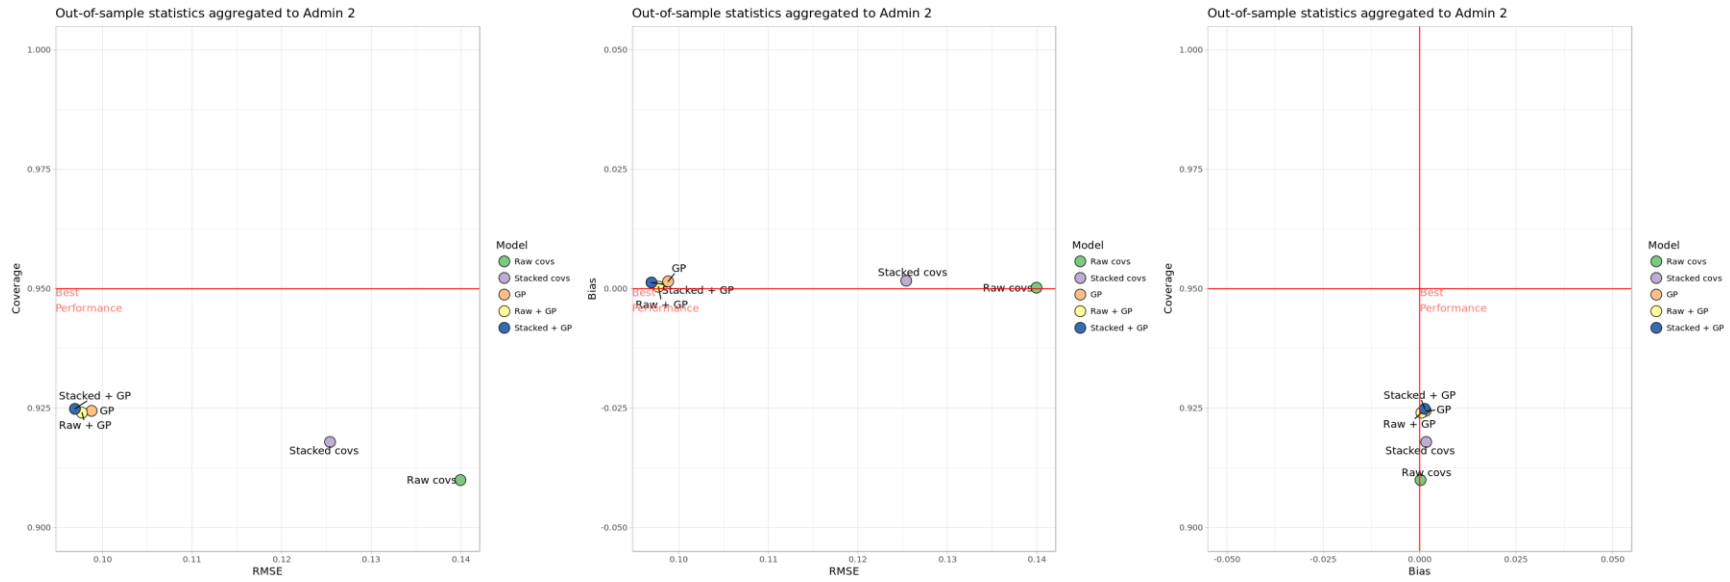

907  
908

909 **Supplementary Figure 29: Out-of-sample model comparisons for DPT1 coverage**

910 “Raw Covs” represents the INLA model fit with linear terms on all raw covariates, but without ensemble modelling or the space-time Gaussian process; “Stacked  
 911 covs” corresponds to an INLA fit with the prediction surfaces obtained from covariate ensemble modelling but no space-time Gaussian process; “GP” is fit only  
 912 with the space-time Gaussian process; “Raw + GP” is fit with linear terms on all raw covariates and the space-time Gaussian process; “Stacked + GP” is fit with  
 913 the prediction surfaces from covariate ensemble modelling and the space-time Gaussian process and represents the model used for reporting of results in this  
 914 work. Red lines and text indicate the region of the plot that indicates best performance (low bias, low RMSE, and 95% coverage equal to 95%).  
 915

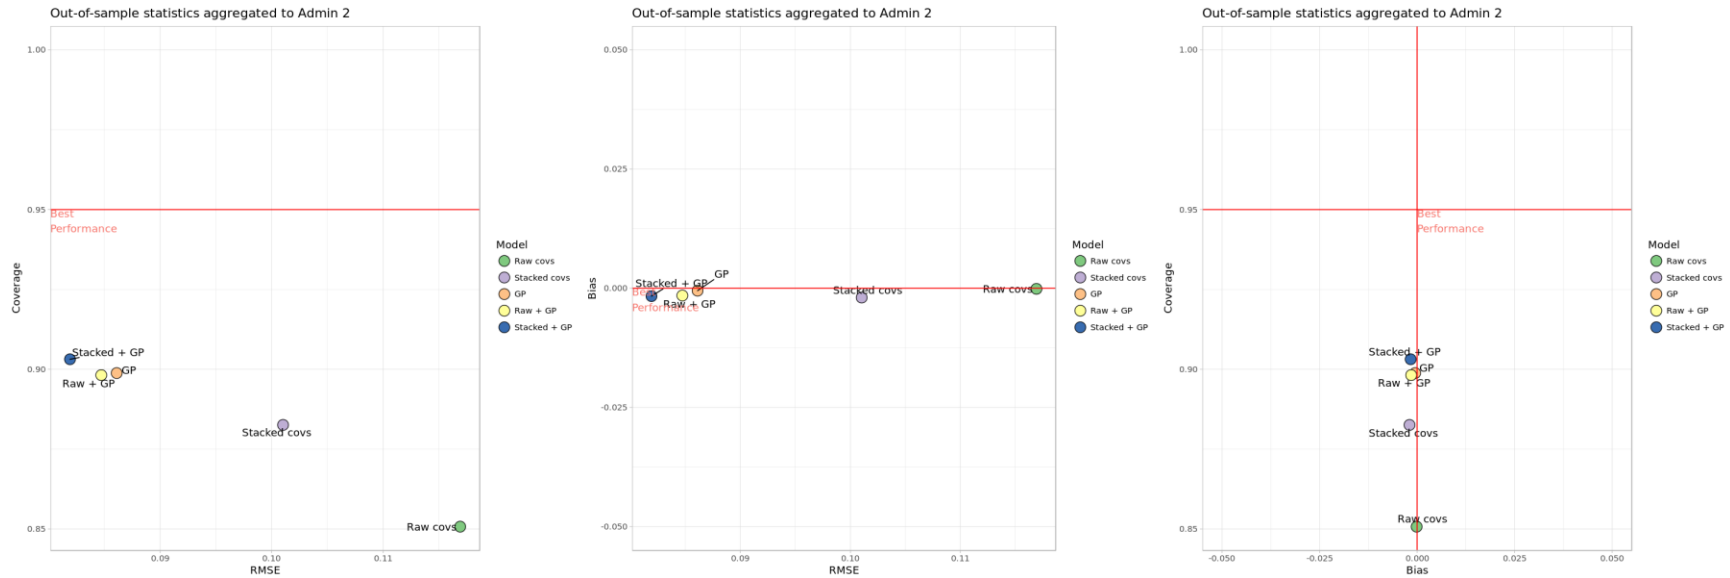

916  
 917  
 918

919 **Supplementary Figure 30: Out-of-sample model comparisons for DPT1-3 absolute dropout comparisons**

920 “Raw Covs” represents the INLA model fit with linear terms on all raw covariates, but without ensemble modelling or the space-time Gaussian process; “Stacked  
921 covs” corresponds to an INLA fit with the prediction surfaces obtained from covariate ensemble modelling but no space-time Gaussian process; “GP” is fit only  
922 with the space-time Gaussian process; “Raw + GP” is fit with linear terms on all raw covariates and the space-time Gaussian process; “Stacked + GP” is fit with  
923 the prediction surfaces from covariate ensemble modelling and the space-time Gaussian process and represents the model used for reporting of results in this  
924 work. Red lines and text indicate the region of the plot that indicates best performance (low bias, low RMSE, and 95% coverage equal to 95%).  
925  
926

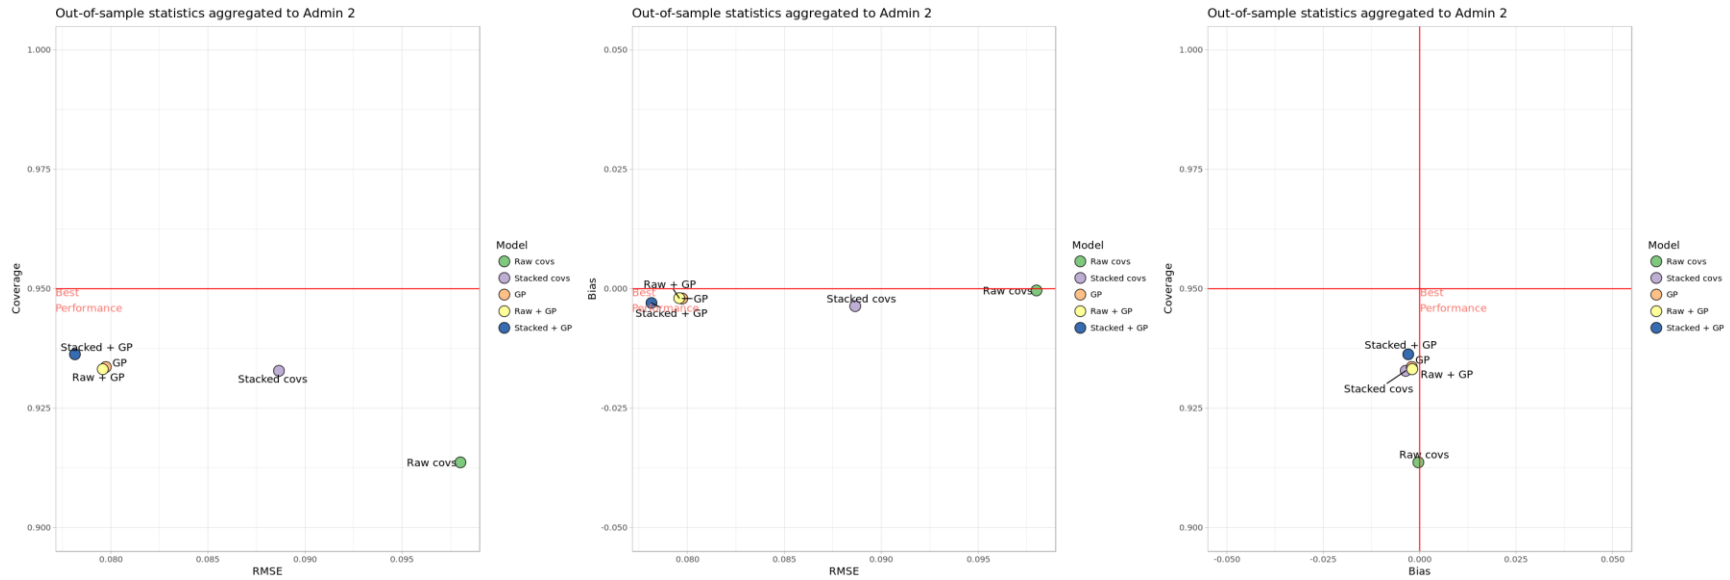

927  
928

929 **Supplementary Figure 31: Estimated DPT3 coverage for each comparison model, 2016.**

930 Each map represents estimated DPT3 coverage (prior to calibration to national-level estimates for GBD) for 2016 at a 5x5 km spatial resolution for one of the  
931 five comparison models: a) Gaussian process alone; b) Raw covariates alone; c) Ensemble-modelled covariates alone; d) Raw covariates with Gaussian process;  
932 e) Ensemble-modelled covariates with Gaussian process (the model used for reporting estimates in this analysis).  
933

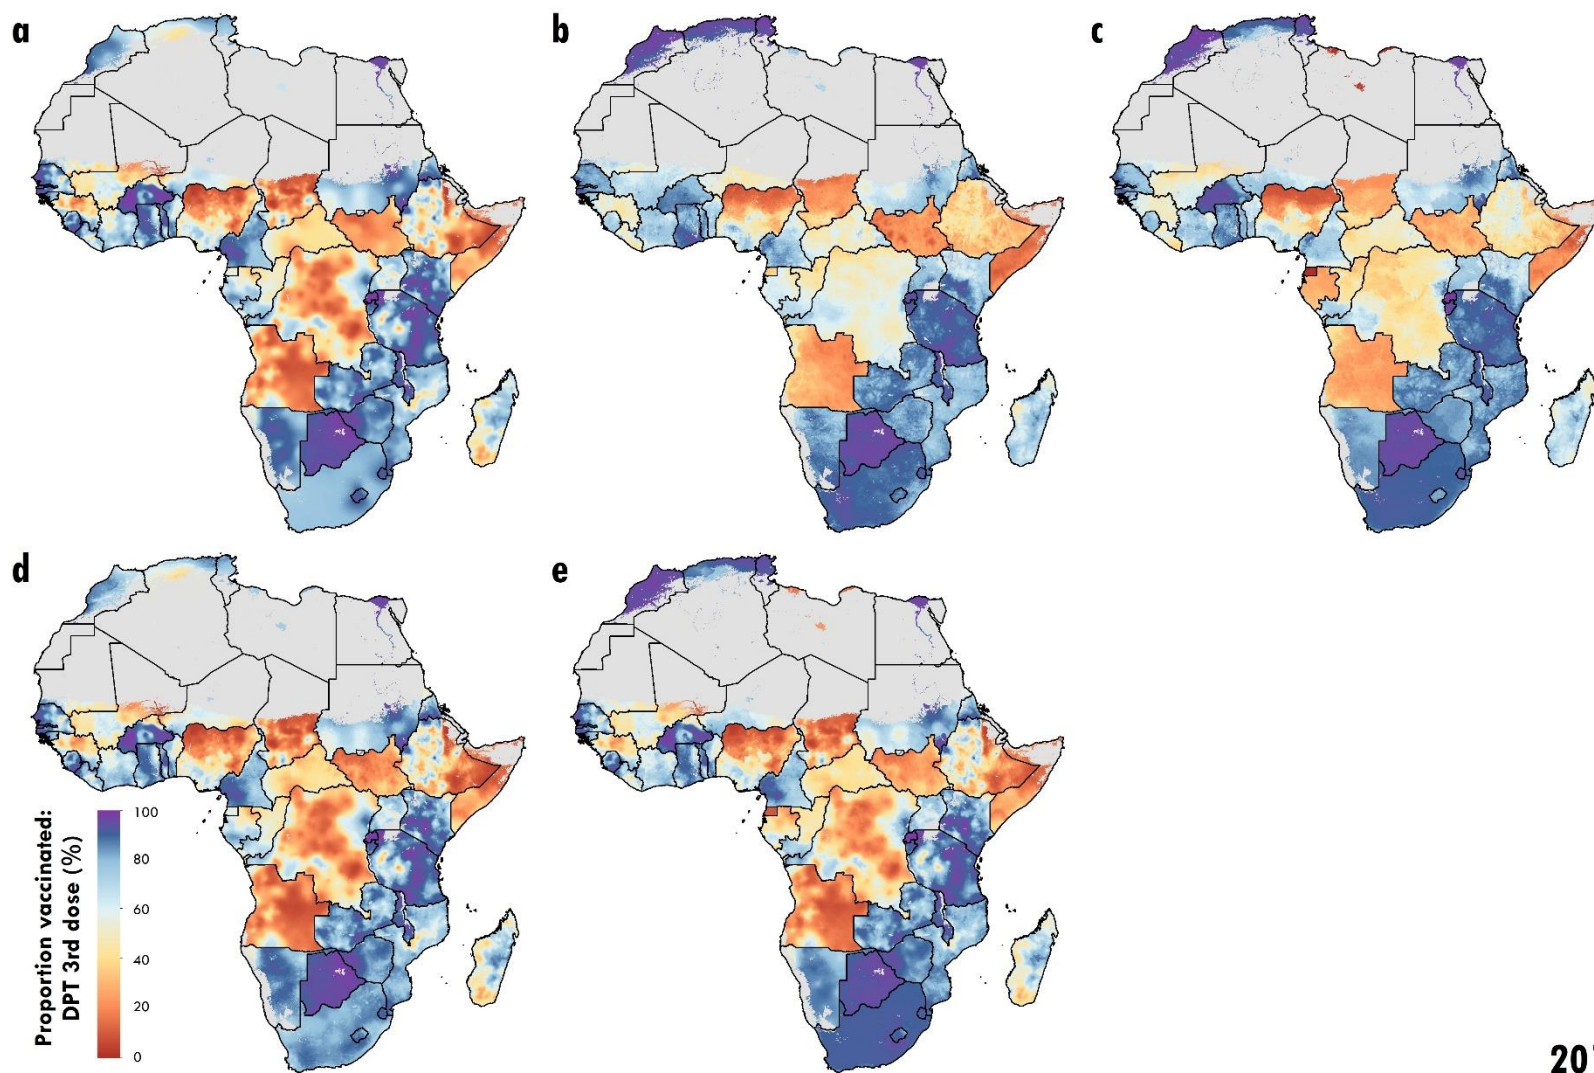

## 5.6 Post-estimation calibration to national estimates from the Global Burden of Disease Study

To ensure consistency between these geospatial estimates and national-level estimates of DPT coverage from the Global Burden of Disease (GBD) study, and to leverage additional national-level sources of data, a post-hoc calibration of estimates for each of the 1,000 candidate maps was performed. The effect of this calibration is to preserve relative spatial variation while ensuring that population-weighted averages of the 5x5 km maps at the national level are equivalent to GBD estimates.

### 5.6.1 Production of GBD national coverage estimates

The Global Burden of Disease (GBD) project produces estimates of national and subnational DTP3 immunization coverage, which are used as covariates in the estimation of multiple disease processes and burdens. For GBD 2017, estimates are produced for 195 countries and 695 subnational administrative units from 1980 through 2017. This indicator represents the proportion of surviving 12- to 23-month-olds in a given cohort who have received at least three doses of the diphtheria-tetanus-pertussis (DTP) vaccine in a given year. These methods were additionally adapted to analogously estimate DPT1 coverage, from which DPT1-3 dropout can be calculated.

#### Input Data

These estimates leverage data from household surveys as well as administrative reports of immunization coverage. Surveys which provide unit record data or summary reports on immunization coverage were included. Major multi-country survey programs used in the analysis include the Demographic and Health Surveys (DHS), Multiple Indicator Cluster Surveys (MICS), Reproductive Health Surveys (RHS), and Living Standards Measurement Study (LSMS) surveys. A comprehensive search of the Global Health Data Exchange (GHDx), as well as targeted internet searches and review of Ministry of Health websites, were also used to identify national surveys and other multi-country survey programs. Excluded subnationally-resolved surveys and differences between the data set used for geospatial estimation of DPT coverage in this study and subnationally-resolved surveys used in the GBD estimation process are summarized in Supplementary Table 2 and Supplementary Table 3.

Survey weights were applied based on survey sampling frames whenever they were available to generate weighted national estimates of vaccination coverage accompanied by estimates of standard error (SE). Estimates of SE, as well as sample sizes, were used to calculate uncertainty, as described below. Any point estimates with sample sizes less than 50 were reviewed to ensure that were not substantive outliers and would not otherwise have an undue influence on coverage estimates.

#### Inclusion of administrative data and administrative bias adjustment

Administrative estimates of immunization coverage were obtained from the Joint Reporting Form (JRF), through which the World Health Organization (WHO) and UNICEF collate annual immunization coverage reported by UN member states.<sup>22</sup> These estimates are released each July to include administrative coverage from the previous year.

The GBD process then implements a vaccine-specific bias adjustment process to account for bias in administrative reports of immunization coverage in the JRF. Given that the magnitude, direction, and cause of such biases,<sup>23,24</sup> a vaccine-specific, time-varying, all-location bias correction factor was used. To accomplish this correction, the ratio between survey coverage (where available) and matched administrative coverage was modelled in the spatiotemporal Gaussian process regression (ST-GPR) described below using the Socio-Demographic Index (SDI)<sup>11</sup> as a predictor. The inverses of these modelled ratios were then applied across the entire administrative data time series for all countries before inputting the data in the model. The adjustment often, but not always, suggested over-reporting of coverage in the JRF.

985 **Coverage trend estimation**

986  
987 The GBD study uses a spatiotemporal Gaussian process regression (ST-GPR) to synthesize point estimates from  
988 multiple data sources and derive a complete time series for each vaccine. This method has been used extensively  
989 within the GBD and related studies, and accounts for uncertainty pertaining to each point estimate while borrowing  
990 strength across geographic space and time.<sup>25-27</sup>

991  
992 Briefly, the Gaussian process is assumed to be defined by a mean function  $m(\bullet)$  and covariance function  $Cov(\bullet)$ . The  
993 mean function  $m_c(t)$  is estimated using a two-step approach:

994 
$$m_c(t) = X\beta + h(r_{c,t}),$$

995 where  $X\beta$  is a linear model and  $h(r_{c,t})$  is a smoothing function for the residuals; and  $r_{c,t}$  is derived from the linear  
996 model. The following linear model was used:

997 
$$\text{logit}(P_{c,t}) = \beta_0 + \beta_1 LDI_{c,t} + \beta_2 \text{war}_{c,t} + \alpha_c + \gamma_{R[c]} + \omega_{SR[c]} + \varepsilon_{c,t},$$

998 where  $P_{c,t}$  is vaccination coverage for country  $c$  year  $t$ ;  $LDI_{c,t}$  is lagged distributed income level for country  $c$  and  
999 year  $t$ ;  $\text{war}_{c,t}$  is the mortality rate due to conflict, used as a proxy for vaccine access and stockouts for country  $c$  year  
1000  $t$ ;  $\alpha_c$ ,  $\gamma_{R[c]}$ , and  $\omega_{SR[c]}$  are country, region, and super-region random intercepts, respectively. These estimates were  
1001 then modelled through the space-time and Gaussian process regression steps.

1002  
1003 Random draws of 1,000 samples were taken from model distributions for every country for a given vaccine. Ninety-  
1004 five percent uncertainty intervals were calculated by taking the ordinal 25 and 975th draws from the sample  
1005 distribution.

1006  
1007 **5.6.2 Calibration of geospatial estimates to GBD national coverage estimates**

1008  
1009 Using these national-level coverage estimates, the calibration method applied to the geospatial estimates generally  
1010 followed previous methods used in geospatial estimation of under-5 mortality, education, and child growth failure.<sup>5,7</sup>  
1011 While this previous work performed calibration in untransformed space, here calibration was performed in logit  
1012 space in order to ensure that all predictions remained between 0% and 100%. For each country  $i$  and year  $j$ , mean  
1013 national-level estimates of vaccine coverage were obtained from the Global Burden of Disease study ( $C_{GBD}$ ) and  
1014 calculated as population-weighted averages from 5x5 km model-based geostatistical estimates ( $C_{MBG}$ ). A country-  
1015 year specific calibration factor  $k_{i,j}$  was then calculated such that

1016  
1017 
$$\text{logit}(C_{GBD,ij}) = \text{logit}(C_{MBG,ij}) + k_{i,j}$$

1018  
1019 These calibration factors were then applied to each 5x5 km location and draw within the country year, yielding a  
1020 calibrated set of candidate maps.

1021  
1022 This calibration process was performed on draw-level estimates of two vaccine coverage quantities generated using  
1023 the continuation ratio ordinal regression framework described above: DPT3 coverage ( $p(d \geq 3)$ , where  $d$  is equal to  
1024 the number of doses received) and the conditional probability of incomplete vaccination given either incomplete or  
1025 no vaccination ( $p(1 \leq d \leq 2 \mid d \leq 2)$ ). These calibrated probabilities were then combined arithmetically to yield  
1026 calibrated estimates of DPT1 coverage, DPT3 coverage, and DPT 1-3 dropout. This conditional calibration process  
1027 ensured that this calibration process preserved the internal consistency of estimates produced by the continuation  
1028 ratio ordinal regression model – that is, that all probabilities of vaccine status sum to 1 at the draw level.

1029 Supplementary Figure 32 shows an example of the results of this process for a single 5x5 km location and year,  
1030 where each point represents a single draw.

1031

1032 **Supplementary Figure 32: Ternary plot of example pixel-level calibration to GBD estimates**  
1033 Left: pre-calibration estimates; right: post-calibration estimates. Each point represents a single draw's position in  
1034 ternary space. In this example, estimates of DPT3 coverage were similar for both GBD and geospatial estimates,  
1035 although GBD estimated relatively more children receiving 1 or 2 doses, while the geostatistical process estimated  
1036 more children receiving 0 doses. Note that this process preserves the relative positions of each point in ternary  
1037 space.  
1038

1039

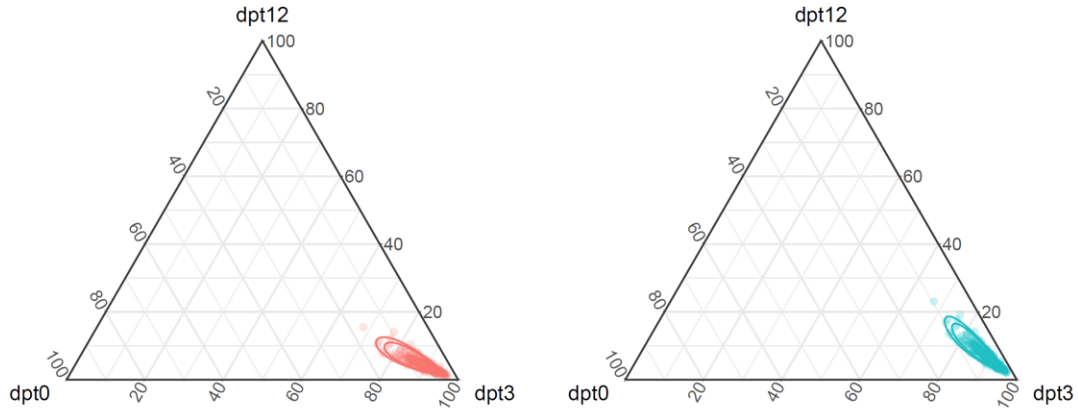

1040 **6.0 Comparison of results to existing estimates**

1041

1042 **6.1 Comparison of pre-calibration geospatial model to GBD estimates**

1043

1044 In order to compare the pre-calibration estimates produced by the geospatial modelling process to GBD estimates  
1045 produced using space-time Gaussian process regression, scatter plots are provided in Supplementary Figures 33-35.  
1046 Each point represents an estimate of the given indicator for a single country and year, accompanied by 95% credible  
1047 intervals. Points with a difference of > 25 percentage points between MBG and GBD estimates are labelled with  
1048 country (ISO3 code) and year. The majority of these largest discrepancies occur in countries where no subnationally  
1049 resolved data was available for inclusion in the geospatial model, indicating the degree to which the geospatial  
1050 estimates in these countries are informed by the national-level GBD estimates (and highlighting the benefit of  
1051 calibration to national-level estimates). Note that in addition to survey data GBD models leverage bias-corrected  
1052 administrative data, and that the survey sources utilized by the MBG and GBD models differ (See Supplementary  
1053 Table 3).

1054

1055



1056 **Supplementary Figure 33: Comparison of national-level estimates of DPT3 coverage from model-**  
1057 **based geostatistics (MBG) and the Global Burden of Disease study (GBD).**  
1058

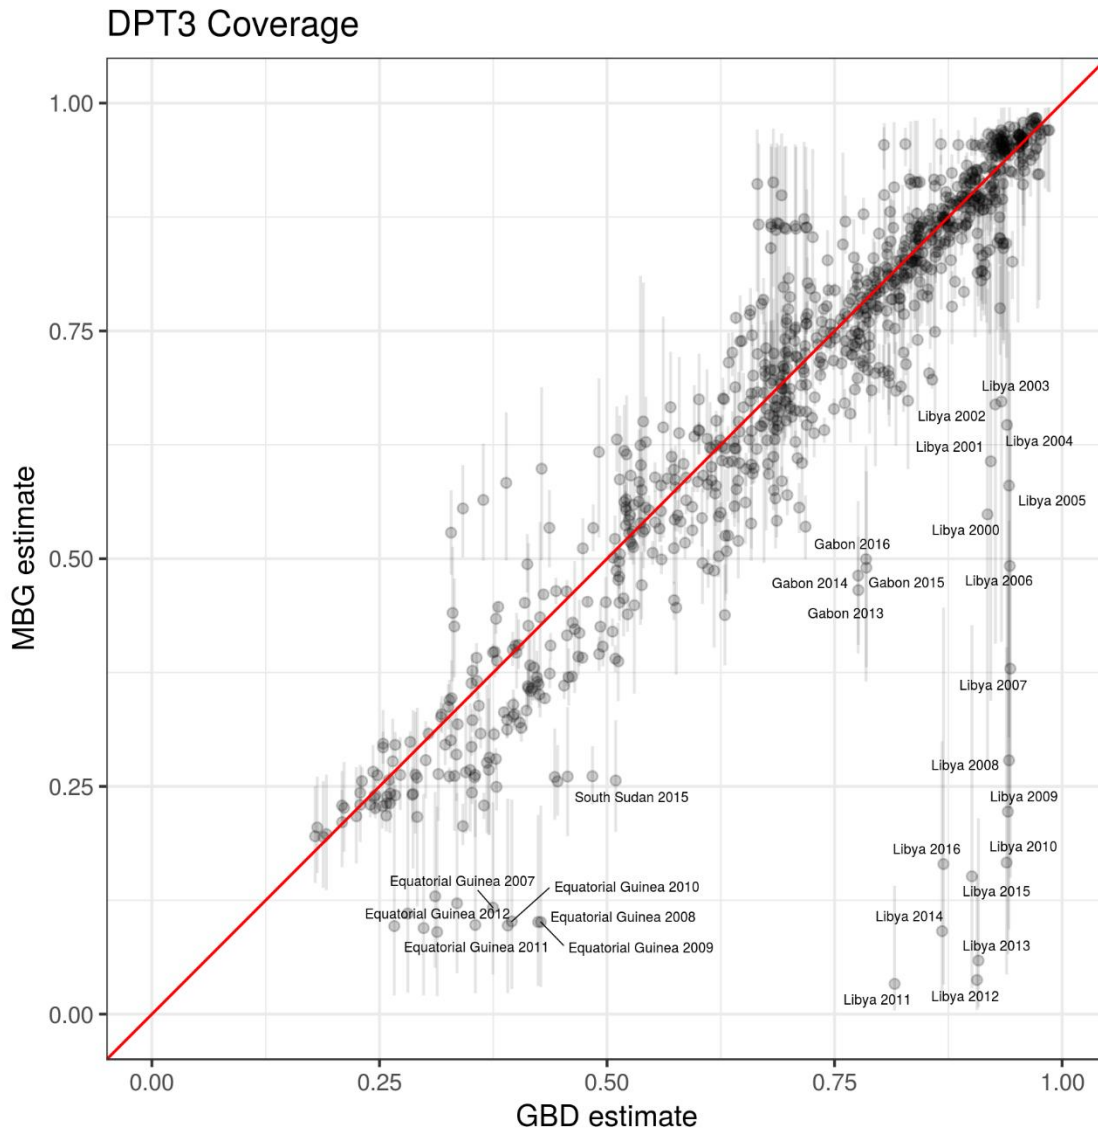

1059  
1060

1061 **Supplementary Figure 34: Comparison of national-level estimates of DPT1 coverage from model-**  
1062 **based geostatistics (MBG) and the Global Burden of Disease study (GBD).**  
1063

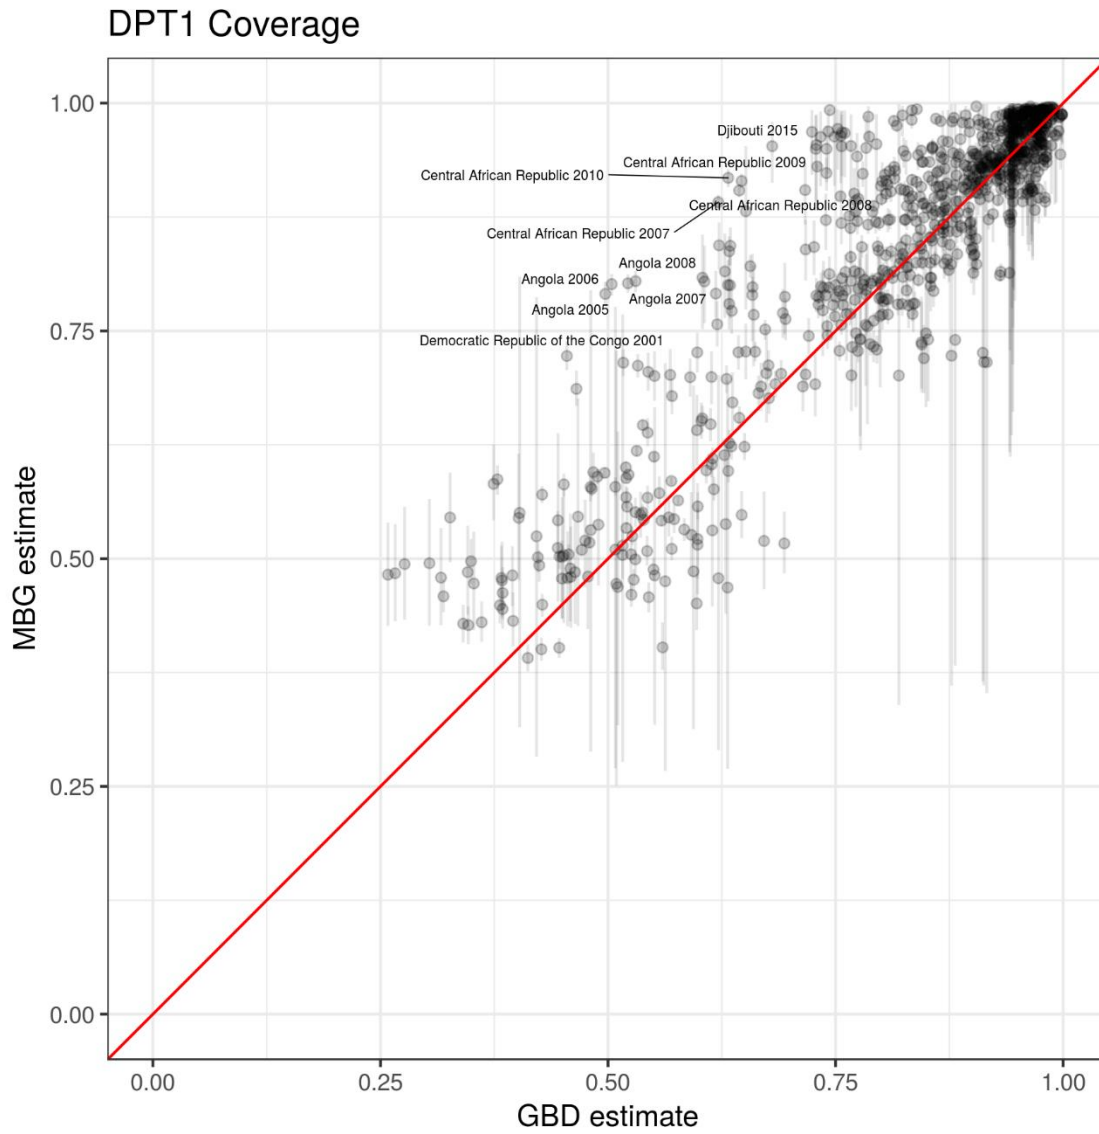

1064  
1065

1066 **Supplementary Figure 35: Comparison of national-level estimates of DPT1-3 absolute dropout from**  
1067 **model-based geostatistics (MBG) and the Global Burden of Disease study (GBD).**

### DPT1-3 Absolute Dropout

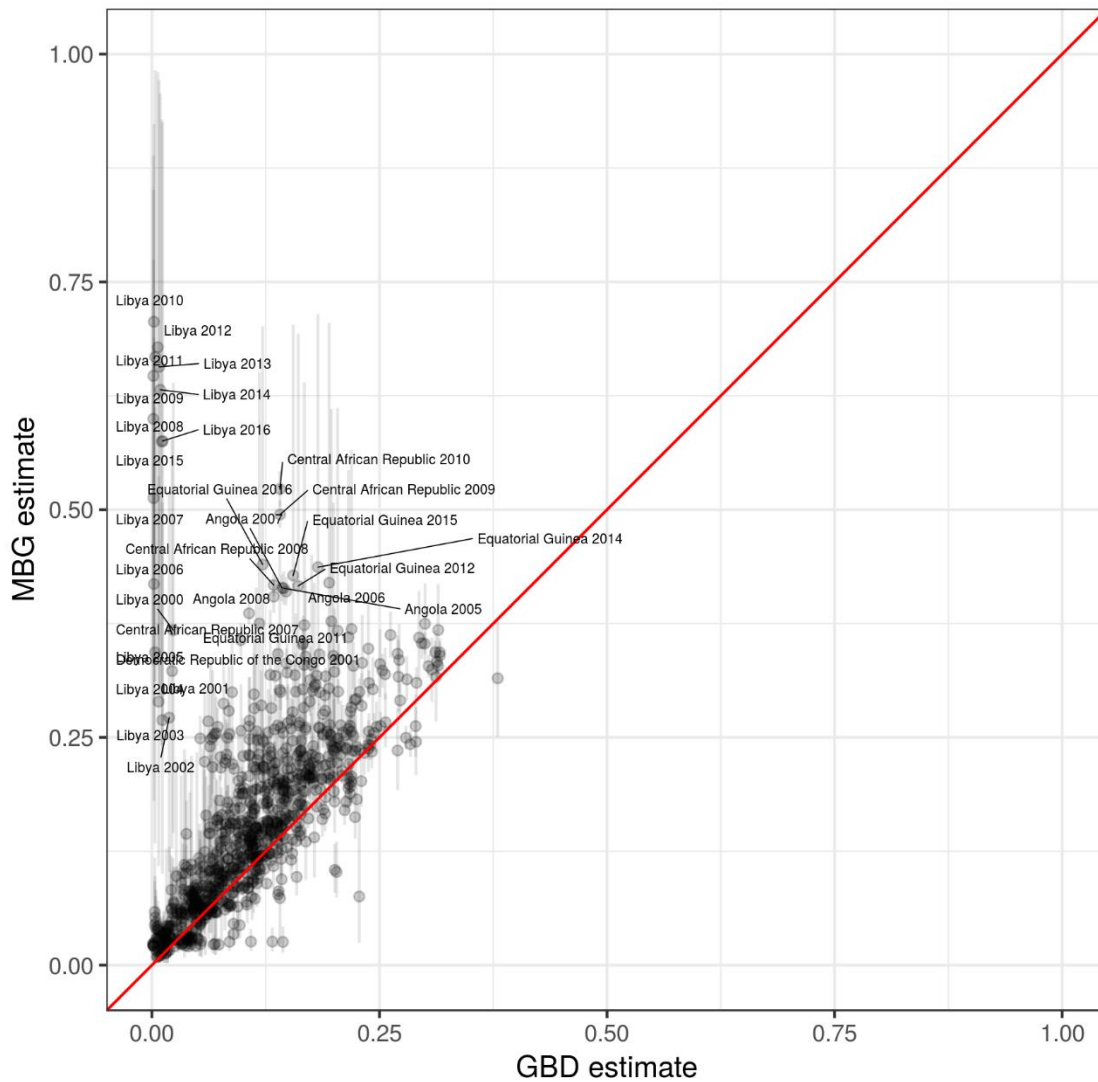

1068  
1069  
1070  
1071  
1072  
1073  
1074  
1075  
1076  
1077  
1078

## 6.2 Comparison to DHS estimates

Supplementary Figures 36-38 compare estimates of DPT coverage in 12-23 month olds produced by the model-based geostatistical methods used in this study to corresponding estimates from DHS survey data, aggregated to the first administrative level. Each point in the graph represents a single administrative and DHS survey. MBG estimates are plotted with accompanying 95% certainty intervals, and separate graphs are provided for both MBG estimates both before (“uncalibrated”) and after (“calibrated”) calibration to GBD estimates.



1084 **Supplementary Figure 37: Comparison of calibrated model-based geostatistical (MBG) and DHS**  
1085 **estimates of DPT1 coverage at the first administrative level.**  
1086

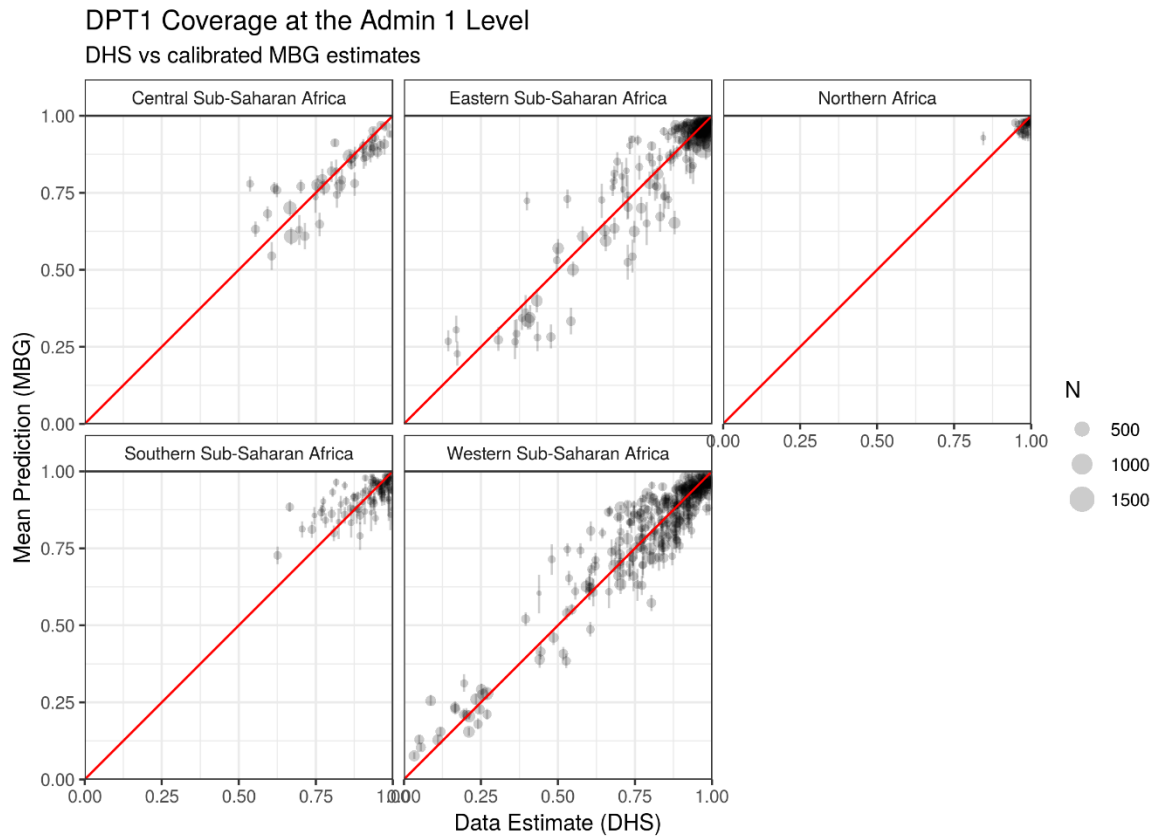

1087  
1088

1089 **Supplementary Figure 38: Comparison of calibrated model-based geostatistical (MBG) and DHS**  
1090 **estimates of DPT 1-3 absolute dropout at the first administrative level.**  
1091

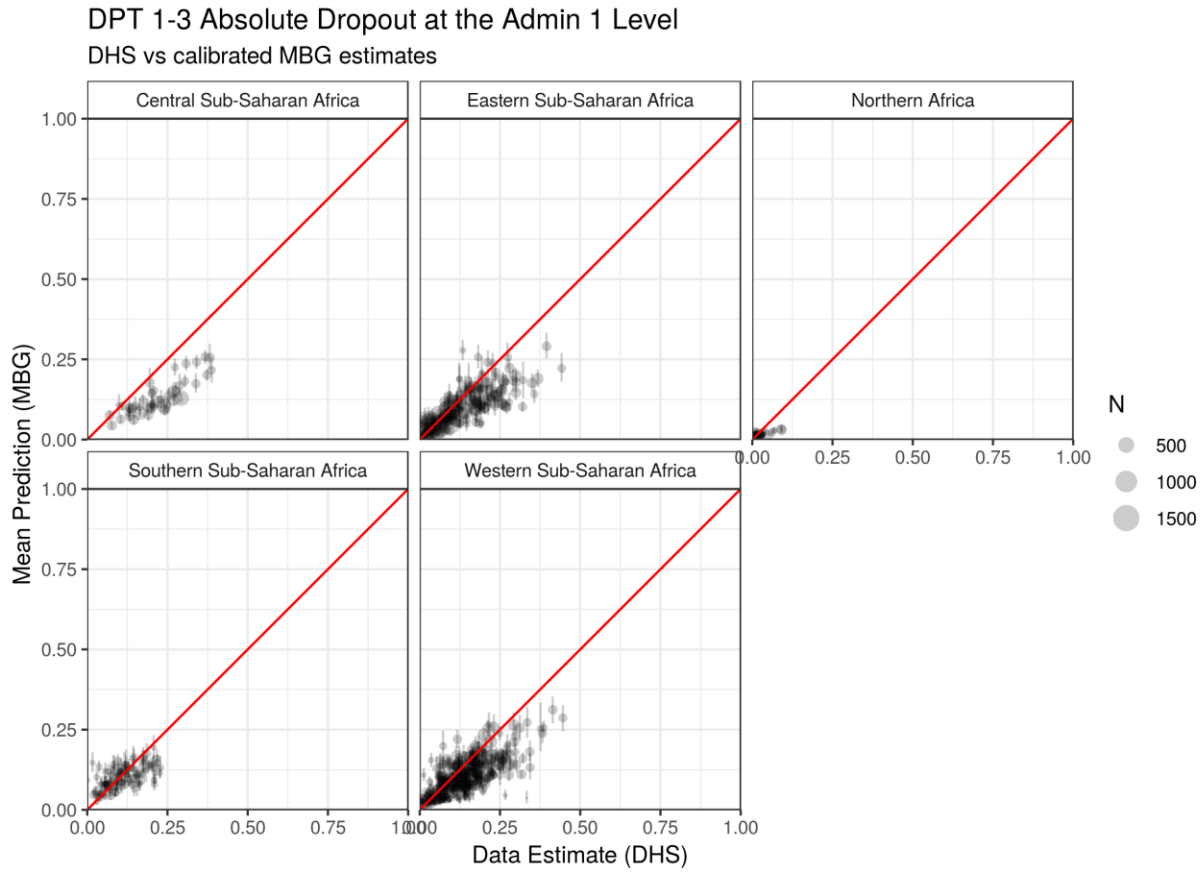

1092  
1093

1094  
1095  
1096  
1097  
1098  
1099  
1100  
1101  
1102  
1103  
1104

### 6.3 Comparison to Gavi Full Country Evaluations Project small area estimates

Supplementary Figures 39-43 compare estimates produced by the model-based geostatistical methods used in this study with the small area estimates of DPT3 coverage for varying administrative levels between 2000 and 2015 from the Gavi Full Country Evaluations project.<sup>28</sup> Each point represents a single administrative unit and year.

**Supplementary Figure 39: Comparison of MBG and Gavi FCE second-administrative-level estimates of DPT3 coverage for Cameroon, 2000-2015.**

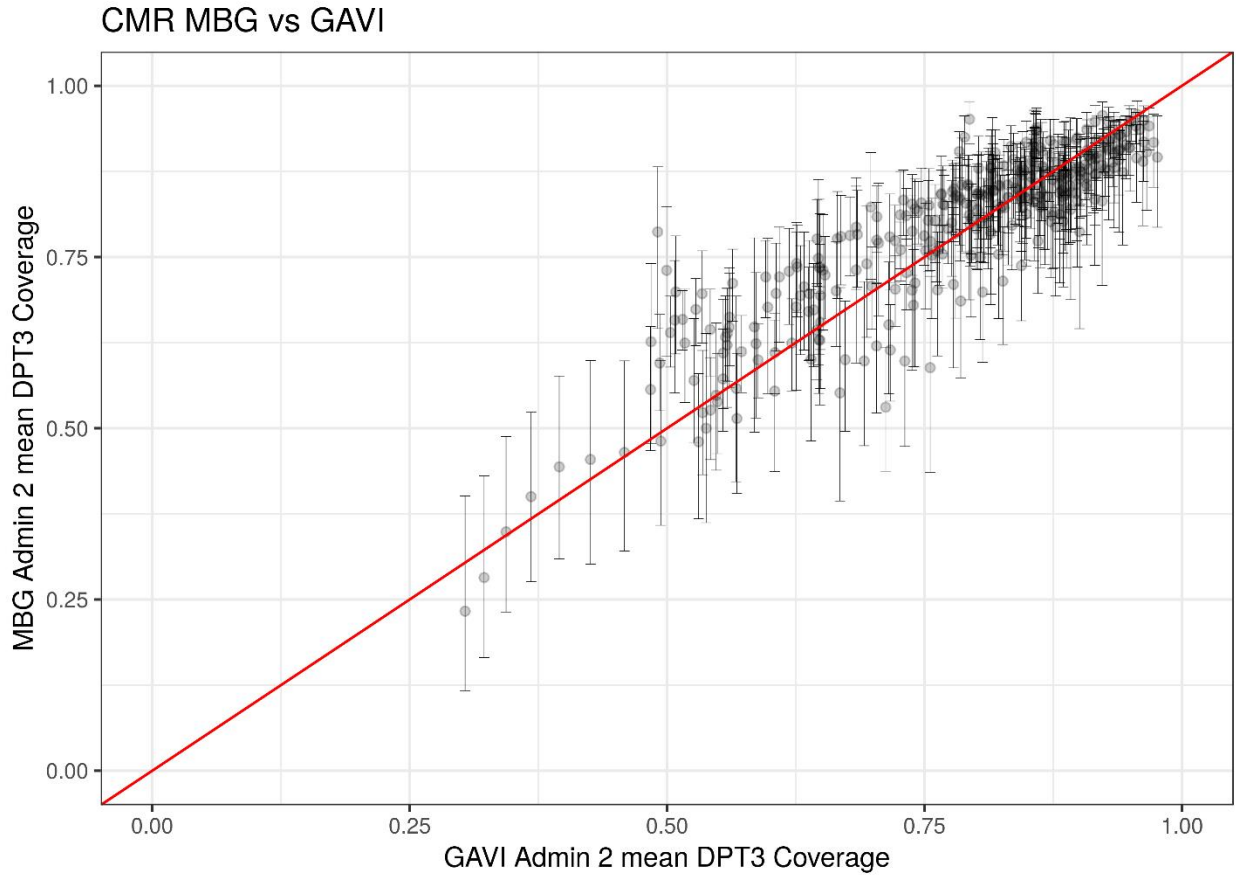

1105

1106 **Supplementary Figure 40: Comparison of MBG and Gavi FCE second-administrative-level estimates**  
1107 **of DPT3 coverage for Mozambique, 2000-2015.**  
1108

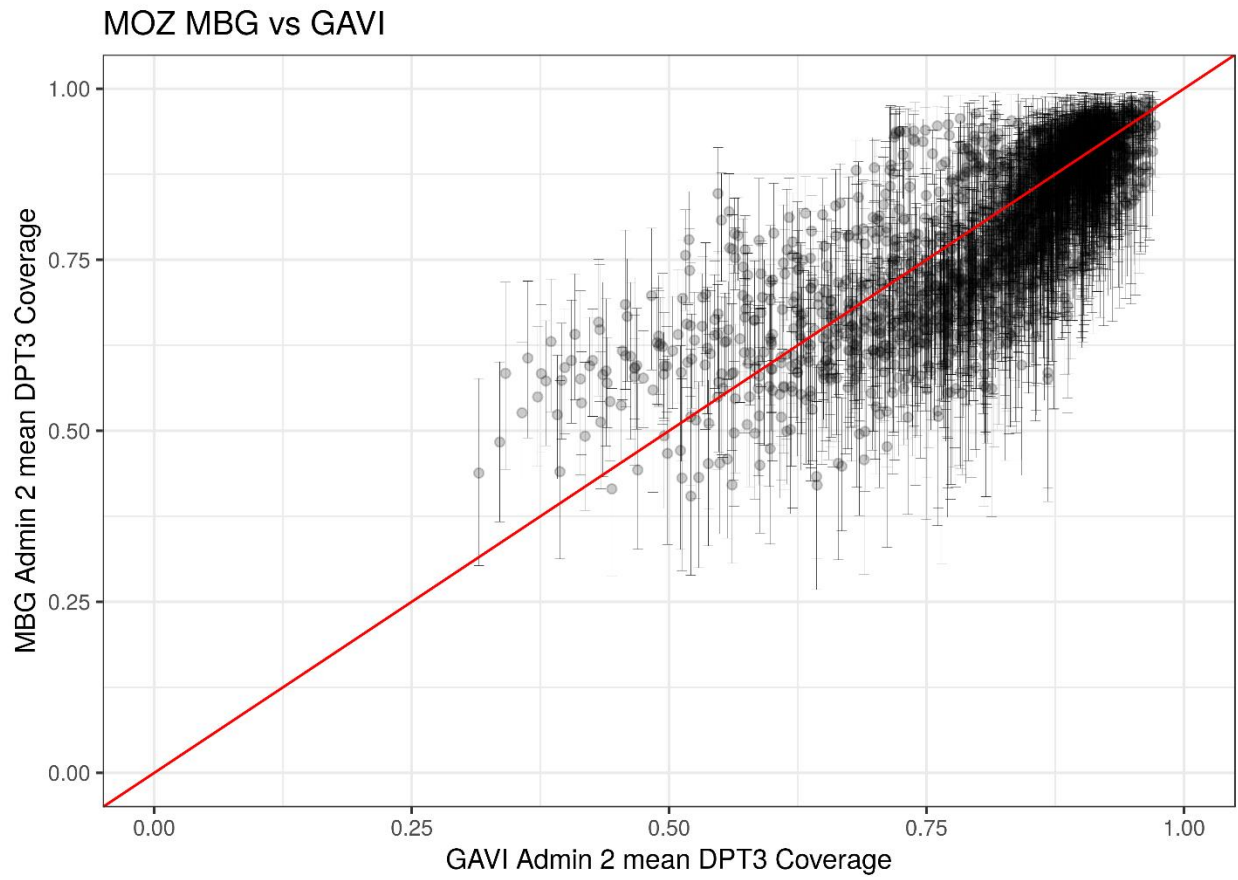

1109  
1110



1111 **Supplementary Figure 41: Comparison of MBG and Gavi FCE second-administrative-level estimates**  
1112 **of DPT3 coverage for Chad, 2000-2015.**  
1113

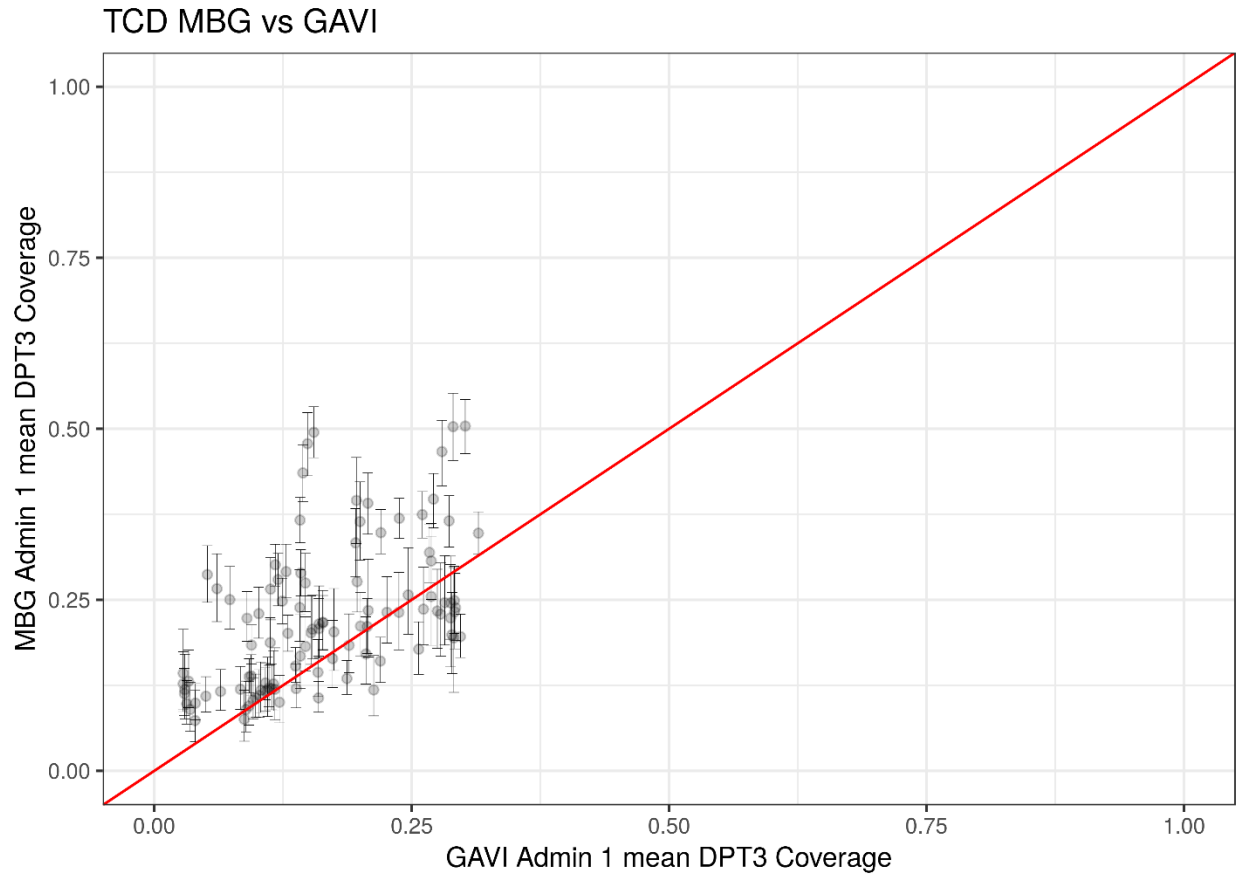

1114  
1115

1116 **Supplementary Figure 42: Comparison of MBG and Gavi FCE second-administrative-level estimates**  
1117 **of DPT3 coverage for Uganda, 2000-2015.**  
1118

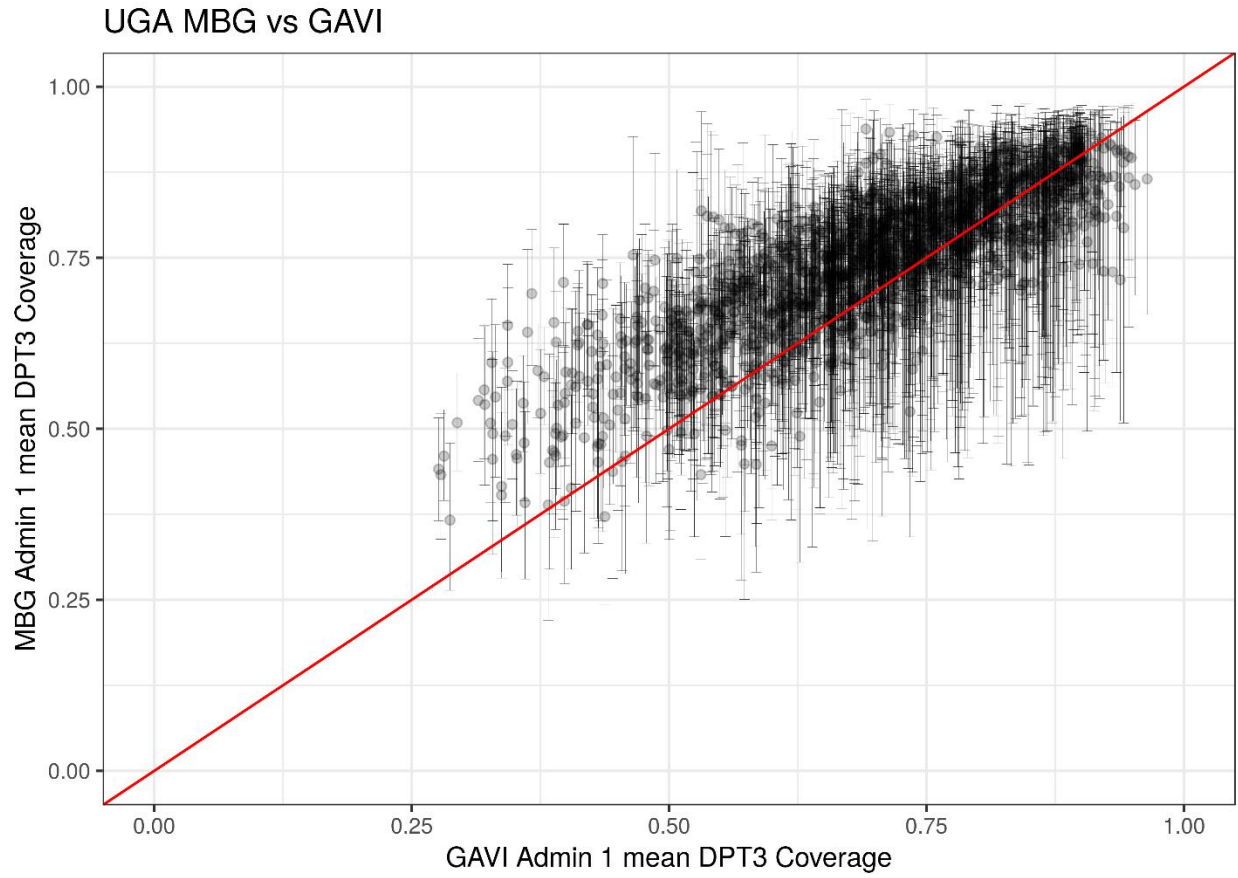

1119

1120 **Supplementary Figure 43: Comparison of MBG and Gavi FCE second-administrative-level estimates**  
1121 **of DPT3 coverage for Zambia, 2000-2015.**  
1122

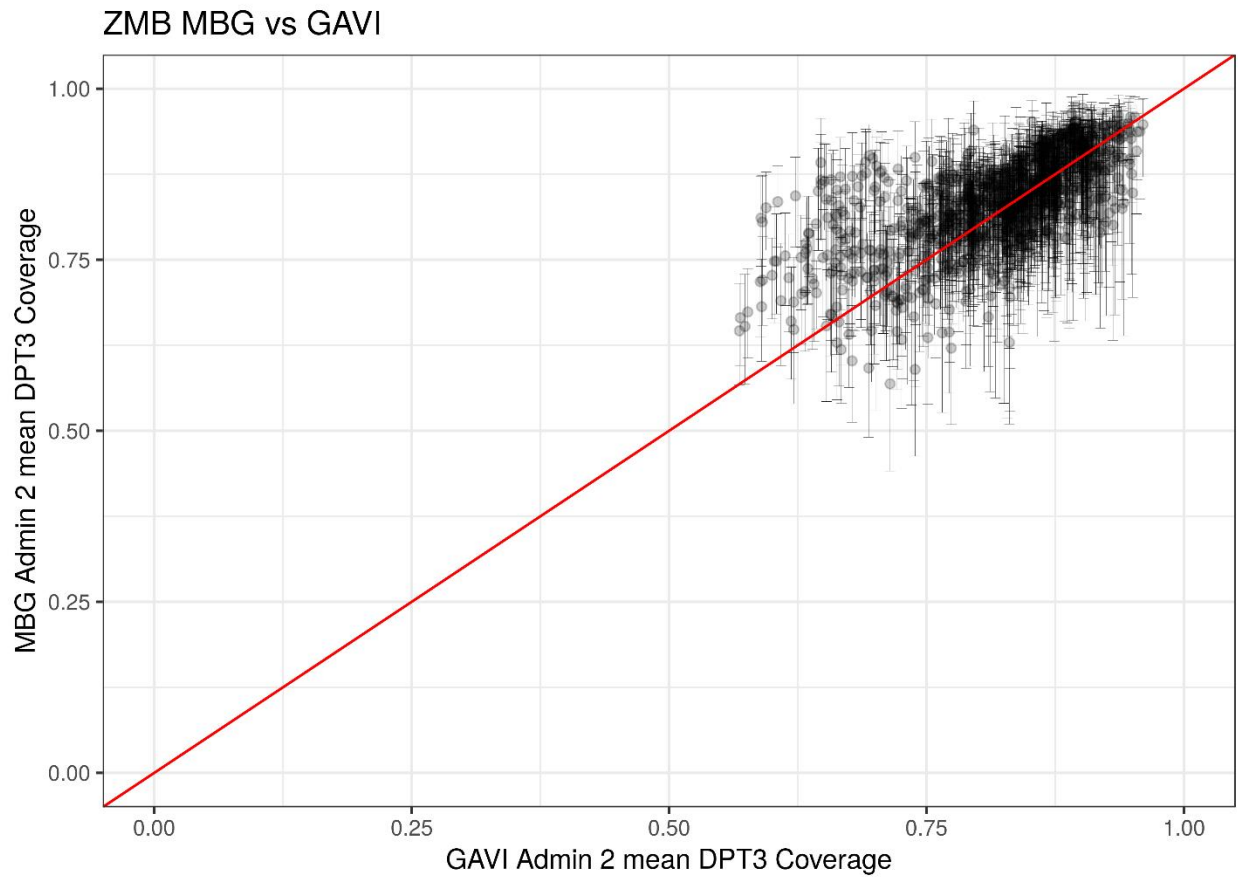

1123  
1124  
1125

1126 **6.0 References**

- 1127
- 1128 1. Tatem AJ. WorldPop, open data for spatial demography. *Scientific Data* 2017; 4: 170004.
- 1129 2. S Channan, K. Collins, W. R. Emanuel. Global mosaics of the standard MODIS land cover  
1130 type data. 2014. <http://glcf.umd.edu/data/lc/> (accessed Mar 15, 2019).
- 1131 3. GeoNetwork. Global Administrative Unit Layers (GAUL). 2007.  
1132 <http://www.fao.org/geonetwork/srv/en/metadata.show?id=12691> (accessed Mar 15, 2019).
- 1133 4. Global Administrative Areas. GADM Database of Global Administrative Areas. 2018.  
1134 <http://gadm.org/data.html> (accessed Mar 15, 2019).
- 1135 5. Osgood-Zimmerman A, Milllear AI, Stubbs RW, Shields C, Pickering BV, Earl L, et al.  
1136 Mapping child growth failure in Africa between 2000 and 2015. *Nature* 2018; 555(7694):  
1137 41–7.
- 1138 6. Graetz N, Friedman J, Osgood-Zimmerman A, Burstein R, Biehl MH, Shields C, et al.  
1139 Mapping local variation in educational attainment across Africa. *Nature* 2018; 555(7694):  
1140 48–53.
- 1141 7. Golding N, Burstein R, Longbottom J, Browne AJ, Fullman N, Osgood-Zimmerman A, et  
1142 al. Mapping under-5 and neonatal mortality in Africa, 2000–15: a baseline analysis for the  
1143 Sustainable Development Goals. *Lancet* 2017; 390(10108): 2171–82.
- 1144 8. Lumley, T. Analysis of Complex Survey Samples. *J Stat Softw* 2004; 9(8): 1-19.
- 1145 9. Lloyd CT, Sorichetta A, Tatem AJ. High resolution global gridded data for use in  
1146 population studies. *Sci Data* 2017; 4: 170001.
- 1147 10. WorldPop. WorldPop dataset. 2019. [http://www.worldpop.org.uk/data/get\\_data/](http://www.worldpop.org.uk/data/get_data/) (accessed  
1148 15 Mar 2019).
- 1149 11. Naghavi M, Abajobir AA, Abbafati C, Abbas KM, Abd-Allah F, Abera SF, et al. Global,  
1150 regional, and national age-sex specific mortality for 264 causes of death, 1980–2016: a  
1151 systematic analysis for the Global Burden of Disease Study 2016. *Lancet* 2017;  
1152 390(10100): 1151–210.
- 1153 12. Bhatt S, Cameron E, Flaxman SR, Weiss DJ, Smith DL, Gething PW. Improved prediction  
1154 accuracy for disease risk mapping using Gaussian process stacked generalization. *J R Soc*  
1155 *Interface* 2017; 14(134): 20170520.
- 1156 13. Stein ML. Interpolation of Spatial Data: Some Theory for Kriging. New York: Springer-  
1157 Verlag; 1999.
- 1158 14. Rue H, Martino S, Chopin N. Approximate Bayesian inference for latent Gaussian models  
1159 by using integrated nested Laplace approximations. *J R Stat Soc Ser B Stat Methodol.* 2009;  
1160 71(2): 319–92.

- 1161 15. Martins TG, Simpson D, Lindgren F, Rue H avar. Bayesian computing with INLA: new  
1162 features. *Comput Stat Data Anal.* 2013; 67: 68–83.
- 1163 17. Lindgren F, Rue H, Lindström J. An explicit link between Gaussian fields and Gaussian  
1164 Markov random fields: the stochastic partial differential equation approach. *J R Stat Soc Ser*  
1165 *B Stat Methodol.* 2011; 73(4): 423–98.
- 1166 18. Waller, L. & Carlin, B. Disease mapping. In: *Handbook of Spatial Statistics.* CRC Press;  
1167 2010. p. 217–43.
- 1168 19. Hosmer DW, Lemeshow S, Sturdivant RX. Ordinal Logistic Regression Models. In:  
1169 *Applied logistic regression.* Third edition. Hoboken, New Jersey: Wiley; 2013. p. 289–305.
- 1170 20. Coffey MP, Feingold M, Bromberg J. A normed measures of variability among proportions.  
1171 *Comput Stat Data Anal.* 1988; 7(2): 127–141.
- 1172 21. Roberts DR, Bahn V, Ciuti S, Boyce MS, Elith J, Guillera-Aroita G, et al. Cross-validation  
1173 strategies for data with temporal, spatial, hierarchical, or phylogenetic structure. *Ecography*  
1174 2017; 40(8): 913–29.
- 1175 22. World Health Organization (WHO). WHO/UNICEF Joint Reporting Process. 2013.  
1176 [http://www.who.int/immunization/monitoring\\_surveillance/routine/reporting/reporting/en/](http://www.who.int/immunization/monitoring_surveillance/routine/reporting/reporting/en/)  
1177 (accessed 14 Mar 2019).
- 1178 23. Murray CJL, Shengelia B, Gupta N, Moussavi S, Tandon A, Thieren M. Validity of  
1179 reported vaccination coverage in 45 countries. *Lancet* 2003; 362(9389): 1022–7.
- 1180 24. Haddad S, Bicaba A, Feletto M, Fournier P, Zunzunegui MV. Heterogeneity in the validity  
1181 of administrative-based estimates of immunization coverage across health districts in  
1182 Burkina Faso: implications for measurement, monitoring and planning. *Health Policy Plan.*  
1183 2010; 25(5): 393–405.
- 1184 25. Ng M, Freeman MK, Fleming TD, et al. Smoking prevalence and cigarette consumption in  
1185 187 countries, 1980-2012. *JAMA* 2014; 311(2): 183–92.
- 1186 26. Ng M, Fleming T, Robinson M, Thomson B, Graetz N, Margono C, et al. Global, regional,  
1187 and national prevalence of overweight and obesity in children and adults during 1980–  
1188 2013: a systematic analysis for the Global Burden of Disease Study 2013. *Lancet* 2014;  
1189 384(9945): 766–81.
- 1190 27. Wang H, Liddell CA, Coates MM, Mooney MD, Levitz CE, Schumacher AE, et al. Global,  
1191 regional, and national levels of neonatal, infant, and under-5 mortality during 1990–2013: a  
1192 systematic analysis for the Global Burden of Disease Study 2013. *Lancet* 2014; 384(9947):  
1193 957–79.
- 1194 28. Cross-Country: Findings from the 2015 Gavi Full Country Evaluations. 2016.  
1195 <http://www.gavi.org/results/evaluations/full-country-evaluations/> (accessed 16 Mar 2019).
